# Supplementary material for: Major infections following pediatric cardiac surgery pre- and post-CLABSI bundle implementation
Source: PeerJ. 2022 Oct 28;10:e14279. doi: 10.7717/peerj.14279 (PMC9620976; doi:10.7717/peerj.14279)
Supplement: Data S1 [file peerj-10-14279-s004.xlsx]

## Sheet: Sheet1
Pre_or_post	ID	Sex	DOB	Date_Dx_other	BW	BW_gr_5kg	Ht	Diagnosis	Dx_cyanosis_acyanosis	Single_ventricle	Syndrome	Syndrome_detail	Down_syndrome	DiGeorge_syndrome	CHARGE_syndrome	Etc_syndrome	Other_Dx	Other_Dx_detail	Asplenia_polysplenia	CHF	PHT	Previous_CVT_surgery	Previous_CVT_surgery_detail	Major_infections_within_3month_pre_op	Major_infections_within_3month_pre_op_detail	Pre_op_functional_class	Pre_op_functional_class_2gr	On_ventilator_pre_op	Retained_central_line_pre_op	Pre_op_medication	Pre_op_medication_detail	ATB_pre_op_beyond_prophylaxis	ATB_pre_op_beyond_prophylaxis_detail	Date_operation	Name_operation	Aristotle_score	aristotle_score_6.3	Aristotle_score_gr_62_score	Type_onset	Type_onset_2gr	Type	Operation_time_min	Operation_time_240min	CBP_time	CBP_time_85min	CBP_time_90min	CBP_time_90default	X_clamp_time	X_clamp_time_60min
post	6	male	2019-04-29	#NULL!	2.1	< 5 kg	48.5	DORV with subaortic VSD, mild subvalvular PS with PDA with spongy myocardium, complete heart block	cyanosis	no	no		no	no	no	no	no		yes	yes	no	no		no		4	class 3-4	yes	yes	no		yes	meropenem	2019-06-17	PPM insertion	3	other	< 6.2 score	elective	elective	closed heart	105	<240 min	#NULL!	#NULL!	no	closed and < 90 min	#NULL!	#NULL!
pre	225	female	2010-03-12	2017-03-07	18.7	>= 5kg	119.3	ASD secundum with PA sling with mild TR	acyanosis	no	no		no	no	no	no	no		no	no	no	no		no		1	class 1-2	no	no	no		no		2018-04-19	ASD closure, LPA relocation	9	other	>= 6.2 score	elective	elective	open heart	155	<240 min	99	>=85 min	>=90 min	CBP time > 90 min	57	<60 min
pre	252	male	2016-10-26	2016-10-26	9.5	>= 5kg	76	Severe supravalvular AS with mild hypoplastic branch PA	acyanosis	no	no		no	no	no	no	no		no	no	no	no		no		2	class 1-2	no	no	no		no		2018-06-20	Three-sinus reconstruction (Brom's technique)	9.5	other	>= 6.2 score	elective	elective	open heart	271	>=240 min	169	>=85 min	>=90 min	CBP time > 90 min	113	>=60min
post	44	female	2019-01-01	2019-03-09	6.9	>= 5kg	71	Moderate perimembranous to inlet VSD	acyanosis	no	no		no	no	no	no	no		no	yes	no	no		no		3	class 3-4	no	no	yes	lasix,aldactone	no		2020-01-25	VSD clousre, TV repair	6	other	< 6.2 score	elective	elective	open heart	80	<240 min	44	< 85min	< 90min	closed and < 90 min	24	<60 min
post	43	male	2019-05-27	2019-05-31	5.6	>= 5kg	67	:arge perimembranous to outlet VSD	acyanosis	no	no		no	no	no	no	no		no	yes	yes	no		no		2	class 1-2	no	no	yes	lasix,aldactone	no		2020-01-18	VSD closure	6	other	< 6.2 score	elective	elective	open heart	130	<240 min	52	< 85min	< 90min	closed and < 90 min	35	<60 min
post	164	female	2018-10-17	#NULL!	6.6	>= 5kg	73	Inlet type VSD	acyanosis	no	no		no	no	no	no	no		no	yes	no	no		no		3	class 3-4	no	no	no		no		2019-08-31	VSD closure	6	other	< 6.2 score	elective	elective	open heart	115	<240 min	50	< 85min	< 90min	closed and < 90 min	35	<60 min
pre	255	male	2007-03-06	2017-12-14	28	>= 5kg	126	Perimembranous VSD	acyanosis	no	no		no	no	no	no	no		no	no	yes	no		no		2	class 1-2	no	no	no		no		2018-06-29	VSD closure using aotologus glutaldehyde pericardial patch	6	other	< 6.2 score	elective	elective	open heart	140	<240 min	65	< 85min	< 90min	closed and < 90 min	48	<60 min
pre	174	male	2016-06-08	2016-10-08	8.5	>= 5kg	87	Perimembranous VSD	acyanosis	no	no		no	no	no	no	no		no	yes	yes	no		no		2	class 1-2	no	no	yes	lasix, aldactone, lanoxin	no		2019-01-10	VSd closure	6	other	< 6.2 score	elective	elective	open heart	110	<240 min	55	< 85min	< 90min	closed and < 90 min	42	<60 min
pre	259	female	2017-11-30	2017-11-30	5.06	>= 5kg	65	Large perimembranous VSD with PAH	acyanosis	no	no		no	no	no	no	no		no	yes	yes	no		no		3	class 3-4	no	no	no		no		2018-07-06	VSD closure using autologous glutaldehyde treated pericardial patch	6	other	< 6.2 score	elective	elective	open heart	90	<240 min	72	< 85min	< 90min	closed and < 90 min	49	<60 min
pre	197	male	2012-08-05	2018-02-20	19	>= 5kg	116	Perimembranous VSD, PAH	acyanosis	no	no		no	no	no	no	no		no	yes	yes	no		no		2	class 1-2	no	no	yes	lasix, aldactone, lanoxin	no		2019-02-16	VSD closure	6	other	< 6.2 score	elective	elective	open heart	95	<240 min	57	< 85min	< 90min	closed and < 90 min	36	<60 min
pre	226	female	2010-10-27	2017-11-16	19.1	>= 5kg	115	ASD secundum	acyanosis	no	no		no	no	no	no	no		no	no	no	no		no		2	class 1-2	no	no	no		no		2018-04-21	ASD closure with glutaraldehyde treated autologous pericardial patch	3	other	< 6.2 score	elective	elective	open heart	110	<240 min	37	< 85min	< 90min	closed and < 90 min	25	<60 min
post	208	male	2019-01-30	2019-07-10	6.9	>= 5kg	70	Large anterior mal-aligned VSD, PAH, bilateral SVC	acyanosis	no	no		no	no	no	no	yes	emphysema air trapping at LUL	no	yes	yes	no		no		3	class 3-4	no	no	no		no		2019-11-30	VSD closure with subaortic ridge resection with TV repair	6	other	< 6.2 score	elective	elective	open heart	145	<240 min	87	>=85 min	< 90min	closed and < 90 min	65	>=60min
pre	186	male	2018-03-28	2018-03-28	5.8	>= 5kg	65	VSD. prolapsed RCC	acyanosis	no	no		no	no	no	no	no		no	no	no	no		no		2	class 1-2	no	no	yes	lasix, aldactone, lanoxin	no		2019-01-26	VSD closure	6	other	< 6.2 score	elective	elective	open heart	110	<240 min	45	< 85min	< 90min	closed and < 90 min	17	<60 min
post	116	female	2004-10-21	#NULL!	53	>= 5kg	154	Perimembranoud VSD	acyanosis	no	no		no	no	no	no	no		no	no	no	no		no		1	class 1-2	no	no	no		no		2019-06-15	VSD closure	6	other	< 6.2 score	elective	elective	open heart	155	<240 min	48	< 85min	< 90min	closed and < 90 min	35	<60 min
post	179	male	2018-04-27	2019-07-01	7.7	>= 5kg	74.5	Large inlet VSD with severe PHT	acyanosis	no	yes	Down syndrome	yes	no	no	no	yes	hypothyroid, GDD	no	yes	yes	no		no		3	class 3-4	no	no	no		no		2019-09-28	VSD closure	6	other	< 6.2 score	elective	elective	open heart	145	<240 min	58	< 85min	< 90min	closed and < 90 min	30	<60 min
post	123	male	2018-04-01	#NULL!	10	>= 5kg	75	Outlet VSD with prolape RCC	acyanosis	no	no		no	no	no	no	no		no	no	no	no		no		1	class 1-2	no	no	no		no		2019-06-22	VSD closure	6	other	< 6.2 score	elective	elective	open heart	80	<240 min	53	< 85min	< 90min	closed and < 90 min	26	<60 min
pre	144	male	2017-09-27	2017-10-27	8	>= 5kg	77	Perimembranous VSD	acyanosis	no	no		no	no	no	no	no		no	yes	no	no		no		2	class 1-2	no	no	no		no		2018-10-20	VSD closure	6	other	< 6.2 score	elective	elective	open heart	135	<240 min	86	>=85 min	< 90min	closed and < 90 min	69	>=60min
pre	88	male	2017-10-17	2018-03-01	7	>= 5kg	75	Perimembranous VSD	acyanosis	no	no		no	no	no	no	no		no	yes	no	no		no		2	class 1-2	no	no	no		no		2019-03-02	VSD closure	6	other	< 6.2 score	elective	elective	open heart	90	<240 min	58	< 85min	< 90min	closed and < 90 min	44	<60 min
post	222	male	2012-06-14	#NULL!	25.5	>= 5kg	122	Perimembranous VSD, subaortic ridge, RCC prolapse, no AR	acyanosis	no	no		no	no	no	no	no		no	no	no	no		no		1	class 1-2	no	no	no		no		2020-01-04	VSD closure, subaortic ridge resection	6	other	< 6.2 score	elective	elective	open heart	140	<240 min	86	>=85 min	< 90min	closed and < 90 min	70	>=60min
pre	57	female	2017-05-18	#NULL!	7.2	>= 5kg	101	Perimembranous VSD	acyanosis	no	no		no	no	no	no	yes	FTT	no	yes	no	no		no		3	class 3-4	no	no	no		no		2018-12-22	VSD closure	6	other	< 6.2 score	elective	elective	open heart	128	<240 min	30	< 85min	< 90min	closed and < 90 min	18	<60 min
pre	140	female	2018-05-18	2018-08-18	5.1	>= 5kg	69	Perimembranous VSD	acyanosis	no	no		no	no	no	no	no		no	yes	no	no		no		2	class 1-2	no	no	yes	lasix, aldactone, lanoxin	no		2018-10-06	VSD closure	6	other	< 6.2 score	elective	elective	open heart	145	<240 min	76	< 85min	< 90min	closed and < 90 min	40	<60 min
pre	124	male	2017-06-16	2017-09-15	5.4	>= 5kg	79	Perimembranous VSD, PFO	acyanosis	no	no		no	no	no	no	no		no	yes	no	no		no		2	class 1-2	no	no	yes	lasix,aldactone, captopril, lanoxin	no		2018-09-08	VSD closure	6	other	< 6.2 score	elective	elective	open heart	95	<240 min	58	< 85min	< 90min	closed and < 90 min	46	<60 min
post	203	female	2010-08-18	#NULL!	17.3	>= 5kg	122.5	Small perimembranous VSD, prolapse RCC of aortic valve	acyanosis	no	no		no	no	no	no	no		no	no	no	no		no		1	class 1-2	no	no	no		no		2019-11-23	VSD closure	6	other	< 6.2 score	elective	elective	open heart	90	<240 min	50	< 85min	< 90min	closed and < 90 min	36	<60 min
post	229	male	2019-09-09	2019-12-04	5	>= 5kg	59	Large perimembranous to inlet VSD, PDA, with PAH	acyanosis	no	no		no	no	no	no	no		no	yes	yes	no		no		2	class 1-2	no	no	yes	lasix,aldactone	no		2020-01-18	VSD closure, suture closure ASD, PDA ligation	6	other	< 6.2 score	elective	elective	open heart	135	<240 min	67	< 85min	< 90min	closed and < 90 min	52	<60 min
post	188	female	2018-12-06	2019-06-02	4.9	< 5 kg	68	Large PDA with perimembranous VSD	acyanosis	no	no		no	no	no	no	no		no	yes	no	no		no		3	class 3-4	no	no	no		no		2019-10-21	PDA ligation with VSD closure	6	other	< 6.2 score	elective	elective	open heart	70	<240 min	49	< 85min	< 90min	closed and < 90 min	24	<60 min
pre	56	female	2016-11-22	#NULL!	7.2	>= 5kg	82.5	Large perimembranous VSD	acyanosis	no	yes	Down dyndrome	yes	no	no	no	yes	FTT	no	yes	no	no		no		3	class 3-4	no	no	no		no		2018-12-22	VSD closure	6	other	< 6.2 score	elective	elective	open heart	135	<240 min	81	< 85min	< 90min	closed and < 90 min	58	<60 min
pre	158	female	2018-03-03	2018-03-03	6.6	>= 5kg	68	Perimembranous VSD	acyanosis	no	yes	Down syndrome	yes	no	no	no	no		no	yes	yes	no		no		2	class 1-2	no	no	yes	lasix, aldactone, captopril	no		2018-11-24	VSD closure	6	other	< 6.2 score	elective	elective	open heart	86	<240 min	55	< 85min	< 90min	closed and < 90 min	38	<60 min
post	187	male	2010-08-09	#NULL!	56.2	>= 5kg	999	VSD with prolapsed RCC	acyanosis	no	no		no	no	no	no	no		no	no	no	no		no		1	class 1-2	no	no	no		no		2019-10-19	VSD closure	6	other	< 6.2 score	elective	elective	open heart	110	<240 min	60	< 85min	< 90min	closed and < 90 min	40	<60 min
post	112	female	2017-05-03	#NULL!	9.7	>= 5kg	80	ASD, PAPVR	acyanosis	no	no		no	no	no	no	no		no	no	no	no		no		1	class 1-2	no	no	no		no		2019-05-25	Total repair	6	other	< 6.2 score	elective	elective	open heart	110	<240 min	60	< 85min	< 90min	closed and < 90 min	43	<60 min
post	243	female	2019-03-15	#NULL!	6.5	>= 5kg	67	Pm VSD mild to moderate MR due to anterior leaflet MVP and annular dilation DCRV	acyanosis	no	no		no	no	no	no	no		no	yes	no	no		yes	pneumonia with RS failure, E.feacium septicemia	3	class 3-4	no	no	no		no		2020-03-07	Total repair	6	other	< 6.2 score	elective	elective	open heart	105	<240 min	59	< 85min	< 90min	closed and < 90 min	40	<60 min
pre	265	male	2016-04-10	2016-04-10	11.5	>= 5kg	86	Subpulmonic VSD with partial closure by prolapsed RCC	acyanosis	no	no		no	no	no	no	no		no	yes	no	no		no		2	class 1-2	no	no	no		no		2018-07-21	VSD closure with gluteraldehyde treated pericardial patch	6	other	< 6.2 score	elective	elective	open heart	95	<240 min	50	< 85min	< 90min	closed and < 90 min	28	<60 min
post	159	male	2018-03-28	2018-03-28	10	>= 5kg	73	Perimembranous VSD, prolapsed RCC, mild AR	acyanosis	no	no		no	no	no	no	no		no	yes	no	no		no		2	class 1-2	no	no	no		no		2019-08-24	VSD closure	6	other	< 6.2 score	elective	elective	open heart	110	<240 min	56	< 85min	< 90min	closed and < 90 min	33	<60 min
pre	238	female	2017-05-06	#NULL!	6.49	>= 5kg	73	Perimembranous VSD	acyanosis	no	no		no	no	no	no	no		no	yes	no	no		no		3	class 3-4	no	no	yes	Aldactone	no		2018-05-24	VSD closure with autologous pericardium	6	other	< 6.2 score	elective	elective	open heart	170	<240 min	76	< 85min	< 90min	closed and < 90 min	50	<60 min
pre	203	female	2018-04-02	#NULL!	5.5	>= 5kg	70	Perimembranous VSD	acyanosis	no	no		no	no	no	no	no		no	yes	no	no		no		2	class 1-2	no	no	yes	lasix, lanoxin, aldactone	no		2019-02-23	VSD closure	6	other	< 6.2 score	elective	elective	open heart	125	<240 min	71	< 85min	< 90min	closed and < 90 min	47	<60 min
pre	256	female	2017-06-17	2018-02-22	7.8	>= 5kg	72	Inlet VSD	acyanosis	no	no		no	no	no	no	no		no	yes	no	no		no		3	class 3-4	no	no	no		no		2018-06-30	VSD closure using autologous glutaldehyde treated pericardial patch	6	other	< 6.2 score	elective	elective	open heart	80	<240 min	68	< 85min	< 90min	closed and < 90 min	51	<60 min
pre	27	female	2018-01-08	2018-01-08	4.9	< 5 kg	84	Large perimembranous VSD, small ASD	acyanosis	no	no		no	no	no	no	yes	Congenital hypothyroid, FTT	no	yes	yes	no		no		3	class 3-4	no	no	no		no		2018-10-20	VSD and ASD closure	6	other	< 6.2 score	elective	elective	open heart	130	<240 min	84	< 85min	< 90min	closed and < 90 min	60	>=60min
pre	243	male	2017-09-06	2018-03-01	6.9	>= 5kg	73	Large perimembranous VSD	acyanosis	no	no		no	no	no	no	no		no	yes	no	no		no		3	class 3-4	no	no	no		no		2018-06-02	VSD closure using gluteraldehyde-treated autologous pericardial patch	6	other	< 6.2 score	elective	elective	open heart	105	<240 min	48	< 85min	< 90min	closed and < 90 min	28	<60 min
post	186	female	2018-12-09	2018-12-09	5.42	>= 5kg	65	Perimembranous to inlet VSD with PDA	acyanosis	no	yes	Down syndrome	yes	no	no	no	no		no	yes	yes	no		no		3	class 3-4	no	no	no		no		2019-10-19	VSD closure with PDA ligation	6	other	< 6.2 score	elective	elective	open heart	135	<240 min	75	< 85min	< 90min	closed and < 90 min	52	<60 min
post	198	male	2017-12-12	#NULL!	12	>= 5kg	87	Perimembranous VSD with prolapse RCC with trivial TR	acyanosis	no	no		no	no	no	no	no		no	no	no	no		no		1	class 1-2	no	no	no		no		2019-11-16	VSD closure	6	other	< 6.2 score	elective	elective	open heart	100	<240 min	39	< 85min	< 90min	closed and < 90 min	29	<60 min
post	160	male	2018-02-15	2018-02-26	11.5	>= 5kg	79	Perimembranous VSD	acyanosis	no	no		no	no	no	no	no		no	yes	no	no		no		2	class 1-2	no	no	yes	lasix,aldactone	no		2019-08-24	VSD closure	6	other	< 6.2 score	elective	elective	open heart	125	<240 min	64	< 85min	< 90min	closed and < 90 min	42	<60 min
post	82	male	2018-05-02	2018-06-01	8.8	>= 5kg	80	Perimembranous VSD with subaortic rudge with bilateral SVC	acyanosis	no	no		no	no	no	no	no		no	yes	no	no		no		3	class 3-4	no	no	yes	lasix,aldactone,lanoxin	no		2020-02-18	VSD closure	6	other	< 6.2 score	elective	elective	open heart	135	<240 min	83	< 85min	< 90min	closed and < 90 min	59	<60 min
post	73	female	2019-12-09	2020-01-29	3.2	< 5 kg	53	Large perimembranous VSD	acyanosis	no	no		no	no	no	no	no		no	yes	no	no		no		2	class 1-2	no	no	yes	lasix,aldactone,captopril	no		2020-03-04	VSD closure	6	other	< 6.2 score	elective	elective	open heart	185	<240 min	89	>=85 min	< 90min	closed and < 90 min	64	>=60min
pre	189	male	2018-02-17	2018-02-18	6	>= 5kg	70	VSD	acyanosis	no	no		no	no	no	no	no		no	yes	no	no		no		2	class 1-2	no	no	yes	lasix, aldactone, lanoxin	no		2019-02-02	VSD closure	6	other	< 6.2 score	elective	elective	open heart	120	<240 min	77	< 85min	< 90min	closed and < 90 min	58	<60 min
pre	278	male	2017-07-19	#NULL!	6.2	>= 5kg	68	DORV with subaortic VSD	cyanosis	no	no		no	no	no	no	no		no	yes	no	no		no		3	class 3-4	no	no	no		no		2018-06-20	VSD closure	6	other	< 6.2 score	elective	elective	open heart	150	<240 min	83	< 85min	< 90min	closed and < 90 min	54	<60 min
pre	113	female	2017-09-12	#NULL!	5.5	>= 5kg	62	Large outlet VSD	acyanosis	no	no		no	no	no	no	no		no	yes	no	no		yes	pneumonia	3	class 3-4	no	no	no		no		2018-08-18	VSD closure	6	other	< 6.2 score	elective	elective	open heart	130	<240 min	64	< 85min	< 90min	closed and < 90 min	47	<60 min
post	122	female	2018-09-18	2018-09-18	5.8	>= 5kg	68	Perimembranous VSD with flap PFO	acyanosis	no	no		no	no	no	no	no		no	yes	no	no		no		3	class 3-4	no	no	yes	a	no		2019-06-22	VSD closure	6	other	< 6.2 score	elective	elective	open heart	130	<240 min	65	< 85min	< 90min	closed and < 90 min	45	<60 min
pre	148	male	2013-08-15	2018-07-04	18.8	>= 5kg	118	Perimembranous VSD, mild AR	acyanosis	no	no		no	no	no	no	no		no	yes	no	no		no		2	class 1-2	no	no	no		no		2018-11-03	VSD closure	6	other	< 6.2 score	elective	elective	open heart	99	<240 min	44	< 85min	< 90min	closed and < 90 min	31	<60 min
post	102	female	2017-02-03	2017-08-07	14	>= 5kg	90	Moderate outlet VSD	acyanosis	no	no		no	no	no	no	no		no	no	no	no		no		2	class 1-2	no	no	no		no		2019-05-11	VSD closure	6	other	< 6.2 score	elective	elective	open heart	125	<240 min	58	< 85min	< 90min	closed and < 90 min	39	<60 min
pre	153	male	2013-06-02	2013-08-02	16.4	>= 5kg	109	Perimembranous VSD, mild AR	acyanosis	no	no		no	no	no	no	no		no	yes	no	no		no		2	class 1-2	no	no	no		no		2018-11-17	VSD closure	6	other	< 6.2 score	elective	elective	open heart	60	<240 min	51	< 85min	< 90min	closed and < 90 min	30	<60 min
pre	193	male	2010-10-27	2010-10-30	20	>= 5kg	124	VSD,, prolapsed RCC, mild AR	acyanosis	no	yes	DiGeorge syndrome	no	yes	no	no	no		no	no	no	no		no		1	class 1-2	no	no	no		no		2019-02-09	VSD closure	6	other	< 6.2 score	elective	elective	open heart	110	<240 min	47	< 85min	< 90min	closed and < 90 min	22	<60 min
pre	204	female	2018-07-22	#NULL!	5.5	>= 5kg	67	Perimembranous VSD	acyanosis	no	no		no	no	no	no	no		no	yes	no	no		no		2	class 1-2	no	no	yes	lasix, aldactone	no		2019-02-23	VSD closure	6	other	< 6.2 score	elective	elective	open heart	120	<240 min	82	< 85min	< 90min	closed and < 90 min	50	<60 min
post	202	male	2016-06-15	2016-07-02	14.2	>= 5kg	99	Moderate perimembranous extend to inlet VSD with TV aneurysm	acyanosis	no	no		no	no	no	no	no		no	yes	no	no		no		1	class 1-2	no	no	no		no		2019-11-23	VSD closure	6	other	< 6.2 score	elective	elective	open heart	90	<240 min	52	< 85min	< 90min	closed and < 90 min	35	<60 min
pre	116	female	2010-09-09	#NULL!	17	>= 5kg	118	Small to moderate size outlet VSD with mild AR, prolapse RCC, mild CoA	acyanosis	no	no		no	no	no	no	no		no	no	no	no		no		1	class 1-2	no	no	no		no		2018-08-25	VSD closure with PDA internal closure	6	other	< 6.2 score	elective	elective	open heart	95	<240 min	51	< 85min	< 90min	closed and < 90 min	33	<60 min
pre	210	female	2011-02-17	2011-02-23	22	>= 5kg	130	VSD proplpased RCC mild AR	acyanosis	no	no		no	no	no	no	no		no	yes	no	no		no		2	class 1-2	no	no	yes	lasix, aldctone	no		2019-03-16	VSD closure	6	other	< 6.2 score	elective	elective	open heart	135	<240 min	66	< 85min	< 90min	closed and < 90 min	40	<60 min
post	221	male	2019-05-02	#NULL!	9.4	>= 5kg	81.5	Moderate size VSD with prolapsed RCC , AR	acyanosis	no	no		no	no	no	no	no		no	yes	no	no		no		2	class 1-2	no	no	yes	lasix	no		2020-01-04	VSD closure	6	other	< 6.2 score	elective	elective	open heart	130	<240 min	79	< 85min	< 90min	closed and < 90 min	59	<60 min
post	75	male	2013-09-05	2013-09-05	20	>= 5kg	115	small perimembranous VSD	acyanosis	no	no		no	no	no	no	no		no	no	no	no		no		2	class 1-2	no	no	no		no		2020-03-07	VSD closure	6	other	< 6.2 score	elective	elective	open heart	75	<240 min	41	< 85min	< 90min	closed and < 90 min	19	<60 min
pre	114	female	2017-10-05	2017-10-05	6.6	>= 5kg	71	Perimembranous VSD	acyanosis	no	no		no	no	no	no	no		no	yes	no	no		no		3	class 3-4	no	no	yes	lasix,aldactone	no		2018-08-19	VSD closure	6	other	< 6.2 score	elective	elective	open heart	75	<240 min	43	< 85min	< 90min	closed and < 90 min	27	<60 min
pre	249	male	2017-03-08	2018-03-06	8.8	>= 5kg	79	Outlet VSD	acyanosis	no	no		no	no	no	no	yes	Pulmonary TB	no	yes	no	no		no		3	class 3-4	no	no	no		no		2018-06-16	VSD closure with glutaraldehyde treated autologous pericardial patch	6	other	< 6.2 score	elective	elective	open heart	110	<240 min	54	< 85min	< 90min	closed and < 90 min	35	<60 min
post	130	male	2018-01-01	#NULL!	7.3	>= 5kg	74	Secundum ASD, perimembranous VSD	acyanosis	no	no		no	no	no	no	no		no	yes	no	no		no		3	class 3-4	no	no	yes	lanoxin	no		2019-07-06	ASD and VSD closure	6	other	< 6.2 score	elective	elective	open heart	125	<240 min	71	< 85min	< 90min	closed and < 90 min	50	<60 min
pre	149	female	2017-10-07	2017-10-07	7	>= 5kg	71	Perimembranous VSD, PAH	acyanosis	no	no		no	no	no	no	no		no	yes	yes	no		no		2	class 1-2	no	no	yes	lasix,aladctone,captopril	no		2018-11-03	VSD closure	6	other	< 6.2 score	elective	elective	open heart	96	<240 min	60	< 85min	< 90min	closed and < 90 min	41	<60 min
pre	106	male	2017-11-19	2018-04-09	6.1	>= 5kg	67	Moderate perimembranous VSD flap PFO	acyanosis	no	no		no	no	no	no	no		no	yes	no	no		no		3	class 3-4	no	no	yes	aldactone	no		2018-08-04	VSD closure	6	other	< 6.2 score	elective	elective	open heart	105	<240 min	47	< 85min	< 90min	closed and < 90 min	31	<60 min
pre	233	female	2016-11-23	#NULL!	8.4	>= 5kg	79	Large perimembranous VSD	acyanosis	no	yes	Down Syndrome	yes	no	no	no	yes	Hypothyroidism	no	yes	yes	no		no		3	class 3-4	no	no	yes	Lasix,aldactone	no		2018-05-05	VSD Closure with gluteraldehyde-treated autologous pericardial patch	6	other	< 6.2 score	elective	elective	open heart	120	<240 min	61	< 85min	< 90min	closed and < 90 min	44	<60 min
post	199	male	2018-10-25	2018-10-25	5.4	>= 5kg	63	Large inlet VSD	acyanosis	no	no		no	no	no	no	no		no	yes	no	no		no		3	class 3-4	no	no	no		no		2019-11-16	VSD closure	6	other	< 6.2 score	elective	elective	open heart	155	<240 min	71	< 85min	< 90min	closed and < 90 min	53	<60 min
post	141	male	2018-12-07	2019-02-13	5.4	>= 5kg	64	Perimembranous VSD	acyanosis	no	no		no	no	no	no	no		no	yes	no	no		no		3	class 3-4	no	no	yes	aldactone	no		2019-07-23	VSD closure	6	other	< 6.2 score	elective	elective	open heart	110	<240 min	70	< 85min	< 90min	closed and < 90 min	48	<60 min
post	15	female	2005-10-26	2005-12-01	43.5	>= 5kg	142	Cortriatriatum sinister with obstruction	acyanosis	no	no		no	no	no	no	yes	Asthma, ADHD	no	no	no	no		no		2	class 1-2	no	no	no		no		2019-07-20	Cotriatriatum membrane resection	6	other	< 6.2 score	elective	elective	open heart	75	<240 min	35	< 85min	< 90min	closed and < 90 min	20	<60 min
post	101	female	2018-09-06	2019-03-15	4.7	< 5 kg	67	Large inlet extend to muscular VSD with PHT with moderate MR	acyanosis	no	no		no	no	no	no	no		no	yes	yes	no		no		3	class 3-4	no	no	no		no		2019-05-11	VSD closure	6	other	< 6.2 score	elective	elective	open heart	100	<240 min	71	< 85min	< 90min	closed and < 90 min	45	<60 min
pre	127	female	2017-12-06	#NULL!	5.3	>= 5kg	69	Perimembranous VSD, PFO	acyanosis	no	no		no	no	no	no	no		no	yes	no	no		no		2	class 1-2	no	no	yes	lasix, captopril, lanoxin	no		2018-09-11	VSD closure	6	other	< 6.2 score	urgency	emergency or urgency	open heart	95	<240 min	47	< 85min	< 90min	closed and < 90 min	33	<60 min
pre	192	female	2017-05-24	#NULL!	9.8	>= 5kg	84	VSD	acyanosis	no	no		no	no	no	no	no		no	yes	no	no		no		2	class 1-2	no	no	yes	lasix, aldactone, enalapril	no		2019-02-09	VSD closure	6	other	< 6.2 score	elective	elective	open heart	140	<240 min	64	< 85min	< 90min	closed and < 90 min	40	<60 min
post	241	male	2007-02-19	#NULL!	50	>= 5kg	162	Small perimembranous VSD with prolapsed RCC with mild AR	acyanosis	no	no		no	no	no	no	no		no	no	no	no		no		1	class 1-2	no	no	no		no		2020-02-29	VSD closure	6	other	< 6.2 score	elective	elective	open heart	120	<240 min	44	< 85min	< 90min	closed and < 90 min	28	<60 min
post	246	male	2014-02-28	#NULL!	22.5	>= 5kg	115	Small outlet VSD, prolapse RCC, mild AR	acyanosis	no	no		no	no	no	no	no		no	no	no	no		no		1	class 1-2	no	no	no		no		2020-02-15	VSD closure	6	other	< 6.2 score	elective	elective	open heart	75	<240 min	37	< 85min	< 90min	closed and < 90 min	15	<60 min
post	26	male	2012-07-21	2012-07-21	20.7	>= 5kg	118	Perimembranous VSD with ASD secundum	acyanosis	no	no		no	no	no	no	no		no	yes	no	no		no		2	class 1-2	no	no	no		no		2019-10-26	VSD closure and ASD closure	6	other	< 6.2 score	elective	elective	open heart	115	<240 min	39	< 85min	< 90min	closed and < 90 min	53	<60 min
pre	71	male	2016-03-29	#NULL!	8.3	>= 5kg	85	Large perimembranous to inlet VSD, PHT	acyanosis	no	no		no	no	no	no	yes	FTT	no	yes	yes	no		no		3	class 3-4	no	no	no		no		2019-03-02	VSD closure	6	other	< 6.2 score	elective	elective	open heart	90	<240 min	53	< 85min	< 90min	closed and < 90 min	31	<60 min
pre	169	male	2014-01-19	2014-01-19	17	>= 5kg	107.3	Perimembranous VSD	acyanosis	no	no		no	no	no	no	no		no	yes	no	no		no		2	class 1-2	no	no	yes	lasix, aldactone	no		2019-01-05	VSD closure	6	other	< 6.2 score	elective	elective	open heart	100	<240 min	42	< 85min	< 90min	closed and < 90 min	29	<60 min
post	226	male	2014-08-26	#NULL!	16.5	>= 5kg	112	Small Pm VSD with prolapsed RCC, no AR	acyanosis	no	no		no	no	no	no	no		no	no	no	no		no		1	class 1-2	no	no	no		no		2020-01-11	VSD closure	6	other	< 6.2 score	elective	elective	open heart	125	<240 min	59	< 85min	< 90min	closed and < 90 min	29	<60 min
pre	188	male	2012-10-05	2012-01-29	18	>= 5kg	118	CoA, VSD s/p CoA repair 8.01.2013	acyanosis	no	no		no	no	no	no	no		no	yes	no	yes	Coarctectomy	no		2	class 1-2	no	no	no		no		2019-02-01	VSD closure	6	other	< 6.2 score	elective	elective	open heart	160	<240 min	51	< 85min	< 90min	closed and < 90 min	37	<60 min
pre	217	male	2008-04-01	#NULL!	44.6	>= 5kg	130	VSD	acyanosis	no	no		no	no	no	no	no		no	no	no	no		no		2	class 1-2	no	no	no		no		2019-03-30	VSD closure	6	other	< 6.2 score	elective	elective	open heart	140	<240 min	65	< 85min	< 90min	closed and < 90 min	44	<60 min
post	90	male	2016-10-19	2019-01-28	11.5	>= 5kg	90	Inlet VSD, subvalvular PS, subaortic ridge	acyanosis	no	no		no	no	no	no	no		no	yes	no	no		no		1	class 1-2	no	no	no		no		2019-04-27	VSD closure	6	other	< 6.2 score	elective	elective	open heart	80	<240 min	54	< 85min	< 90min	closed and < 90 min	42	<60 min
pre	198	male	2014-10-23	#NULL!	15.5	>= 5kg	108	VSD, prolapsed RCC, AR	acyanosis	no	no		no	no	no	no	no		no	no	no	no		no		1	class 1-2	no	no	no		no		2019-02-16	VSD closure	6	other	< 6.2 score	elective	elective	open heart	85	<240 min	45	< 85min	< 90min	closed and < 90 min	27	<60 min
post	247	male	2008-08-26	#NULL!	37.7	>= 5kg	132	Small perimembranous VSD with prolapse RCC, no AR	acyanosis	no	no		no	no	no	no	no		no	no	no	no		no		1	class 1-2	no	no	no		no		2020-02-15	VSD closure	6	other	< 6.2 score	elective	elective	open heart	120	<240 min	64	< 85min	< 90min	closed and < 90 min	38	<60 min
pre	117	male	2015-11-14	2016-05-01	11.5	>= 5kg	85.5	Perimembranous VSD with prolapsed RCC with mild AR	acyanosis	no	no		no	no	no	no	no		no	no	no	no		no		1	class 1-2	no	no	no		no		2018-08-25	VSD closure	6	other	< 6.2 score	elective	elective	open heart	100	<240 min	53	< 85min	< 90min	closed and < 90 min	41	<60 min
post	149	male	2010-06-01	2011-07-01	23	>= 5kg	127	Perimembranous to inlet VSD with prolapsed RCC	acyanosis	no	no		no	no	no	no	no		no	no	no	no		no		1	class 1-2	no	no	no		no		2019-08-03	VSD closure	6	other	< 6.2 score	elective	elective	open heart	130	<240 min	68	< 85min	< 90min	closed and < 90 min	93	>=60min
post	252	male	2015-01-27	2015-05-01	14.5	>= 5kg	109	Dextrocardia, ccTGA, VSD	cyanosis	no	no		no	no	no	no	no		no	yes	yes	no		no		1	class 1-2	no	no	yes	aldactone,carvedilol	no		2020-02-14	VSD closure	6	other	< 6.2 score	elective	elective	open heart	110	<240 min	58	< 85min	< 90min	closed and < 90 min	44	<60 min
post	77	female	2018-07-13	2018-12-12	10	>= 5kg	82	Large VSD with hypoplastic arch	acyanosis	no	no		no	no	no	no	no		no	yes	no	no		no		3	class 3-4	no	no	yes	lasix,aldactone	no		2020-02-22	VSD closure	6	other	< 6.2 score	elective	elective	open heart	80	<240 min	44	< 85min	< 90min	closed and < 90 min	31	<60 min
post	245	female	2011-10-19	#NULL!	16.3	>= 5kg	94	Large anterior malaligned Pm VSD, mild aortic overide, mild subvalvular PS	acyanosis	no	no		no	no	no	no	no		no	yes	no	no		no		2	class 1-2	no	no	yes	Digoxin	no		2020-02-22	VSD closure with infundibulectomy	6	other	< 6.2 score	elective	elective	open heart	90	<240 min	57	< 85min	< 90min	closed and < 90 min	37	<60 min
pre	281	male	2017-03-04	#NULL!	7.5	>= 5kg	75	DILV with VSD with TGA with moderate MS s/p PA banding	cyanosis	no	no		no	no	no	no	yes	corpus collosum agenesis	no	yes	no	yes	MPA banding 03.04.2017	yes	Pneumonia	3	class 3-4	no	no	no		no		2018-07-06	Atrial septectomy	5	other	< 6.2 score	elective	elective	open heart	145	<240 min	24	< 85min	< 90min	closed and < 90 min	9	<60 min
post	213	male	2019-04-09	2019-04-09	7.9	>= 5kg	69	Single coronary artery from left cusp, coronary AV fistula from RCA to RV inlet	acyanosis	no	no		no	no	no	no	no		no	no	no	no		no		1	class 1-2	no	no	no		no		2019-12-12	coronary fistula closure by internal ligation	4	other	< 6.2 score	elective	elective	open heart	100	<240 min	31	< 85min	< 90min	closed and < 90 min	13	<60 min
post	113	female	2017-02-21	2017-02-21	6.6	>= 5kg	69	Partial AVSD, MV cleft, mild MR	acyanosis	no	no		no	no	no	no	no		no	yes	no	no		no		3	class 3-4	no	no	no		no		2019-05-25	Total repair	4	other	< 6.2 score	elective	elective	open heart	205	<240 min	88	>=85 min	< 90min	closed and < 90 min	72	>=60min
post	242	female	2019-02-09	2019-04-01	10.8	>= 5kg	88	Moderate size secundum ASD with PAPVR	acyanosis	no	no		no	no	no	no	no		no	no	no	no		no		1	class 1-2	no	no	no		no		2020-03-02	ASD closure with baffle tunnel of pulmonary vein	3	other	< 6.2 score	elective	elective	open heart	155	<240 min	87	>=85 min	< 90min	closed and < 90 min	54	<60 min
post	196	male	2013-06-07	2019-09-30	24.5	>= 5kg	123.5	Large ASD with mild TR	acyanosis	no	no		no	no	no	no	no		no	yes	no	no		no		2	class 1-2	no	no	yes	aldactone	no		2019-11-09	ASD closure	3	other	< 6.2 score	elective	elective	open heart	90	<240 min	50	< 85min	< 90min	closed and < 90 min	29	<60 min
post	205	female	2019-09-08	2019-09-10	3.5	< 5 kg	56	Coronary sinus type TAPVR with ASD secundum with valvular PS	cyanosis	no	no		no	no	no	no	no		no	yes	no	no		no		3	class 3-4	no	no	no		no		2019-11-25	Coronary sinus unroof with ASD closure	3	other	< 6.2 score	elective	elective	open heart	130	<240 min	77	< 85min	< 90min	closed and < 90 min	41	<60 min
pre	178	female	2010-09-08	2018-09-14	20	>= 5kg	127	ASD, mild MS	acyanosis	no	no		no	no	no	no	no		no	yes	yes	no		no		2	class 1-2	no	no	yes	lasix, aldactone, pen V	no		2019-01-13	ASD closure	3	other	< 6.2 score	elective	elective	open heart	80	<240 min	38	< 85min	< 90min	closed and < 90 min	29	<60 min
pre	177	female	2016-06-16	2016-10-16	8.5	>= 5kg	85	ASD	acyanosis	no	no		no	no	no	no	yes	Multiple anomaly, microcephaly, GDD	no	yes	no	no		no		2	class 1-2	no	no	yes	lasix, aldactone	no		2019-01-13	ASD closure	3	other	< 6.2 score	elective	elective	open heart	60	<240 min	8	< 85min	< 90min	closed and < 90 min	8	<60 min
post	117	female	2017-07-08	2019-05-01	9.3	>= 5kg	82	Large secundum ASD	acyanosis	no	no		no	no	no	no	no		no	yes	no	no		no		3	class 3-4	no	no	no		no		2019-06-15	ASD closure	3	other	< 6.2 score	elective	elective	open heart	92	<240 min	36	< 85min	< 90min	closed and < 90 min	25	<60 min
pre	214	male	2018-03-25	2018-04-04	6.6	>= 5kg	70	ASD, PDA	acyanosis	no	no		no	no	no	no	no		no	yes	no	no		no		2	class 1-2	no	no	yes	lasix, aldactone, lanoxin	no		2019-03-23	ASD closure, PDA ligation	3	other	< 6.2 score	elective	elective	open heart	75	<240 min	33	< 85min	< 90min	closed and < 90 min	13	<60 min
post	126	female	2016-12-12	#NULL!	13	>= 5kg	98	Large ASD secundum	acyanosis	no	no		no	no	no	no	no		no	no	no	no		no		1	class 1-2	no	no	no		no		2019-06-28	ASD closure	3	other	< 6.2 score	elective	elective	open heart	125	<240 min	41	< 85min	< 90min	closed and < 90 min	23	<60 min
post	207	male	2013-01-10	#NULL!	17	>= 5kg	115.5	Large secundum ASD, inadequate rim s/p failed ASD device closure	acyanosis	no	no		no	no	no	no	no		no	no	no	no		no		1	class 1-2	no	no	no		no		2019-11-30	ASD closure	3	other	< 6.2 score	elective	elective	open heart	145	<240 min	60	< 85min	< 90min	closed and < 90 min	36	<60 min
post	225	male	2017-05-19	#NULL!	11.8	>= 5kg	94	Large ASD secundum with PHT	acyanosis	no	no		no	no	no	no	yes	Ambiguous genitalia with hypospasdia	no	yes	yes	no		no		2	class 1-2	no	no	no		no		2020-01-11	ASD closure	3	other	< 6.2 score	elective	elective	open heart	105	<240 min	43	< 85min	< 90min	closed and < 90 min	23	<60 min
pre	209	female	2016-03-08	#NULL!	13	>= 5kg	97.5	ASD	acyanosis	no	no		no	no	no	no	no		no	no	no	no		no		2	class 1-2	no	no	yes	lasix, aldactone	no		2019-03-16	ASD closure	3	other	< 6.2 score	elective	elective	open heart	95	<240 min	36	< 85min	< 90min	closed and < 90 min	15	<60 min
post	235	male	2018-02-12	#NULL!	9.2	>= 5kg	81	Large secundum ASD	acyanosis	no	no		no	no	no	no	no		no	yes	no	no		no		2	class 1-2	no	no	yes	lasix,aldactone	no		2020-01-25	ASD closure	3	other	< 6.2 score	elective	elective	open heart	75	<240 min	30	< 85min	< 90min	closed and < 90 min	18	<60 min
pre	224	female	2011-08-08	#NULL!	15.1	>= 5kg	106	ASD secundum	acyanosis	no	no		no	no	no	no	yes	PA sling with complete tracheal ring, chronic lung disease, bilatreal nephrocalcinosis	no	yes	no	yes	PA with reimplantation of LPA to MPA 30.08.2011	no		2	class 1-2	no	no	yes	HCTZ,aldactone	no		2018-04-19	Redo ASD closure with Dracon patch	3	other	< 6.2 score	elective	elective	open heart	210	<240 min	66	< 85min	< 90min	closed and < 90 min	43	<60 min
pre	146	female	2013-07-10	2013-08-10	13.4	>= 5kg	98	ASD	acyanosis	no	no		no	no	no	no	no		no	yes	no	no		no		2	class 1-2	no	no	yes	lasix, aldactone	no		2018-10-27	ASD closure	3	other	< 6.2 score	elective	elective	open heart	80	<240 min	27	< 85min	< 90min	closed and < 90 min	14	<60 min
post	64	female	2015-07-18	2019-03-18	14.5	>= 5kg	96	Large secundum ASD, mild MVP, mild MR	acyanosis	no	no		no	no	no	no	no		no	yes	no	no		no		1	class 1-2	no	no	no		no		2019-04-20	ASD closure	3	other	< 6.2 score	elective	elective	open heart	135	<240 min	51	< 85min	< 90min	closed and < 90 min	23	<60 min
pre	136	female	2013-03-27	2018-06-03	24	>= 5kg	115	ASD	acyanosis	no	no		no	no	no	no	no		no	yes	no	no		no		2	class 1-2	no	no	no		no		2018-09-29	ASD closure	3	other	< 6.2 score	elective	elective	open heart	80	<240 min	30	< 85min	< 90min	closed and < 90 min	9	<60 min
pre	218	female	2013-05-03	#NULL!	12	>= 5kg	100	ASD	acyanosis	no	no		no	no	no	no	yes	Bilateral microphthalmia, glaucoma, macrocephaly	no	yes	no	no		no		2	class 1-2	no	no	yes	lasix, ladactone, lanoxin	no		2019-03-30	ASD closure	3	other	< 6.2 score	elective	elective	open heart	100	<240 min	47	< 85min	< 90min	closed and < 90 min	26	<60 min
pre	182	male	2013-10-09	#NULL!	14	>= 5kg	106	ASD	acyanosis	no	no		no	no	no	no	no		no	no	no	no		no		2	class 1-2	no	no	yes	lasix, aldactone	no		2019-01-17	ASD closure	3	other	< 6.2 score	elective	elective	open heart	95	<240 min	45	< 85min	< 90min	closed and < 90 min	28	<60 min
pre	110	male	2009-06-28	2017-07-01	18	>= 5kg	120	Sinus venosus ASD	acyanosis	no	no		no	no	no	no	no		no	no	no	no		no		1	class 1-2	no	no	no		no		2018-08-09	ASD closure	3	other	< 6.2 score	elective	elective	open heart	140	<240 min	61	< 85min	< 90min	closed and < 90 min	41	<60 min
pre	161	male	2013-10-08	#NULL!	14.7	>= 5kg	99	ASD	acyanosis	no	yes	Down syndrome	yes	no	no	no	yes	CKD stage II, hypothyroidism	no	yes	no	no		no		2	class 1-2	no	no	yes	lasix	no		2018-12-01	ASD closure	3	other	< 6.2 score	elective	elective	open heart	110	<240 min	34	< 85min	< 90min	closed and < 90 min	15	<60 min
pre	152	female	2007-03-16	2017-09-05	23.5	>= 5kg	132	ASD	acyanosis	no	no		no	no	no	no	no		no	yes	no	no		no		3	class 3-4	no	no	yes	lasix, aldactone, lanoxin	no		2018-11-17	ASD closure with fresh autologous pericardial patch	3	other	< 6.2 score	elective	elective	open heart	95	<240 min	65	< 85min	< 90min	closed and < 90 min	21	<60 min
post	200	female	2016-10-13	#NULL!	12	>= 5kg	92	Inferior sinus venosus ASD with PAPVC	acyanosis	no	no		no	no	no	no	no		no	yes	no	no		yes	RSV pneumonia	2	class 1-2	no	no	no		no		2019-11-18	Total repair	3	other	< 6.2 score	elective	elective	open heart	110	<240 min	61	< 85min	< 90min	closed and < 90 min	39	<60 min
post	171	female	2011-12-30	2019-02-15	29.4	>= 5kg	126	Large ASD secundum fenestration of interatrial septum	acyanosis	no	no		no	no	no	no	no		no	no	no	no		yes	UTI	1	class 1-2	no	no	no		yes	Cefotaxime	2019-09-12	Primary ASD closure	3	other	< 6.2 score	elective	elective	open heart	158	<240 min	50	< 85min	< 90min	closed and < 90 min	30	<60 min
pre	135	female	2015-03-13	#NULL!	8.6	>= 5kg	83	ASD	acyanosis	no	yes	hypomelanosis of Ito, hemihypertrophy Rt	no	no	no	yes	no		no	yes	no	no		no		2	class 1-2	no	no	no		no		2018-09-29	ASD closure	3	other	< 6.2 score	elective	elective	open heart	70	<240 min	26	< 85min	< 90min	closed and < 90 min	9	<60 min
post	125	female	2011-06-07	#NULL!	84	>= 5kg	126	Large secundum ASD	acyanosis	no	yes	Chromosome disorder	no	no	no	yes	yes	Morbid obesity, severe OSA	no	no	yes	no		no		1	class 1-2	no	no	yes	lasix,aldacrone	no		2019-06-27	ASD closure	3	other	< 6.2 score	elective	elective	open heart	135	<240 min	39	< 85min	< 90min	closed and < 90 min	24	<60 min
pre	215	female	2013-07-22	#NULL!	12	>= 5kg	103	SV ASD	acyanosis	no	no		no	no	no	no	yes	Omphalocele s/p repair	no	yes	no	no		no		2	class 1-2	no	no	yes	lasix, aldactone	no		2019-03-23	ASD closure	3	other	< 6.2 score	elective	elective	open heart	95	<240 min	37	< 85min	< 90min	closed and < 90 min	23	<60 min
pre	118	female	2010-11-19	2017-03-25	25.5	>= 5kg	133	ASD with SVT	acyanosis	no	no		no	no	no	no	no		no	no	no	no		no		1	class 1-2	no	no	no		no		2018-08-27	ASD closure	3	other	< 6.2 score	elective	elective	open heart	200	<240 min	78	< 85min	< 90min	closed and < 90 min	43	<60 min
pre	82	female	2015-02-10	2015-05-01	16	>= 5kg	100	Large ASD secundum with mild valvular PS	acyanosis	no	no		no	no	no	no	no		no	no	no	no		no		2	class 1-2	no	no	no		no		2019-03-21	ASD closure	3	other	< 6.2 score	elective	elective	open heart	210	<240 min	84	< 85min	< 90min	closed and < 90 min	60	>=60min
pre	264	female	2013-11-30	#NULL!	18.2	>= 5kg	80	ASD secundum	acyanosis	no	no		no	no	no	no	no		no	yes	no	no		no		1	class 1-2	no	no	yes	Lasix	no		2018-07-19	ASD closure by direct suture	3	other	< 6.2 score	elective	elective	open heart	115	<240 min	37	< 85min	< 90min	closed and < 90 min	15	<60 min
pre	157	male	2013-11-29	2018-10-16	13.5	>= 5kg	118	ASD	acyanosis	no	no		no	no	no	no	no		no	no	no	no		no		2	class 1-2	no	no	yes	lasix, aldactone	no		2018-11-24	ASD closure	3	other	< 6.2 score	elective	elective	open heart	70	<240 min	25	< 85min	< 90min	closed and < 90 min	15	<60 min
pre	257	male	2014-03-15	#NULL!	13.4	>= 5kg	79	ASD secundum	acyanosis	no	no		no	no	no	no	no		no	yes	no	no		no		3	class 3-4	no	no	no		no		2018-06-30	ASD closure	3	other	< 6.2 score	elective	elective	open heart	60	<240 min	24	< 85min	< 90min	closed and < 90 min	12	<60 min
post	148	female	2014-12-04	#NULL!	12	>= 5kg	93	Large ASD secundum	acyanosis	no	no		no	no	no	no	yes	Multiple anomaly, Hirschprung's disease s/p total repair, GDD	no	no	no	no		no		3	class 3-4	no	no	no		no		2019-08-03	ASD closure	3	other	< 6.2 score	elective	elective	open heart	80	<240 min	40	< 85min	< 90min	closed and < 90 min	20	<60 min
post	135	female	2004-06-20	2018-08-31	51	>= 5kg	157	Secundum ASD	acyanosis	no	no		no	no	no	no	yes	HIV infection	no	no	no	no		no		1	class 1-2	no	no	no		no		2019-07-06	ASD closure	3	other	< 6.2 score	elective	elective	open heart	90	<240 min	31	< 85min	< 90min	closed and < 90 min	19	<60 min
pre	107	female	2015-04-17	2015-04-17	9.5	>= 5kg	87	Large secundum ASD with inadequate rim for device closure	acyanosis	no	yes	Langer-Giedian syndrome	no	no	no	yes	no		no	yes	no	no		no		3	class 3-4	no	no	yes	lasix,aldactone	no		2018-08-04	ASD closure	3	other	< 6.2 score	elective	elective	open heart	95	<240 min	33	< 85min	< 90min	closed and < 90 min	15	<60 min
pre	125	male	2014-11-13	2018-04-08	11	>= 5kg	96	ASD	acyanosis	no	no		no	no	no	no	yes	Asthma	no	yes	no	no		no		2	class 1-2	no	no	yes	lasix,aldactone	no		2018-09-08	ASD closure	3	other	< 6.2 score	elective	elective	open heart	60	<240 min	27	< 85min	< 90min	closed and < 90 min	15	<60 min
pre	72	female	2018-05-05	2019-01-29	5.5	>= 5kg	999	Perimembranous VSD with severe MR	acyanosis	no	no		no	no	no	no	yes	FTT	no	yes	yes	no		yes	Stenotrophompnas septicemia	3	class 3-4	no	no	no		no		2019-03-22	VSD closure	6	other	< 6.2 score	elective	elective	open heart	187	<240 min	128	>=85 min	>=90 min	CBP time > 90 min	86	>=60min
post	30	male	2019-05-25	2019-11-20	4.4	< 5 kg	65	Large outlet VSD with moderate MR with mild hypoplastic aortic arch	acyanosis	no	no		no	no	no	no	no		no	yes	yes	no		yes	pneumonia	3	class 3-4	no	no	yes	lasix,aldactone,lanoxin	no		2019-11-26	VSD closure with MV annuplasty	6	other	< 6.2 score	elective	elective	open heart	155	<240 min	120	>=85 min	>=90 min	CBP time > 90 min	90	>=60min
post	168	male	2015-08-05	#NULL!	10.5	>= 5kg	88	Perimembranous VSD with moderate AR	acyanosis	no	no		no	no	no	no	no		no	no	no	no		no		2	class 1-2	no	no	no		no		2019-08-29	VSD closure wit AV repair	6	other	< 6.2 score	elective	elective	open heart	140	<240 min	101	>=85 min	>=90 min	CBP time > 90 min	81	>=60min
post	144	male	2017-09-19	#NULL!	12	>= 5kg	80	Large perimembranous VSD, subvalvular PS with aortic ridge	acyanosis	no	no		no	no	no	no	no		no	no	no	no		no		1	class 1-2	no	no	no		no		2019-07-26	Total repair	6	other	< 6.2 score	elective	elective	open heart	180	<240 min	111	>=85 min	>=90 min	CBP time > 90 min	87	>=60min
pre	52	male	2006-08-09	2014-10-01	28.3	>= 5kg	139	Small perimembranous VSD with dysplastic TV with severe TR	acyanosis	no	no		no	no	no	no	no		no	no	no	no		no		2	class 1-2	no	no	no		no		2018-12-14	TV repair with direct VSD closure	6	other	< 6.2 score	elective	elective	open heart	180	<240 min	98	>=85 min	>=90 min	CBP time > 90 min	67	>=60min
post	65	male	2008-08-17	2017-04-01	18.2	>= 5kg	999	Subaortic VSD with prolapsed RCC with mild AR with mild RVOT	acyanosis	no	no		no	no	no	no	yes	epilepsy, previous IE	no	no	no	no		no		2	class 1-2	no	no	no		no		2020-03-19	VSD closure	6	other	< 6.2 score	elective	elective	open heart	190	<240 min	90	>=85 min	>=90 min	CBP time > 90 min	72	>=60min
post	157	female	2011-09-09	#NULL!	15.5	>= 5kg	116	Perimembranous VSD with PHT wit cortriatriatum sinister	acyanosis	no	no		no	no	no	no	no		no	yes	yes	no		no		3	class 3-4	no	no	no		no		2019-08-23	VSD closure	6	other	< 6.2 score	elective	elective	open heart	180	<240 min	121	>=85 min	>=90 min	CBP time > 90 min	85	>=60min
post	85	male	2018-01-03	#NULL!	11	>= 5kg	92	Moderate perimembranous to outlet VSD with mild to moderate AR	acyanosis	no	no		no	no	no	no	no		no	yes	no	no		no		3	class 3-4	no	no	yes	lasix,aldactone,lanoxin	no		2020-02-04	VSD closure	6	other	< 6.2 score	elective	elective	open heart	155	<240 min	93	>=85 min	>=90 min	CBP time > 90 min	64	>=60min
post	195	female	2018-10-20	2019-04-01	7	>= 5kg	70	Large VSD with PHT	acyanosis	no	no		no	no	no	no	no		no	yes	yes	no		no		3	class 3-4	no	no	yes	lasix,aldactone	no		2019-11-09	VSD closure	6	other	< 6.2 score	elective	elective	open heart	165	<240 min	100	>=85 min	>=90 min	CBP time > 90 min	46	<60 min
post	89	female	2017-10-18	2017-10-18	9.3	>= 5kg	77.5	ASD secundum, perimembranous VSD, PAPVR	acyanosis	no	no		no	no	no	no	no		no	yes	no	no		no		3	class 3-4	no	no	no		no		2019-04-26	Total repair	6	other	< 6.2 score	elective	elective	open heart	215	<240 min	132	>=85 min	>=90 min	CBP time > 90 min	110	>=60min
post	240	male	2019-03-13	#NULL!	7.3	>= 5kg	73	Perimembranous VSD	acyanosis	no	yes	Holt-gram syndrome	no	no	no	yes	yes	Hearing impairment, congenital Rt ptosis	no	yes	no	no		no		2	class 1-2	no	no	yes	lasix	no		2020-02-11	VSD closure	6	other	< 6.2 score	elective	elective	open heart	180	<240 min	123	>=85 min	>=90 min	CBP time > 90 min	91	>=60min
pre	94	female	2017-12-15	2017-12-15	4.9	< 5 kg	65	large perimembranous VSD with tiny PDA	acyanosis	no	yes	Down syndrome	yes	no	no	no	yes	Hypothyroid,FTT	no	yes	no	no		no		3	class 3-4	no	no	yes	lasix,aldactone,captopril	no		2019-02-02	VSD closure with PDA ligation	6	other	< 6.2 score	elective	elective	open heart	170	<240 min	120	>=85 min	>=90 min	CBP time > 90 min	83	>=60min
pre	145	male	2016-10-12	2017-02-12	7.2	>= 5kg	78	Doubly committed VSD with flap PFO	cyanosis	no	no		no	no	no	no	yes	GDD, FTT	no	yes	yes	no		no		3	class 3-4	no	no	yes	lasix, aldactone, lanoxin	no		2018-10-27	VSD closure	6	other	< 6.2 score	elective	elective	open heart	130	<240 min	90	>=85 min	>=90 min	CBP time > 90 min	55	<60 min
pre	240	female	2016-01-30	2017-05-22	10.98	>= 5kg	84	Perimembranous-inlet VSD and muscular VSD Bilateral SVC, flow-related PHT	acyanosis	no	no		no	no	no	no	no		no	yes	yes	no		no		3	class 3-4	no	no	yes	Aldactone	no		2018-05-28	Transatrial VSDs closure with 2 pieces of glutaraldehyde treated autologous pericardial patch	6	other	< 6.2 score	elective	elective	open heart	170	<240 min	110	>=85 min	>=90 min	CBP time > 90 min	84	>=60min
pre	223	female	2013-06-18	#NULL!	13.2	>= 5kg	98	TOF with PS with PDA with small MAPCA	cyanosis	no	yes	DiGeorge syndrome	no	yes	no	no	yes	Laryngeal web	no	no	no	no		no		2	class 1-2	no	no	no		no		2018-04-09	Total repair (VSD Closure with dacron patch, infundibulectomy, transannular patch monocusp technique)	6	other	< 6.2 score	elective	elective	open heart	160	<240 min	92	>=85 min	>=90 min	CBP time > 90 min	70	>=60min
post	132	female	2018-10-03	2018-11-15	5.6	>= 5kg	69	Large outlet VSD with ASD with PDA	acyanosis	no	no		no	no	no	no	no		no	yes	no	no		no		3	class 3-4	no	no	no		no		2019-06-29	VSD closure with primary ASD closure with PDA ligation	6	other	< 6.2 score	elective	elective	open heart	125	<240 min	90	>=85 min	>=90 min	CBP time > 90 min	65	>=60min
post	238	male	2017-01-07	2017-11-01	10.3	>= 5kg	87.1	Small perimembranous VSD with partial closure by prolapse RCC, mild AR	acyanosis	no	no		no	no	no	no	no		no	no	no	no		no		1	class 1-2	no	no	no		no		2020-02-01	VSD closure with subaortic ridge resection	6	other	< 6.2 score	elective	elective	open heart	140	<240 min	92	>=85 min	>=90 min	CBP time > 90 min	69	>=60min
post	232	male	2018-05-04	#NULL!	9.3	>= 5kg	78	DORV with DCRV with severe subvalvular PS with perimembranous VSD	cyanosis	no	no		no	no	no	no	yes	G6PD deficiency	no	no	no	no		no		2	class 1-2	no	no	yes	propanolol	no		2020-01-21	VSD closure	6	other	< 6.2 score	elective	elective	open heart	175	<240 min	175	>=85 min	>=90 min	CBP time > 90 min	70	>=60min
pre	231	male	2017-11-30	2018-03-13	4.1	< 5 kg	63	Perimembranous extended to subaortic VSD (type I-II)	acyanosis	no	no		no	no	no	no	no		no	yes	no	no		yes	Pnenumonia	3	class 3-4	no	no	no		no		2018-04-28	VSD Closure with autologous pericardial patch	6	other	< 6.2 score	elective	elective	open heart	150	<240 min	100	>=85 min	>=90 min	CBP time > 90 min	73	>=60min
pre	279	male	2016-01-07	2016-01-07	11.6	>= 5kg	86	PA VSD	cyanosis	no	no		no	no	no	no	no		no	no	no	no		no		2	class 1-2	no	no	no		no		2018-06-22	VSD closure	6	other	< 6.2 score	elective	elective	open heart	190	<240 min	111	>=85 min	>=90 min	CBP time > 90 min	87	>=60min
pre	230	female	2008-02-28	2010-08-03	51.3	>= 5kg	141	Subaortic VSD with prolapse RCC	acyanosis	no	no		no	no	no	no	no		no	no	no	no		no		1	class 1-2	no	no	no		no		2018-04-28	VSD Closure with autologous pericardial patch	6	other	< 6.2 score	elective	elective	open heart	195	<240 min	100	>=85 min	>=90 min	CBP time > 90 min	72	>=60min
pre	237	male	2013-10-05	2018-03-27	15.3	>= 5kg	105	Perimembranous VSD with double chamber right ventricle	acyanosis	no	no		no	no	no	no	no		no	no	no	no		no		2	class 1-2	no	no	no		no		2018-05-17	VSD closure with autologous glutaraldehyde-treated pericardial patch.resection of muscle bundle	6	other	< 6.2 score	elective	elective	open heart	160	<240 min	90	>=85 min	>=90 min	CBP time > 90 min	69	>=60min
pre	103	male	2013-02-04	2013-02-04	20	>= 5kg	114	Small perimembranous VSD with small subaortic ridge	acyanosis	no	no		no	no	no	no	no		no	no	no	no		no		1	class 1-2	no	no	no		no		2018-07-31	VSD closure	6	other	< 6.2 score	elective	elective	open heart	150	<240 min	90	>=85 min	>=90 min	CBP time > 90 min	61	>=60min
pre	102	male	2012-05-30	2013-03-01	18.6	>= 5kg	113	Perimembranous VSD, subaortic ridge, mild LVOT obstruction with small ASD secundum	acyanosis	no	no		no	no	no	no	no		no	no	no	no		no		1	class 1-2	no	no	no		no		2018-07-31	VSD closure, subaortic ridge resection with myectomy	6	other	< 6.2 score	elective	elective	open heart	150	<240 min	100	>=85 min	>=90 min	CBP time > 90 min	79	>=60min
post	80	female	2015-04-20	2015-04-20	15	>= 5kg	99	Intermediate canal	acyanosis	no	yes	Down syndrome	yes	no	no	no	no		no	yes	no	no		no		3	class 3-4	no	no	yes	lasix,aldactone	no		2020-02-14	Total repaia	5	other	< 6.2 score	elective	elective	open heart	140	<240 min	90	>=85 min	>=90 min	CBP time > 90 min	59	<60 min
pre	14	male	2017-11-19	2017-11-30	6.7	>= 5kg	68	Intermediate AVSD with mild LAVVR	acyanosis	no	no		no	no	no	no	no		no	no	no	no		no		2	class 1-2	no	no	no		no		2018-09-28	Total repair	5	other	< 6.2 score	elective	elective	open heart	195	<240 min	107	>=85 min	>=90 min	CBP time > 90 min	81	>=60min
pre	93	male	2014-10-03	2015-02-19	12	>= 5kg	93	Partial AVSD	acyanosis	no	no		no	no	no	no	no		no	yes	no	no		no		2	class 1-2	no	no	yes	lasix,aldactone,lanoxin	no		2019-02-05	Total repair	4	other	< 6.2 score	elective	elective	open heart	210	<240 min	145	>=85 min	>=90 min	CBP time > 90 min	125	>=60min
pre	126	female	2012-02-06	2016-02-06	16.5	>= 5kg	117	Partial AVSD, anterior LAVV(MV) cleft with moderate MR	acyanosis	no	no		no	no	no	no	no		no	yes	no	no		no		2	class 1-2	no	no	yes	lasix,aldactone	no		2018-09-11	Total repair [ASD primum closure with gluteraldehyde-treated autologus pericardial patch, LAVV(MV) cleft repair]	4	other	< 6.2 score	elective	elective	open heart	160	<240 min	90	>=85 min	>=90 min	CBP time > 90 min	62	>=60min
post	74	female	2019-02-27	2019-03-01	8	>= 5kg	66	Lt isomerism, CACV, severe PS	cyanosis	yes	no		no	no	no	no	no		yes	no	no	yes	LMBTS 11.03.2019	no		2	class 1-2	no	no	yes	lanoxin	no		2020-03-06	Kawashima	3.1	other	< 6.2 score	elective	elective	open heart	180	<240 min	109	>=85 min	>=90 min	CBP time > 90 min	#NULL!	#NULL!
pre	254	female	2016-05-02	2017-12-15	9.1	>= 5kg	79	Large ASD secundum with right proximal pulmonary artery stenosis	acyanosis	no	yes	Noonan syndrome	no	no	no	yes	no		no	no	yes	no		no		3	class 3-4	no	no	no		no		2018-06-26	ASD closure (pericardial patch) with proximal RPA plasty (treated autologus pericardial patch augmentation)	3	other	< 6.2 score	elective	elective	open heart	145	<240 min	93	>=85 min	>=90 min	CBP time > 90 min	61	>=60min
pre	268	male	2015-09-15	2015-11-01	11	>= 5kg	86	Large subaotic VSD,PDA s/p PDA device closure with pulmonary HT	acyanosis	no	no		no	no	no	no	no		no	yes	yes	no		no		3	class 3-4	no	no	yes	Sidenafil	no		2018-05-01	VSD closure	6	other	< 6.2 score	elective	elective	open heart	256	>=240 min	141	>=85 min	>=90 min	CBP time > 90 min	95	>=60min
pre	115	male	2016-02-29	2016-02-29	10.5	>= 5kg	84	Large VSD mild subclavian PS, small PDA	acyanosis	no	no		no	no	no	no	no		no	yes	no	no		no		3	class 3-4	no	no	no		no		2018-08-20	VSD closure with PDA ligation	6	other	< 6.2 score	elective	elective	open heart	325	>=240 min	206	>=85 min	>=90 min	CBP time > 90 min	182	>=60min
post	27	male	2016-07-05	2017-01-05	12.7	>= 5kg	95	VSD with subvalvular and valvular PS	acyanosis	no	no		no	no	no	no	yes	multiple anomaly, GDD	no	no	no	no		no		2	class 1-2	no	no	yes	lasix,aldactone	no		2019-10-11	VSD closure with trans RV infundibulectomy with PA augmentation	6	other	< 6.2 score	elective	elective	open heart	300	>=240 min	116	>=85 min	>=90 min	CBP time > 90 min	90	>=60min
pre	187	female	2012-12-21	#NULL!	15.5	>= 5kg	111	UVH, dextrocardia, interuptted IVC, PS s/p Kawashima 03.03.2014	cyanosis	yes	no		no	no	no	no	no		yes	no	no	no		no		2	class 1-2	no	no	yes	ASA, enaril, amoxy	no		2019-01-28	Redirect hepatic vein to pulmonary artery	3	other	< 6.2 score	elective	elective	open heart	270	>=240 min	104	>=85 min	>=90 min	CBP time > 90 min	#NULL!	#NULL!
pre	195	female	2018-03-18	2018-09-18	7.9	>= 5kg	69	CoA, PDA	acyanosis	no	no		no	no	no	no	no		no	yes	no	no		no		2	class 1-2	no	no	yes	lanoxin, HCTZ	no		2019-02-15	Coarctation repair (coarctectomy and end-to-end anastomosis) and PDA devision	6	other	< 6.2 score	elective	elective	closed heart	110	<240 min	#NULL!	#NULL!	no	closed and < 90 min	17	<60 min
pre	20	female	2018-05-17	2018-07-25	5.9	>= 5kg	62	Large PDA	acyanosis	no	no		no	no	no	no	no		no	yes	no	no		no		2	class 1-2	no	no	no		no		2018-10-04	PDA ligation	3	other	< 6.2 score	elective	elective	open heart	75	<240 min	#NULL!	#NULL!	no	closed and < 90 min	#NULL!	#NULL!
pre	28	male	2018-07-03	2018-09-10	4.7	< 5 kg	60	CoA, parachute MV, mild MS	acyanosis	no	no		no	no	no	no	yes	G6PD deficiency	no	yes	no	no		yes	RSV pneumonia	2	class 1-2	no	no	no		no		2018-10-22	Coarctectomy	6	other	< 6.2 score	elective	elective	open heart	120	<240 min	#NULL!	#NULL!	no	closed and < 90 min	20	<60 min
pre	97	female	2018-12-19	#NULL!	3.4	< 5 kg	52	CoA, multiple VSD, ASD, PDA	acyanosis	no	no		no	no	no	no	no		no	yes	no	no		yes	pneumonia	3	class 3-4	no	no	yes	lasix,aldactone,captopril	no		2019-01-31	Coarctectomy with PA banding with PDA ligation	6	other	< 6.2 score	elective	elective	open heart	93	<240 min	#NULL!	#NULL!	no	closed and < 90 min	15	<60 min
pre	80	male	2013-09-14	2013-12-01	15.2	>= 5kg	110	Juxtaductal CoA, PDA	acyanosis	no	no		no	no	no	no	no		no	no	no	no		no		1	class 1-2	no	no	no		no		2019-03-29	Coarctectomy, PDA ligation	6	other	< 6.2 score	elective	elective	open heart	115	<240 min	#NULL!	#NULL!	no	closed and < 90 min	22	<60 min
pre	194	male	2011-04-08	2018-08-10	20	>= 5kg	110	CoA	acyanosis	no	no		no	no	no	no	yes	CKD stage III, MCKD	no	no	no	no		no		2	class 1-2	no	no	yes	enaril, propanolol	no		2019-02-11	Coarctation repair (coarctectomy and extended end-to-end anastomosis) and PDA devision	6	other	< 6.2 score	elective	elective	closed heart	140	<240 min	#NULL!	#NULL!	no	closed and < 90 min	11	<60 min
post	50	male	2017-07-01	2018-03-01	10	>= 5kg	84	TOF	cyanosis	no	yes	DiGeorge syndrome	no	yes	no	no	no		no	no	no	no		no		3	class 3-4	no	no	no		no		2020-02-20	Total repair	8	other	>= 6.2 score	elective	elective	open heart	180	<240 min	121	>=85 min	>=90 min	CBP time > 90 min	83	>=60min
pre	165	female	2018-06-29	2018-09-01	5.5	>= 5kg	62	Pink TOF	acyanosis	no	no		no	no	no	no	no		no	yes	no	no		no		2	class 1-2	no	no	yes	lasix, aldactone, lanoxin	no		2019-01-17	Total repair (subannular repair	8	other	>= 6.2 score	elective	elective	open heart	110	<240 min	50	< 85min	< 90min	closed and < 90 min	46	<60 min
post	88	male	2018-10-19	2019-02-08	5.5	>= 5kg	67	DORV with subaortic VSD, dextrocardia, bilateral SVC	cyanosis	no	no		no	no	no	no	no		no	yes	no	no		no		2	class 1-2	no	no	no		no		2019-04-26	VSD closure	7	other	>= 6.2 score	elective	elective	open heart	150	<240 min	82	< 85min	< 90min	closed and < 90 min	42	<60 min
pre	76	male	2018-10-01	#NULL!	7	>= 5kg	999	Right isomerism, common atrium common ventricle with PS	cyanosis	yes	no		no	no	no	no	no		yes	no	no	no		no		4	class 3-4	no	no	no		no		2019-03-16	LMBTS	6.3	6.3 score	>= 6.2 score	emergency	emergency or urgency	open heart	120	<240 min	23	< 85min	< 90min	closed and < 90 min	#NULL!	#NULL!
post	147	male	2019-05-04	2019-05-05	5.6	>= 5kg	56	Intracardiac type TAPVR drains to coronary sinus with PFO	cyanosis	no	no		no	no	no	no	no		no	no	no	no		no		2	class 1-2	no	no	no		no		2019-08-02	Unroof coronary sinus with TAPVR repair with PFO closure	9	other	>= 6.2 score	elective	elective	open heart	210	<240 min	87	>=85 min	< 90min	closed and < 90 min	66	>=60min
post	177	male	2013-03-21	#NULL!	13.9	>= 5kg	105	UVH with double inlet LV, mild PS, twin AV node s/p PA banding, BDG	cyanosis	yes	no		no	no	no	no	no		no	yes	yes	yes	PA banding 31.05.2013, BDG 04.02.2014	no		2	class 1-2	no	no	yes	lasix,aldactone,sidenafil	no		2019-09-27	Extracardiac fontan	9	other	>= 6.2 score	elective	elective	open heart	130	<240 min	73	< 85min	< 90min	closed and < 90 min	#NULL!	#NULL!
pre	4	female	2015-08-28	2018-06-03	9	>= 5kg	88	TAPVR coronary sinus type with secundum ASD	cyanosis	no	no		no	no	no	no	no		no	yes	no	no		no		3	class 3-4	no	no	no		no		2018-09-07	Total repair	9	other	>= 6.2 score	elective	elective	open heart	145	<240 min	41	< 85min	< 90min	closed and < 90 min	23	<60 min
pre	70	male	2010-02-23	#NULL!	25.2	>= 5kg	129	ccTGA,Dextrocardia, Remote VSD, ASD, PS	cyanosis	no	no		no	no	no	no	no		no	no	no	no		no		2	class 1-2	no	no	yes	Captopril	no		2019-03-01	ASD VSD closure	9	other	>= 6.2 score	elective	elective	open heart	135	<240 min	73	< 85min	< 90min	closed and < 90 min	53	<60 min
pre	202	female	2012-02-28	2013-02-28	18	>= 5kg	117	Tricuspid atresia, nonrestrictive ASD,VSD,PS s/p BDG	cyanosis	yes	no		no	no	no	no	no		no	no	no	no	BDG	no		2	class 1-2	no	no	yes	ASA	no		2019-02-22	Completion of extracardiac Fontan procedure	9	other	>= 6.2 score	elective	elective	open heart	180	<240 min	80	< 85min	< 90min	closed and < 90 min	#NULL!	#NULL!
pre	191	male	2006-08-09	2007-07-29	27	>= 5kg	135	Tricuspid atesia, PS s/p RMBTS s/p BDG 23.11.2011	cyanosis	yes	no		no	no	no	no	yes	CLCP post repair siince 8 months old	no	no	no	no		no		2	class 1-2	no	no	yes	ASA	no		2019-02-08	Completion of extracardiac Fontan procedure	9	other	>= 6.2 score	elective	elective	open heart	130	<240 min	70	< 85min	< 90min	closed and < 90 min	#NULL!	#NULL!
post	98	female	2009-12-03	2009-12-06	25	>= 5kg	128	UVH, PA with large VSD with multiple MAPCAs	cyanosis	yes	no		no	no	no	no	no		no	no	no	yes	RMBTS 11.01.2010, BDG 04.06.2011	no		2	class 1-2	no	no	no		no		2019-05-10	Extracardiac fontan	9	other	>= 6.2 score	elective	elective	open heart	120	<240 min	83	< 85min	< 90min	closed and < 90 min	#NULL!	#NULL!
post	197	male	2018-04-29	2018-04-29	8.2	>= 5kg	73	TOF	cyanosis	no	no		no	no	no	no	no		no	no	no	no		no		3	class 3-4	no	no	yes	propanolol	no		2019-11-15	Total repair	8	other	>= 6.2 score	elective	elective	open heart	150	<240 min	87	>=85 min	< 90min	closed and < 90 min	67	>=60min
pre	131	female	2013-04-08	2013-04-08	13.2	>= 5kg	100.5	CoA, hypoplasia arch	acyanosis	no	yes	Turner syndrome	no	no	no	yes	no		no	yes	no	no		no		2	class 1-2	no	no	yes	propanolol	no		2018-09-21	Sliding plasty CoA repair + arch reconstruction	8	other	>= 6.2 score	elective	elective	open heart	160	<240 min	56	< 85min	< 90min	closed and < 90 min	50	<60 min
post	249	female	2008-06-24	#NULL!	27.3	>= 5kg	143.5	Severe PR s/p total repair for TOF	acyanosis	no	no		no	no	no	no	no		no	no	no	yes	Total repair 14.01.2011	no		1	class 1-2	no	no	no		no		2020-02-28	Redo PVR	8	other	>= 6.2 score	elective	elective	open heart	80	<240 min	43	< 85min	< 90min	closed and < 90 min	#NULL!	#NULL!
pre	206	female	2014-07-05	2014-08-05	12	>= 5kg	102	TOF	cyanosis	no	no		no	no	no	no	no		no	no	no	no		no		2	class 1-2	no	no	yes	propanolol	no		2019-02-27	"TOF repair(1.VSD Dacron patch closure 2.Infundibulectomy and transannular patch with monocusp autologous	8	other	>= 6.2 score	elective	elective	open heart	140	<240 min	86	>=85 min	< 90min	closed and < 90 min	71	>=60min
pre	143	male	2002-05-19	2003-05-05	37	>= 5kg	159	Post ASD closure with abnormal IVC drainage to LA with residual ASD	acyanosis	no	no		no	no	no	no	no		no	yes	no	no		no		2	class 1-2	no	no	yes	lasix, aldactone	no		2018-10-19	redo ASD closure with re-rounting IVC to RA using bovine pericardial patch	8	other	>= 6.2 score	elective	elective	open heart	200	<240 min	86	>=85 min	< 90min	closed and < 90 min	56	<60 min
pre	216	male	2002-09-06	#NULL!	54	>= 5kg	165	TOF S/P total repair, severe PR, severe dilation of RV with preseved RV systolic function	cyanosis	no	no		no	no	no	no	no		no	yes	no	yes	TOF repair 17.11.2015	no		2	class 1-2	no	no	yes	lasix, aldactone	no		2019-03-28	Redo PVR RV-PA connection with 24 mm Goretex-valve conduit	8	other	>= 6.2 score	elective	elective	open heart	215	<240 min	84	< 85min	< 90min	closed and < 90 min	55	<60 min
post	129	female	2017-08-09	#NULL!	12.5	>= 5kg	999	pink TOF with flap PFO	acyanosis	no	no		no	no	no	no	no		no	no	no	no		no		2	class 1-2	no	no	no		no		2019-07-05	Total repair	8	other	>= 6.2 score	elective	elective	open heart	145	<240 min	78	< 85min	< 90min	closed and < 90 min	52	<60 min
pre	123	female	2012-02-17	#NULL!	14	>= 5kg	114	Supramitral ring	acyanosis	no	no		no	no	no	no	yes	Asthma	no	yes	yes	no		yes	RSV pneumonia 2 months ago (26.07.2019)	2	class 1-2	no	no	yes	lasix, aldactone, avamis, seretide, montelukast, cetirizine	no		2018-09-07	Supramitral ring resection	8	other	>= 6.2 score	urgency	emergency or urgency	open heart	175	<240 min	89	>=85 min	< 90min	closed and < 90 min	57	<60 min
pre	241	male	2015-06-19	2016-10-14	11.7	>= 5kg	91	TOF with severe subvalvulae PS	cyanosis	no	no		no	no	no	no	no		no	no	no	no		no		2	class 1-2	no	no	yes	Propanolol	no		2018-06-01	Total repair (VSD closure with gluteraldehyde treat pericardial patch, infundibulectomy, MPA augmentation with gluteraldehyde treat pericardial patch )	8	other	>= 6.2 score	elective	elective	open heart	160	<240 min	77	< 85min	< 90min	closed and < 90 min	59	<60 min
post	109	male	2017-09-07	2017-09-07	9.7	>= 5kg	82	CACV with PS	cyanosis	yes	no		no	no	no	no	no		yes	no	no	yes	RMBTS	no		2	class 1-2	no	no	no		no		2019-05-24	bilateral BDG	7.5	other	>= 6.2 score	elective	elective	open heart	160	<240 min	86	>=85 min	< 90min	closed and < 90 min	#NULL!	#NULL!
post	185	female	2006-01-27	#NULL!	37.2	>= 5kg	148	Anomalous origin of LM from right coronary sinus (intramuscular cause)	acyanosis	no	no		no	no	no	no	no		no	no	no	no		no		2	class 1-2	no	no	yes	metoprolol	no		2019-10-18	Unroofing LM origin	7.5	other	>= 6.2 score	elective	elective	open heart	155	<240 min	58	< 85min	< 90min	closed and < 90 min	52	<60 min
pre	207	female	2017-09-17	#NULL!	8	>= 5kg	75	Common atrium, common ventricle,, supracardiac TAPVR, PA, confluent PA, PDA S/P repair of TAPVR and RMBTs, PDA ligation	cyanosis	yes	no		no	no	no	no	no		no	no	no	yes	RMBTS , repair TAPVR 28.09.2017	no		2	class 1-2	no	no	yes	ASA, amoxycillin	no		2019-03-08	BDG	7.5	other	>= 6.2 score	elective	elective	open heart	160	<240 min	87	>=85 min	< 90min	closed and < 90 min	#NULL!	#NULL!
pre	172	female	2017-11-19	2017-11-19	8.8	>= 5kg	70	Tricuspid atresia, PS	cyanosis	yes	no		no	no	no	no	no		no	no	no	no		no		2	class 1-2	no	no	no		no		2019-01-08	BDG, PAB	7.5	other	>= 6.2 score	elective	elective	open heart	160	<240 min	62	< 85min	< 90min	closed and < 90 min	#NULL!	#NULL!
pre	160	male	2013-05-24	2018-05-24	15	>= 5kg	102	Common atrium, common ventricle, PA, L-TGA s/p RMMBTS 18.06.2013	cyanosis	yes	no		no	no	no	no	no		no	no	no	yes	RMBTS 18.06.2013	no		2	class 1-2	no	no	yes	ASA	no		2018-11-30	Bilateral BDG	7.5	other	>= 6.2 score	elective	elective	open heart	225	<240 min	75	< 85min	< 90min	closed and < 90 min	46	<60 min
post	236	female	2019-05-07	2019-05-08	5.5	>= 5kg	999	DORV, doubly commited VSD	cyanosis	no	yes	Down syndrome	yes	no	no	no	no		no	yes	no	no		no		2	class 1-2	no	no	yes	lasix,aldactone	no		2020-01-31	Total repair	7	other	>= 6.2 score	elective	elective	open heart	150	<240 min	89	>=85 min	< 90min	closed and < 90 min	53	<60 min
post	107	male	2018-06-11	2018-06-13	6.4	>= 5kg	73	TA,ASD,tripatite RV, restrictive VSD	cyanosis	yes	no		no	no	no	no	no		no	no	no	no		no		3	class 3-4	no	no	no		no		2019-05-21	BDG	7	other	>= 6.2 score	elective	elective	open heart	175	<240 min	87	>=85 min	< 90min	closed and < 90 min	10	<60 min
pre	246	male	2014-04-20	2014-04-28	13.2	>= 5kg	98	Hypoplastic tripartite RV with ASD post RMBTS	acyanosis	no	no		no	no	no	no	no		no	no	no	yes	RMBTS 28.04.2014	no		2	class 1-2	no	no	no		no		2018-06-07	One and a half ventricular repair comprising bidirectional Glenn shunt and ASD cloure RMBTs ligation	7	other	>= 6.2 score	elective	elective	open heart	190	<240 min	77	< 85min	< 90min	closed and < 90 min	6	<60 min
post	161	male	2017-12-22	#NULL!	8.5	>= 5kg	76	TA/VSD s/p PA banding	cyanosis	no	no		no	no	no	no	no		no	yes	no	yes	PA banding 20.02.2018	no		3	class 3-4	no	no	no		no		2019-08-27	Bidirectional Glenn with azygous vein ligation with MPA ligation	7	other	>= 6.2 score	elective	elective	open heart	150	<240 min	59	< 85min	< 90min	closed and < 90 min	#NULL!	#NULL!
pre	32	male	2017-04-24	#NULL!	8	>= 5kg	73	Common atrium common ventricle, severe PS	cyanosis	yes	no		no	no	no	no	no		yes	no	no	no		no		2	class 1-2	no	no	no		no		2018-10-26	Right BDG with MPA ligation	7	other	>= 6.2 score	elective	elective	open heart	155	<240 min	58	< 85min	< 90min	closed and < 90 min	#NULL!	#NULL!
pre	25	female	2018-05-29	2018-06-13	4.2	< 5 kg	59	DORV subaortic VSD with mild subvalvular PS	cyanosis	no	no		no	no	no	no	no		no	yes	no	no		no		2	class 1-2	no	no	no		no		2018-10-19	Total repair	7	other	>= 6.2 score	elective	elective	open heart	105	<240 min	58	< 85min	< 90min	closed and < 90 min	43	<60 min
pre	245	male	2013-11-03	2015-12-17	12.6	>= 5kg	101	UVH with severe PS with TAPVR mix type	cyanosis	yes	no		no	no	no	no	no		no	no	no	no		no		2	class 1-2	no	no	no		no		2018-06-05	Bidirectional Glenn procedure with ligation of vertical vein and MPA	7	other	>= 6.2 score	elective	elective	open heart	180	<240 min	57	< 85min	< 90min	closed and < 90 min	#NULL!	#NULL!
post	59	male	2018-06-04	2018-08-02	8.7	>= 5kg	80	CACV, single left SVC	cyanosis	yes	no		no	no	no	no	no		yes	no	no	no		no		2	class 1-2	no	no	no		no		2019-04-02	Kawashima, MPA ligation	7	other	>= 6.2 score	elective	elective	open heart	155	<240 min	75	< 85min	< 90min	closed and < 90 min	#NULL!	#NULL!
post	172	female	2018-02-22	#NULL!	6.8	>= 5kg	72	PA.IVS unipartite RV small PFO with persistent left SVC s/p RMBTS	cyanosis	no	no		no	no	no	no	yes	GDD, microcephaly	no	no	no	yes	RMBTS 26.02.2018	no		3	class 3-4	no	no	no		no		2019-09-13	BDG wiith RMBTS division, atrial septectomy	7	other	>= 6.2 score	elective	elective	open heart	155	<240 min	79	< 85min	< 90min	closed and < 90 min	7	<60 min
pre	251	male	2016-04-08	2016-05-10	10.6	>= 5kg	84	Tricuspid atresia,TAPVR infracardiac type,moderate MR	cyanosis	no	no		no	no	no	no	no		no	yes	no	yes	Total TAPVR repair, PA banding 05.07.2016	no		2	class 1-2	no	no	no		no		2018-06-19	Bidirectional Glenn procedure and tightening PA band	7	other	>= 6.2 score	elective	elective	open heart	225	<240 min	81	< 85min	< 90min	closed and < 90 min	#NULL!	#NULL!
pre	122	male	2009-12-12	2010-05-12	25	>= 5kg	134.5	VSD, PS	acyanosis	no	no		no	no	no	no	yes	Asthma	no	no	no	no		no		2	class 1-2	no	no	yes	budesonide	no		2018-09-03	Total repair (Directed VSD closure and infundibulectomy)	7	other	>= 6.2 score	elective	elective	open heart	160	<240 min	80	< 85min	< 90min	closed and < 90 min	29	<60 min
post	131	male	2005-04-16	#NULL!	76	>= 5kg	163.5	DCRV	cyanosis	no	no		no	no	no	no	no		no	no	no	no		no		1	class 1-2	no	no	no		no		2019-06-29	DCRV muscle resection	7	other	>= 6.2 score	elective	elective	open heart	75	<240 min	37	< 85min	< 90min	closed and < 90 min	21	<60 min
pre	196	female	2008-03-23	#NULL!	30	>= 5kg	145	CCTGA with ASD and unobstructive Cor triatriatum	cyanosis	no	no		no	no	no	no	no		no	yes	no	no		no		2	class 1-2	no	no	no		no		2019-02-15	ASD closure using gluteraldehyde-treated autologous pericardial patch, excision of cortriatriatum membrane	6.8	other	>= 6.2 score	elective	elective	open heart	100	<240 min	41	< 85min	< 90min	closed and < 90 min	22	<60 min
pre	139	male	2017-09-22	2017-12-22	9.2	>= 5kg	75	SV ASD, cortriatriatum	acyanosis	no	no		no	no	no	no	no		no	no	yes	no		no		2	class 1-2	no	no	yes	lanoxin	no		2018-10-05	ASD closure, cortritritum membrane resection	6.8	other	>= 6.2 score	elective	elective	open heart	170	<240 min	87	>=85 min	< 90min	closed and < 90 min	63	>=60min
pre	250	male	2017-09-17	#NULL!	7.5	>= 5kg	73	Perimembranous extent to inlet VSD with subvalvular PS, PFO	acyanosis	no	no		no	no	no	no	no		no	yes	no	no		no		2	class 1-2	no	no	no		no		2018-06-16	VSD closure with glutaraldehyde treated autologous pericardial patch, infundibulectomy and direct PFO closure	6.5	other	>= 6.2 score	elective	elective	open heart	130	<240 min	73	< 85min	< 90min	closed and < 90 min	45	<60 min
post	169	male	2016-08-10	#NULL!	13	>= 5kg	89	PA/IVS restrictive ASD unipartite with non-confluent PA, absent RPA	cyanosis	no	no		no	no	no	no	no		no	no	no	no		yes	Gram negative rod septicemia	2	class 1-2	no	no	no		no		2019-09-08	Atrail septectomy wit RMBTS	6.3	6.3 score	>= 6.2 score	elective	elective	open heart	130	<240 min	69	< 85min	< 90min	closed and < 90 min	8	<60 min
post	231	male	2011-03-28	#NULL!	26	>= 5kg	131.8	Complete AVSD s/p total repair, progressive LVOTO due to subaortic ridge	acyanosis	no	no		no	no	no	no	no		no	yes	no	yes	Total repair 20.20.2012	no		2	class 1-2	no	no	yes	lasix,aldactone,atenolol	no		2020-01-21	Subaortic ridge resection with myectomy	6.3	6.3 score	>= 6.2 score	elective	elective	open heart	175	<240 min	62	< 85min	< 90min	closed and < 90 min	32	<60 min
post	76	female	2011-08-19	#NULL!	22	>= 5kg	126	subaortic ridge with mild AS, mild AR	acyanosis	no	no		no	no	no	no	no		no	no	no	no		no		1	class 1-2	no	no	no		no		2020-03-03	subaortic ridge resection	6.3	6.3 score	>= 6.2 score	elective	elective	open heart	80	<240 min	34	< 85min	< 90min	closed and < 90 min	18	<60 min
post	93	male	2009-07-18	2013-08-01	24	>= 5kg	128	Severe subvalvular PS due to subaortic ridge and HOCM	acyanosis	no	no		no	no	no	no	no		no	no	no	no		no		1	class 1-2	no	no	yes	atenolo	no		2019-05-03	Septal myectomy	6.3	6.3 score	>= 6.2 score	elective	elective	open heart	125	<240 min	50	< 85min	< 90min	closed and < 90 min	29	<60 min
pre	91	male	2012-09-20	2012-09-21	18.5	>= 5kg	115	CACV with PA	cyanosis	yes	no		no	no	no	no	no		no	no	no	yes	RMBTS 02.10.2012, BDG28.08.2013	no		1	class 1-2	no	no	no		no		2019-02-14	extracrdiac fontan	9	other	>= 6.2 score	elective	elective	open heart	270	>=240 min	88	>=85 min	< 90min	closed and < 90 min	#NULL!	#NULL!
post	70	female	2012-05-06	2013-05-17	16.6	>= 5kg	114	Partial AVSD, residual VSD, severe MR	acyanosis	no	no		no	no	no	no	no		no	no	no	yes	Total repair 22.11.2013	no		1	class 1-2	no	no	yes	lasix,aldactone.lanoxin	no		2020-03-18	Redo-MRV with pericardial tissue valve	7.5	other	>= 6.2 score	elective	elective	open heart	260	>=240 min	87	>=85 min	< 90min	closed and < 90 min	55	<60 min
post	204	female	2009-07-17	2009-07-17	18.5	>= 5kg	122	PA/IVS bipartite RV with severe TS s/p bilateral MBTS and central shunt s/p BDG with PA plasty	cyanosis	no	no		no	no	no	no	no		no	no	no	yes	RMBTS 22.07.2009, LMBTS 20.08.2009, central shunt 10.09.2010, BDG with PA plasty 19.10.1012	no		2	class 1-2	no	no	no		no		2019-11-22	Extracardiac fontan	9	other	>= 6.2 score	elective	elective	open heart	175	<240 min	108	>=85 min	>=90 min	CBP time > 90 min	#NULL!	#NULL!
pre	22	female	2018-05-30	2018-05-30	4.3	< 5 kg	55	Complete AVSD	acyanosis	no	yes	Down syndrome	yes	no	no	no	yes	FTT,GDD,Hypothyroid	no	yes	no	no		no		3	class 3-4	no	no	no		no		2018-10-12	AVSD repair	9	other	>= 6.2 score	elective	elective	open heart	190	<240 min	116	>=85 min	>=90 min	CBP time > 90 min	81	>=60min
post	62	male	2010-01-09	2010-06-17	21	>= 5kg	129	Dextrocardia, CACV, unbalance AVSD, PA	cyanosis	yes	no		no	no	no	no	no		yes	no	no	yes	BDG with PA plasty03.11.2013, RMBTS	no		2	class 1-2	no	no	no		no		2019-04-19	Extracardiac fontan	9	other	>= 6.2 score	elective	elective	closed heart	150	<240 min	92	>=85 min	>=90 min	CBP time > 90 min	#NULL!	#NULL!
pre	141	male	2014-10-30	2015-06-30	16	>= 5kg	103	Pentalogy of Fallot	cyanosis	no	no		no	no	no	no	no		no	no	no	no		no		2	class 1-2	no	no	yes	propanolol, FeSo4	no		2018-10-16	TOF repair subannular patching	8	other	>= 6.2 score	elective	elective	open heart	220	<240 min	136	>=85 min	>=90 min	CBP time > 90 min	94	>=60min
pre	262	male	2016-05-31	2016-05-31	10.2	>= 5kg	88	TOF with subvalvular PS	cyanosis	no	no		no	no	no	no	no		no	no	no	no		no		2	class 1-2	no	no	yes	Propanolol	no		2018-07-13	Total repair	8	other	>= 6.2 score	elective	elective	open heart	175	<240 min	90	>=85 min	>=90 min	CBP time > 90 min	64	>=60min
pre	142	male	2015-09-19	2015-09-19	11	>= 5kg	84	TOF	cyanosis	no	no		no	no	no	no	no		no	no	no	no		no		2	class 1-2	no	no	yes	propanolol	no		2018-10-18	TOF repair transannular patching	8	other	>= 6.2 score	elective	elective	open heart	195	<240 min	118	>=85 min	>=90 min	CBP time > 90 min	89	>=60min
post	103	female	2010-03-02	2010-03-02	17	>= 5kg	20	PA/VSD, severe hypoplastic confluent native PA, MAPCAs	cyanosis	no	no		no	no	no	no	no		no	yes	no	yes	Lt unifocalization	no		3	class 3-4	no	no	yes	lanoxin	no		2019-05-10	Total repair	11	other	>= 6.2 score	elective	elective	open heart	215	<240 min	90	>=85 min	>=90 min	CBP time > 90 min	161	>=60min
post	194	female	2008-10-28	#NULL!	25	>= 5kg	134	PA/VSD with confluent PA with MAPCAs s/p Lt unifocalization	cyanosis	no	no		no	no	no	no	no		no	no	no	yes	Lt unifocalization 18.04.2011	no		2	class 1-2	no	no	no		no		2019-11-08	Total repair	11	other	>= 6.2 score	elective	elective	open heart	235	<240 min	171	>=85 min	>=90 min	CBP time > 90 min	78	>=60min
post	181	female	2010-01-26	2010-06-01	16.6	>= 5kg	118.5	dTGA subpulmonic VSD with severe PS	cyanosis	no	no		no	no	no	no	no		no	no	no	yes	RMBTS 03.06.2011	no		3	class 3-4	no	no	yes	propanolol	no		2019-10-04	Total repair Rastelli	10	other	>= 6.2 score	elective	elective	open heart	170	<240 min	110	>=85 min	>=90 min	CBP time > 90 min	80	>=60min
pre	7	female	2010-03-28	2010-03-28	13	>= 5kg	110	Complete AVSD, Rastelli type B, PDA	acyanosis	no	no		no	no	no	no	no		no	yes	no	yes	PDA device closure 18.06.2018	no		2	class 1-2	no	no	no		no		2018-09-14	Total repair	9	other	>= 6.2 score	elective	elective	open heart	200	<240 min	113	>=85 min	>=90 min	CBP time > 90 min	90	>=60min
pre	271	male	2016-08-18	2016-08-18	7.2	>= 5kg	75	Complete AV canal type C	acyanosis	no	yes	Down syndrome	yes	no	no	no	no		no	yes	yes	no		no		3	class 3-4	no	no	yes	Sidenafil	no		2018-05-18	Total repair	9	other	>= 6.2 score	elective	elective	open heart	180	<240 min	109	>=85 min	>=90 min	CBP time > 90 min	91	>=60min
post	67	female	2006-12-19	#NULL!	28	>= 5kg	135	PA/IVS, small RV wiyh coronary sinusoid	cyanosis	no	no		no	no	no	no	no		no	no	yes	yes	RMBTS 19.12.2550, BDG with PA plasty 01.08.2551	no		2	class 1-2	no	no	yes	carvedilol	no		2019-04-23	Extracardiac fontan	9	other	>= 6.2 score	elective	elective	open heart	180	<240 min	118	>=85 min	>=90 min	CBP time > 90 min	#NULL!	#NULL!
post	173	male	2007-09-06	2007-09-06	25	>= 5kg	135	DORV with UVH with severe PS with TAPVR s/p BDG with repaired TAPVR	cyanosis	yes	no		no	no	no	no	no		yes	no	no	yes	BDG with repaired TAPVR 13.01.2011	no		1	class 1-2	no	no	no		no		2019-09-13	Extracardiac fontan	9	other	>= 6.2 score	elective	elective	open heart	165	<240 min	138	>=85 min	>=90 min	CBP time > 90 min	#NULL!	#NULL!
pre	92	female	2018-08-28	2018-09-05	4	< 5 kg	52	complete AVSD type C with PDA	acyanosis	no	yes	Down syndrome	yes	no	no	no	no		no	yes	no	no		no		2	class 1-2	no	no	yes	lasix,aldactone	no		2019-02-08	AVSD repair with PDA ligation	9	other	>= 6.2 score	elective	elective	open heart	210	<240 min	128	>=85 min	>=90 min	CBP time > 90 min	91	>=60min
post	166	female	2009-06-25	#NULL!	31	>= 5kg	133	UVH with unrestricted ASD with cotritriatum membrane obstruction s/p BDG	cyanosis	yes	no		no	no	no	no	no		yes	yes	no	yes	BDG 23.12.2011	no		2	class 1-2	no	no	yes	lasix	no		2019-09-06	Extracardiac fontan	9	other	>= 6.2 score	elective	elective	open heart	165	<240 min	102	>=85 min	>=90 min	CBP time > 90 min	22	<60 min
pre	63	male	2018-07-25	2018-07-25	5.2	>= 5kg	64	Complete AVSD, Rastelli type A	acyanosis	no	no		no	no	no	no	no		no	yes	no	no		no		2	class 1-2	no	no	no		no		2019-01-04	Total repair	9	other	>= 6.2 score	elective	elective	open heart	180	<240 min	103	>=85 min	>=90 min	CBP time > 90 min	75	>=60min
pre	171	male	2016-01-01	2016-01-02	14	>= 5kg	88.5	HRHS, TS, PS, RV hypoplasia	acyanosis	yes	no		no	no	no	no	no		no	no	no	no		no		2	class 1-2	no	no	no		no		2019-01-08	One and a half repair (BDG, RVOT reconstruction, ASD Closure	9	other	>= 6.2 score	elective	elective	open heart	195	<240 min	105	>=85 min	>=90 min	CBP time > 90 min	18	<60 min
post	137	male	2011-07-25	2011-07-25	16.5	>= 5kg	116.5	UVH (DILV) s/p BDG with complete heat block	cyanosis	yes	no		no	no	no	no	no		no	no	yes	yes	BDG 24.03.2012	no		1	class 1-2	no	no	yes	sidenafil	no		2019-07-12	Extracardiac fontan	9	other	>= 6.2 score	elective	elective	open heart	195	<240 min	127	>=85 min	>=90 min	CBP time > 90 min	27	<60 min
pre	175	male	2009-07-16	2009-07-16	25	>= 5kg	130	UVH, PA s/p RMBTS, BDG 19.09.2011	cyanosis	yes	no		no	no	no	no	no		yes	no	no	yes	BDG 19.09.2011	no		2	class 1-2	no	no	yes	amoxycillin, ASA	no		2019-01-11	Completion of extracardiac Fontan procedure with pulmonary arterioplasty	9	other	>= 6.2 score	elective	elective	open heart	180	<240 min	104	>=85 min	>=90 min	CBP time > 90 min	#NULL!	#NULL!
post	163	male	2008-04-18	#NULL!	23	>= 5kg	80	CACV with supracardiac type TAPVR s/p TAPVR repair and bilateral BDG, fontan procedure	cyanosis	yes	no		no	no	no	no	no		yes	no	no	yes	TAPVT repair and bilateral BDG 23.03.2014, fontan 30.08.2019	no		2	class 1-2	no	no	no		no		2019-08-30	Completion of extracardiac fontan	9	other	>= 6.2 score	elective	elective	open heart	170	<240 min	133	>=85 min	>=90 min	CBP time > 90 min	#NULL!	#NULL!
pre	74	male	2018-01-04	2018-01-04	6.1	>= 5kg	74	Complete AVSD, Rastelli's type A, PAH	acyanosis	no	yes	Down syndrome	yes	no	no	no	yes	Congenital hypothyroid	no	yes	yes	no		no		3	class 3-4	no	no	no		no		2019-03-15	Total repair	9	other	>= 6.2 score	elective	elective	open heart	180	<240 min	118	>=85 min	>=90 min	CBP time > 90 min	93	>=60min
post	219	female	2007-07-13	2007-10-23	24	>= 5kg	140	PA/VSD confluent PA, MAPCA	cyanosis	no	no		no	no	no	no	no		no	no	no	yes	Lt unifocalization 11.2007, RMBTS 2008	no		1	class 1-2	no	no	no		no		2019-11-27	Total repair	9	other	>= 6.2 score	elective	elective	open heart	235	<240 min	170	>=85 min	>=90 min	CBP time > 90 min	96	>=60min
pre	185	male	2012-03-27	2012-04-20	19	>= 5kg	117	UVH, PS s/p bilateral BDG 21.12.2018	cyanosis	yes	no		no	no	no	no	no		no	no	no	yes	BDG 21.12.2012	no		2	class 1-2	no	no	yes	ASA	no		2019-01-25	Extracardiac Fontan	9	other	>= 6.2 score	elective	elective	open heart	175	<240 min	106	>=85 min	>=90 min	CBP time > 90 min	#NULL!	#NULL!
post	227	female	2012-12-25	#NULL!	26.5	>= 5kg	127	UVH, severe sub PS, bilateral SVC, pulmonary sling s/p bilateral BDG with LPA relocation	cyanosis	yes	no		no	no	no	no	no		no	no	yes	yes	bilatreal BDG 24.10.2014	no		2	class 1-2	no	no	yes	sidenafil	no		2020-01-10	Completion of extra cardiac fontan	9	other	>= 6.2 score	elective	elective	open heart	155	<240 min	93	>=85 min	>=90 min	CBP time > 90 min	#NULL!	#NULL!
post	128	male	2006-12-05	2007-01-06	21	>= 5kg	128	PA/VSD s/p RMBTS LMBTS with partial thrombosed LMBTS	cyanosis	no	no		no	no	no	no	no		no	no	no	yes	RMBTS LMBTS	no		2	class 1-2	no	no	yes	ASA,aldactone	no		2019-06-28	Total repair	9	other	>= 6.2 score	elective	elective	open heart	205	<240 min	136	>=85 min	>=90 min	CBP time > 90 min	72	>=60min
pre	133	male	2014-06-07	2014-07-25	16.6	>= 5kg	103	crittical PS, hypoplastic RV s/p PBPV with residual moderate TS, moderate subvalvular PS	acyanosis	yes	no		no	no	no	no	no		no	yes	no	no		no		2	class 1-2	no	no	yes	lasix,aldactone, ASA	no		2018-09-25	One and a half repair (BDG, partial PFO closure, pulmonic valve commisuroplasty, transPA subvalvular resection, TV commisuroplasty)	9	other	>= 6.2 score	elective	elective	open heart	180	<240 min	109	>=85 min	>=90 min	CBP time > 90 min	37	<60 min
pre	261	male	2007-12-03	2007-12-03	53.5	>= 5kg	146	ccTGA, DOLV, remote VSD	cyanosis	yes	no		no	no	no	no	no		no	yes	no	yes	RMBTS 2552,BDG with RMBTS division 2556	no		2	class 1-2	no	no	no		no		2018-07-13	completion of extra cardiac Fontan with Gortex 20 mm	9	other	>= 6.2 score	elective	elective	open heart	165	<240 min	99	>=85 min	>=90 min	CBP time > 90 min	#NULL!	#NULL!
post	162	female	2016-02-06	2016-02-06	12	>= 5kg	94	TOF	cyanosis	no	yes	Down syndrome	yes	no	no	no	yes	Hypothyroid	no	no	no	no		no		2	class 1-2	no	no	yes	propanolol	no		2019-08-30	Total repair	8	other	>= 6.2 score	elective	elective	open heart	170	<240 min	97	>=85 min	>=90 min	CBP time > 90 min	67	>=60min
pre	129	male	2012-09-03	#NULL!	13	>= 5kg	100	TOF, PDA	cyanosis	no	yes	Down syndrome	yes	no	no	no	yes	AML, HIT, hypothyroidism	no	yes	no	no		no		2	class 1-2	no	no	yes	lasix,aldactone	no		2018-09-18	Total repair (VSD closure with Dacron patch, infundibulectomy and transannular patch with monocusp autologous pericardium)	8	other	>= 6.2 score	elective	elective	open heart	165	<240 min	98	>=85 min	>=90 min	CBP time > 90 min	67	>=60min
post	79	female	2018-10-15	2018-06-01	8	>= 5kg	78	TOF	cyanosis	no	no		no	no	no	no	no		no	no	no	no		no		3	class 3-4	no	no	yes	propanolol	no		2020-02-25	Total repair	8	other	>= 6.2 score	elective	elective	open heart	110	<240 min	110	>=85 min	>=90 min	CBP time > 90 min	64	>=60min
post	155	male	2018-11-28	2018-12-08	6.5	>= 5kg	69	TOF	cyanosis	no	no		no	no	no	no	no		no	no	no	no		no		2	class 1-2	no	no	yes	propanolol	no		2019-08-09	Total repair	8	other	>= 6.2 score	elective	elective	open heart	150	<240 min	106	>=85 min	>=90 min	CBP time > 90 min	79	>=60min
post	136	male	2016-04-05	#NULL!	12	>= 5kg	80	Pentalogy of fallot	cyanosis	no	no		no	no	no	no	no		no	no	no	no		no		2	class 1-2	no	no	yes	propanolol	no		2019-07-09	Total repair	8	other	>= 6.2 score	elective	elective	open heart	190	<240 min	123	>=85 min	>=90 min	CBP time > 90 min	73	>=60min
post	91	female	2015-01-19	2015-01-19	17	>= 5kg	104.5	TOF	cyanosis	no	no		no	no	no	no	no		no	no	no	no		no		2	class 1-2	no	no	yes	propanolol	no		2019-04-30	Total repair	8	other	>= 6.2 score	elective	elective	open heart	215	<240 min	130	>=85 min	>=90 min	CBP time > 90 min	96	>=60min
pre	166	female	2014-12-27	2015-01-07	14.2	>= 5kg	94	TOF	cyanosis	no	yes	Kabuki syndrome	no	no	no	yes	yes	GDD, hypothyroidism	no	no	no	no		no		2	class 1-2	no	no	yes	propanolol	no		2018-12-18	Total repair (VSD closure with gluteraldehyde treated pericardial patch, muscle bundle resection, subpulmonary RVOT augmentation with gluteraldehyde treated pericardium, PFO closure)	8	other	>= 6.2 score	elective	elective	open heart	165	<240 min	95	>=85 min	>=90 min	CBP time > 90 min	61	>=60min
post	104	male	2016-06-10	2016-06-10	11	>= 5kg	88	TOF	cyanosis	no	no		no	no	no	no	no		no	no	no	no		no		2	class 1-2	no	no	yes	propanolol	no		2019-05-14	Total repair	8	other	>= 6.2 score	elective	elective	open heart	195	<240 min	120	>=85 min	>=90 min	CBP time > 90 min	83	>=60min
post	96	female	2017-03-06	2017-03-06	10.5	>= 5kg	88	TOF	cyanosis	no	no		no	no	no	no	no		no	no	no	no		no		2	class 1-2	no	no	yes	propanolol	no		2019-05-07	Total repair	8	other	>= 6.2 score	elective	elective	open heart	215	<240 min	141	>=85 min	>=90 min	CBP time > 90 min	109	>=60min
pre	236	male	2002-08-05	2003-05-15	38.8	>= 5kg	170	Pulmonic valve regurgitation with RV dysfunction	acyanosis	no	no		no	no	no	no	yes	TOF s/p total repair	no	no	no	yes	TOF repair	no		2	class 1-2	no	no	no		no		2018-05-15	PVR using 25 mm Perimount aortic prosthesis and MPA augmentation (on pump beating heart)	8	other	>= 6.2 score	elective	elective	open heart	170	<240 min	96	>=85 min	>=90 min	CBP time > 90 min	#NULL!	#NULL!
post	106	female	2007-05-31	2007-05-31	29.4	>= 5kg	140	TOF with severe subvalvular and valvular PS with tiny PDA	cyanosis	no	no		no	no	no	no	no		no	no	no	no		no		2	class 1-2	no	no	no		no		2019-05-17	Total repair	8	other	>= 6.2 score	elective	elective	open heart	195	<240 min	101	>=85 min	>=90 min	CBP time > 90 min	129	>=60min
post	193	male	2017-08-29	2017-05-29	13	>= 5kg	84	TOF with PDA	cyanosis	no	no		no	no	no	no	no		no	no	no	no		no		1	class 1-2	no	no	no		no		2019-11-08	Total repair	8	other	>= 6.2 score	elective	elective	open heart	164	<240 min	98	>=85 min	>=90 min	CBP time > 90 min	64	>=60min
post	8	male	2018-11-05	2018-11-16	7.5	>= 5kg	64	TOF	cyanosis	no	no		no	no	no	no	no		no	no	no	no		no		3	class 3-4	no	no	yes	propanolol	no		2019-09-13	Total repair	8	other	>= 6.2 score	elective	elective	open heart	140	<240 min	94	>=85 min	>=90 min	CBP time > 90 min	71	>=60min
pre	260	male	2017-02-07	2017-02-16	7.77	>= 5kg	78	TOF with subvalvular stenosis, Secundum ASD	cyanosis	no	no		no	no	no	no	yes	G6PD deficiency	no	yes	no	no		no		3	class 3-4	no	no	yes	Lasix,aldactone	no		2018-07-11	Total repair	8	other	>= 6.2 score	elective	elective	open heart	155	<240 min	90	>=85 min	>=90 min	CBP time > 90 min	65	>=60min
pre	95	male	2003-09-12	2003-12-20	34	>= 5kg	155	TOF	cyanosis	no	no		no	no	no	no	no		no	no	no	yes	RMBTS feb 2010	no		2	class 1-2	no	no	no		no		2019-02-01	Total repair	8	other	>= 6.2 score	elective	elective	open heart	215	<240 min	137	>=85 min	>=90 min	CBP time > 90 min	90	>=60min
post	215	male	2011-05-25	2011-06-05	21.7	>= 5kg	120	TOF with anomalous RCA from LAD	cyanosis	no	no		no	no	no	no	no		no	no	no	no		no		2	class 1-2	no	no	yes	propanolol	no		2019-12-18	Total repair	8	other	>= 6.2 score	elective	elective	open heart	220	<240 min	123	>=85 min	>=90 min	CBP time > 90 min	96	>=60min
pre	36	male	2017-03-22	2017-07-01	10	>= 5kg	79	TOF	cyanosis	no	no		no	no	no	no	no		no	no	no	no		no		2	class 1-2	no	no	yes	Propanolol	no		2018-11-21	Total repair	8	other	>= 6.2 score	elective	elective	open heart	215	<240 min	129	>=85 min	>=90 min	CBP time > 90 min	100	>=60min
post	183	male	2009-07-04	2010-12-21	18.9	>= 5kg	126.7	TOF	cyanosis	no	no		no	no	no	no	no		no	no	no	no		no		1	class 1-2	no	no	yes	propanolo	no		2019-10-09	Total repair	8	other	>= 6.2 score	elective	elective	open heart	185	<240 min	117	>=85 min	>=90 min	CBP time > 90 min	89	>=60min
pre	201	male	2009-11-29	#NULL!	21	>= 5kg	124	Severe valvular AR and severe subvalvular AS S/P AP window division with and subaortic ridge resection	acyanosis	no	no		no	no	no	no	no		no	yes	no	yes	Repair APW, suAo ridge resection 09.08.2010	no		2	class 1-2	no	no	yes	captopril	no		2019-02-22	AV repair(LCC replacement using gluteraldehyde-treated autologous pericardial patch) and subaortic ridge resection	8	other	>= 6.2 score	elective	elective	open heart	190	<240 min	117	>=85 min	>=90 min	CBP time > 90 min	67	>=60min
pre	253	male	2017-04-11	#NULL!	7.94	>= 5kg	72.6	TOF	cyanosis	no	no		no	no	no	no	no		no	no	no	no		no		3	class 3-4	no	no	yes	Propanolol	no		2018-06-26	Total repair	8	other	>= 6.2 score	elective	elective	open heart	220	<240 min	145	>=85 min	>=90 min	CBP time > 90 min	111	>=60min
post	210	male	2016-11-19	#NULL!	8.4	>= 5kg	82	TOF, slightly hypoplastic RPA	cyanosis	no	no		no	no	no	no	no		no	no	no	no		no		3	class 3-4	no	no	yes	propanlol	no		2019-12-06	Total repair	8	other	>= 6.2 score	elective	elective	open heart	195	<240 min	129	>=85 min	>=90 min	CBP time > 90 min	95	>=60min
pre	151	male	2012-08-03	2012-10-16	18.7	>= 5kg	112	Truncus arteriosus type I S/P total repaire with pulmonic homograft No.16 at 22/1/2556, RVOTO s/p stent RVOT, progressive stenosis	cyanosis	no	no		no	no	no	no	yes	GDD, polydactyle	no	yes	no	no		no		2	class 1-2	no	no	yes	lasix, aldactone, lanoxin	no		2018-11-15	Redo PVR with RV-PA conduit (20 mm Goretex tube with 0.1 mm goretex membrane trileaflet valve)	8	other	>= 6.2 score	elective	elective	open heart	110	<240 min	91	>=85 min	>=90 min	CBP time > 90 min	56	<60 min
post	100	male	2015-10-14	2015-10-14	10	>= 5kg	93	TOF with subvalvular stenosis with ASD secundum	cyanosis	no	no		no	no	no	no	no		no	no	no	no		no		3	class 3-4	no	no	yes	propanolol	no		2019-05-10	Total repair	8	other	>= 6.2 score	elective	elective	open heart	210	<240 min	95	>=85 min	>=90 min	CBP time > 90 min	65	>=60min
pre	128	female	2006-06-01	2006-07-01	36.5	>= 5kg	150	TOF post total repair with transannular patch, Right ventricular dialtation and dysfunction	cyanosis	no	no		no	no	no	no	no		no	yes	no	yes	RMBTS, total repair TOF 1.11.2008	no		2	class 1-2	no	no	yes	lasix,aldactone	no		2018-09-14	Redo PVR with 18 mm Goretex valve conduit, PDA closure (internal ligation)	8	other	>= 6.2 score	elective	elective	open heart	215	<240 min	95	>=85 min	>=90 min	CBP time > 90 min	47	<60 min
pre	244	male	2016-06-05	#NULL!	10.3	>= 5kg	85	Perimembranous VSD, severe coarctation, mild hypoplastic arch	acyanosis	no	no		no	no	no	no	no		no	yes	no	no		no		1	class 1-2	no	no	yes	Lasix	no		2018-07-20	Totol repair	8	other	>= 6.2 score	elective	elective	open heart	170	<240 min	104	>=85 min	>=90 min	CBP time > 90 min	72	>=60min
post	57	male	2016-08-01	2016-08-01	9.7	>= 5kg	84	TOF with mild proximal LPA stenosis	cyanosis	no	no		no	no	no	no	no		no	no	no	no		no		3	class 3-4	no	no	yes	propanolol	no		2019-04-02	Total repair	8	other	>= 6.2 score	elective	elective	open heart	165	<240 min	114	>=85 min	>=90 min	CBP time > 90 min	90	>=60min
post	209	female	2015-07-10	2015-07-10	19	>= 5kg	88.5	TOF with severe subvalvular PS	cyanosis	no	no		no	no	no	no	yes	Multiple anomalt	no	no	no	no		yes	pneumonia	3	class 3-4	no	no	yes	propanolol	no		2019-12-04	Total repair	8	other	>= 6.2 score	elective	elective	open heart	185	<240 min	116	>=85 min	>=90 min	CBP time > 90 min	80	>=60min
pre	220	female	2008-03-24	2008-06-25	22.6	>= 5kg	125	TOF with moderate subvulvular and vulvular PS	cyanosis	no	no		no	no	no	no	no		no	no	no	no		no		2	class 1-2	no	no	no		no		2018-04-03	Total Repair	8	other	>= 6.2 score	elective	elective	open heart	210	<240 min	131	>=85 min	>=90 min	CBP time > 90 min	100	>=60min
post	244	male	2015-01-22	2015-01-22	5.5	>= 5kg	104	TOF RCA from left cusp	cyanosis	no	no		no	no	no	no	no		no	no	no	no		no		2	class 1-2	no	no	yes	propanolol	no		2020-03-03	Total repair	8	other	>= 6.2 score	elective	elective	open heart	175	<240 min	113	>=85 min	>=90 min	CBP time > 90 min	79	>=60min
pre	263	male	2006-08-18	2006-08-18	34.8	>= 5kg	137	TOF with supravalvular and subvalvular PS	cyanosis	no	no		no	no	no	no	no		no	no	no	no		no		2	class 1-2	no	no	yes	Propanolol	no		2018-07-16	Total repair	8	other	>= 6.2 score	elective	elective	open heart	190	<240 min	107	>=85 min	>=90 min	CBP time > 90 min	81	>=60min
pre	111	female	2010-01-29	#NULL!	18	>= 5kg	121	TOF s/p LMBTS with ligation of MAPCA s/p PBPV	cyanosis	no	no		no	no	no	no	no		no	no	no	yes	LMBTS	no		2	class 1-2	no	no	no		no		2018-08-10	Total repair	8	other	>= 6.2 score	elective	elective	open heart	145	<240 min	98	>=85 min	>=90 min	CBP time > 90 min	57	<60 min
pre	137	male	2012-09-12	2012-09-12	15	>= 5kg	103	TOF	cyanosis	no	no		no	no	no	no	yes	bilateral CLCP	no	no	no	no		no		2	class 1-2	no	no	no		no		2018-10-02	Total correction of VSD/PS (transatrial VSD closure with gluteraldehyde-treated pericardial patch with primary closure of PFO with transRA/PA infundibulectomy with PV commissurotomy with main pulmonary arterioplasty)	8	other	>= 6.2 score	elective	elective	open heart	212	<240 min	119	>=85 min	>=90 min	CBP time > 90 min	91	>=60min
pre	60	male	2018-03-15	2018-03-15	7.1	>= 5kg	73	PA/IVS with unipartite RV, confluent PA with RV coronary sinusoid	cyanosis	no	no		no	no	no	no	no		no	no	no	yes	RMBTS, PDA ligation 20.03.2018	no		1	class 1-2	no	no	no		no		2018-12-28	BDG with atrial septostomy	7	other	>= 6.2 score	elective	elective	open heart	200	<240 min	102	>=85 min	>=90 min	CBP time > 90 min	6	<60 min
post	48	female	2018-06-11	2018-06-11	12	>= 5kg	80	UVH with PS, LPA stenosis	cyanosis	yes	no		no	no	no	no	no		yes	no	no	no		no		2	class 1-2	no	no	yes	propanolol	no		2020-02-18	BDG with LPA plasty	7	other	>= 6.2 score	elective	elective	open heart	210	<240 min	107	>=85 min	>=90 min	CBP time > 90 min	#NULL!	#NULL!
post	92	female	2016-11-08	2016-11-08	12.3	>= 5kg	91.5	UVH, PA confluent PA, MAPCAs	cyanosis	yes	no		no	no	no	no	no		no	yes	no	yes	PDA stent with BAS	no		2	class 1-2	no	no	no		no		2019-05-03	Glenn procedure with PA construction	7	other	>= 6.2 score	elective	elective	open heart	165	<240 min	104	>=85 min	>=90 min	CBP time > 90 min	#NULL!	#NULL!
pre	33	female	2012-01-04	2012-01-13	19.5	>= 5kg	122	UVH with TA	cyanosis	yes	no		no	no	no	no	no		no	no	no	yes	RMBTS 25.03.2014, LMBTS 10.03.2015	no		2	class 1-2	no	no	no		no		2018-10-26	BDG with PA plasty	7	other	>= 6.2 score	elective	elective	open heart	200	<240 min	120	>=85 min	>=90 min	CBP time > 90 min	#NULL!	#NULL!
pre	213	female	2016-08-15	2016-09-15	13	>= 5kg	86	Small inlet VSD, subaortic ridge	acyanosis	no	yes	Down syndrome	yes	no	no	no	yes	Bilateral OME post myringotomy	no	no	no	no		no		2	class 1-2	no	no	no		no		2019-03-22	VSD closure, resection subaortic ridge	6.3	6.3 score	>= 6.2 score	elective	elective	open heart	170	<240 min	110	>=85 min	>=90 min	CBP time > 90 min	83	>=60min
pre	86	male	2005-07-04	#NULL!	59	>= 5kg	166	HOCM with severe LVOTO	acyanosis	no	no		no	no	no	no	no		no	no	no	no		no		1	class 1-2	no	no	yes	Atenolol, Verapamil	no		2019-03-08	Septal myectomy	6.3	6.3 score	>= 6.2 score	elective	elective	open heart	170	<240 min	91	>=85 min	>=90 min	CBP time > 90 min	60	>=60min
post	2	male	2012-03-16	2012-03-16	33	>= 5kg	122	PA/VSD, non confluent PA, MAPCAs	cyanosis	no	no		no	no	no	no	yes	Autistic	no	no	no	yes	Rt unifocalization 28.10.2014	no		2	class 1-2	no	no	no		no		2019-05-17	Total repair	11	other	>= 6.2 score	elective	elective	open heart	335	>=240 min	154	>=85 min	>=90 min	CBP time > 90 min	88	>=60min
post	68	male	2012-09-18	2012-12-18	27	>= 5kg	120	UVH without PS	cyanosis	yes	no		no	no	no	no	no		no	no	no	yes	bilateral BDG with MPA banding 11.11.2013	no		2	class 1-2	no	no	yes	enalapril	no		2020-03-17	Extracardiac fontan	9	other	>= 6.2 score	elective	elective	open heart	325	>=240 min	131	>=85 min	>=90 min	CBP time > 90 min	#NULL!	#NULL!
pre	109	male	2015-02-26	2015-03-02	14	>= 5kg	97	TOF, mild to moderate PS, AP window	cyanosis	no	no		no	no	no	no	no		no	no	no	yes	AP window 10.04.2015	no		2	class 1-2	no	no	no		no		2018-08-09	Redo-total repair	8	other	>= 6.2 score	elective	elective	open heart	335	>=240 min	175	>=85 min	>=90 min	CBP time > 90 min	124	>=60min
post	261	female	2019-10-24	2019-10-30	3.4	< 5 kg	47	HLHS	cyanosis	no	no		no	no	no	no	no		no	yes	no	no		yes	neonatal sepsis	2	class 1-2	no	no	no		no		2019-11-11	Modified norwood operation with RMBTS	14.5	other	>= 6.2 score	elective	elective	open heart	420	>=240 min	149	>=85 min	>=90 min	CBP time > 90 min	96	>=60min
post	60	female	2005-11-25	2015-11-27	56	>= 5kg	163	PA/VSD, MAPCAs	cyanosis	no	no		no	no	no	no	no		no	no	no	yes	Rt unifocalization, MBTS 20.01.2015	no		2	class 1-2	no	no	no		no		2019-04-05	Lt unifocalization with total repai	11	other	>= 6.2 score	elective	elective	open heart	340	>=240 min	181	>=85 min	>=90 min	CBP time > 90 min	140	>=60min
pre	227	female	2010-08-08	#NULL!	20.1	>= 5kg	123	DORV with subaortic VSD with PA/VSD s/p LMBTS	cyanosis	no	no		no	no	no	no	no		no	no	no	yes	LMBTS	no		2	class 1-2	no	no	no		no		2018-04-26	Total repair using 18mm valve Goretex conduit with three leaflets 0.1mm thick membrane	11	other	>= 6.2 score	elective	elective	open heart	495	>=240 min	203	>=85 min	>=90 min	CBP time > 90 min	146	>=60min
pre	164	male	2009-12-03	2010-02-03	19.5	>= 5kg	120	ccTGa, VSd, PS	cyanosis	no	no		no	no	no	no	no		no	no	no	no		no		2	class 1-2	no	no	no		no		2018-12-14	Hemimustard, BDG, Rastelli 16 mm Contegra	11	other	>= 6.2 score	elective	elective	open heart	280	>=240 min	207	>=85 min	>=90 min	CBP time > 90 min	154	>=60min
pre	134	female	2009-05-18	2009-10-30	27	>= 5kg	125.6	Severe AS s/p PBAV, progressive AS, AR	acyanosis	no	no		no	no	no	no	no		no	yes	no	no		no		2	class 1-2	no	no	yes	lasix, enalapril	no		2018-09-28	Ross operation (pulmonic autograft and 18 mm and Contegra valve conduit)	10.3	other	>= 6.2 score	elective	elective	open heart	275	>=240 min	156	>=85 min	>=90 min	CBP time > 90 min	130	>=60min
post	239	female	2012-05-14	2012-05-14	20	>= 5kg	120	Dextrocardia, ccTGA, PA VSD s/p RMBTS LMBTS	cyanosis	no	no		no	no	no	no	no		no	no	no	yes	RMBTS 22.05.2012, LMBTS 11.02.2014	no		1	class 1-2	no	no	no		no		2020-02-07	Bidirectional Glenn, hemimustard, Rastelli operation	10	other	>= 6.2 score	elective	elective	open heart	395	>=240 min	250	>=85 min	>=90 min	CBP time > 90 min	158	>=60min
pre	130	female	2014-09-21	2014-09-21	11.8	>= 5kg	100	CoA, VSD s/p CoA repair at Yala hospital 1 month old, recoarctation	acyanosis	no	no		no	no	no	no	no		no	yes	no	yes	Coarctectomy at Yala hospital 1 month old	no		2	class 1-2	no	no	yes	lasix	no		2018-09-21	CoA repair with patch aortoplasty, VSD closure	10	other	>= 6.2 score	elective	elective	open heart	270	>=240 min	119	>=85 min	>=90 min	CBP time > 90 min	65	>=60min
pre	162	male	2013-08-07	2014-07-09	12.4	>= 5kg	105	PA/VSD s/p 5 mm RMBTS (02.08.2015)	cyanosis	no	no		no	no	no	no	yes	multiple anomalies; scoliosis, hemivertebrae L3	no	no	no	yes	RMBTS 02.08.2015	no		2	class 1-2	no	no	yes	ASA	no		2018-12-03	Total repair(RMBT shunt ligation, VSD closure using gluteraldehyde treated pericardial patch, collateral vessels ligation, RV-PA coduit using Contegra No 14 , and flap PFO creation)	10	other	>= 6.2 score	elective	elective	open heart	270	>=240 min	190	>=85 min	>=90 min	CBP time > 90 min	127	>=60min
pre	184	male	2017-12-01	#NULL!	10	>= 5kg	76	TOF	cyanosis	no	no		no	no	no	no	no		no	no	no	yes	RMBTS 13.12.2017	no		2	class 1-2	no	no	yes	ASA	no		2019-01-25	Rastelli operation(LV-Ao tunnel with pericardial patch, RV-PA conduit with 14 mm. Contegra) with RMBTS & PDA ligation	10	other	>= 6.2 score	elective	elective	open heart	260	>=240 min	158	>=85 min	>=90 min	CBP time > 90 min	111	>=60min
pre	163	male	2016-07-04	2016-07-04	8.8	>= 5kg	84	TOF, APV s/p RMBTS 11.07.2016	cyanosis	no	no		no	no	no	no	yes	recurrent pneumonia, bronchiectasis Rt lung, LUL atelectasis	no	yes	no	yes	RMBTS 11.07.2016	no		2	class 1-2	no	no	yes	ASA, lasix, aldactone	no		2018-12-04	Total repair APV,bicuspidzed RVOT reconstruction, MPA,RPA plication	9.3	other	>= 6.2 score	elective	elective	open heart	300	>=240 min	204	>=85 min	>=90 min	CBP time > 90 min	147	>=60min
post	9	female	2013-07-27	2013-08-21	17	>= 5kg	112.8	PA/VSD s/p RMBTS	cyanosis	no	no		no	no	no	no	no		no	no	no	yes	RMBTS 21.11.2013	no		3	class 3-4	no	no	no		no		2019-07-08	Total repai with direct PFO closure	9	other	>= 6.2 score	elective	elective	open heart	360	>=240 min	219	>=85 min	>=90 min	CBP time > 90 min	165	>=60min
pre	282	female	2015-05-28	2015-05-28	9.8	>= 5kg	89	Complete AVSD (Rastelli type A) PDA with pulmonary HT	acyanosis	no	yes	Down syndrome	yes	no	no	no	no		no	yes	yes	no		no		3	class 3-4	no	no	no		no		2018-07-06	Total repair	9	other	>= 6.2 score	elective	elective	open heart	255	>=240 min	150	>=85 min	>=90 min	CBP time > 90 min	119	>=60min
pre	170	female	2012-09-19	2013-02-19	22	>= 5kg	113	UVH, unbalanced AVSD, PS s/p BDG 28.07.2015	cyanosis	yes	no		no	no	no	no	yes	Hiatal hernia	yes	no	no	yes	BDG 28.07.2015	no		2	class 1-2	no	no	yes	Amoxycillin, ASA, carvedilol	no		2019-01-07	Extracardiac Fontan	9	other	>= 6.2 score	elective	elective	open heart	350	>=240 min	174	>=85 min	>=90 min	CBP time > 90 min	#NULL!	#NULL!
pre	235	male	2010-03-29	2013-07-16	16.4	>= 5kg	116.5	Unobstructed supracardiac TAPVR, ASD secundum	cyanosis	no	no		no	no	no	no	no		no	yes	yes	no		no		2	class 1-2	no	no	yes	Sidenafil	no		2018-05-15	1. Total repair TAPVR(common PV to LA anastomosis) 2. Vertical vein ligation 3. Direct closure of ASD	9	other	>= 6.2 score	elective	elective	open heart	255	>=240 min	138	>=85 min	>=90 min	CBP time > 90 min	53	<60 min
post	250	female	2008-04-11	2008-04-11	30.6	>= 5kg	138	Lt isomerism, dextrocardia, CACV, UVH, severe common AVVR, subvalvular PS s/p pulsatile bilateral BDG	cyanosis	yes	no		no	no	no	no	no		yes	yes	yes	yes	BDG 01.10.2009, redo-AVV 11.11.2016	no		2	class 1-2	no	no	yes	lasix,aldactone,enalapril	no		2020-03-13	Extracardiac fontan	9	other	>= 6.2 score	elective	elective	open heart	246	>=240 min	177	>=85 min	>=90 min	CBP time > 90 min	37	<60 min
post	248	male	2016-12-20	#NULL!	10.5	>= 5kg	91	TOF s/p RMBTS with mild proximal RMBTS stenosis	cyanosis	no	no		no	no	no	no	no		no	no	no	yes	RMBTS 14.08.2017	no		2	class 1-2	no	no	no		no		2020-03-10	Total repair	8	other	>= 6.2 score	elective	elective	open heart	255	>=240 min	142	>=85 min	>=90 min	CBP time > 90 min	91	>=60min
pre	183	female	2016-09-11	2016-09-17	11	>= 5kg	80	TOF	cyanosis	no	no		no	no	no	no	no		no	no	no	yes	LMBTS 20.08.2016	no		2	class 1-2	no	no	yes	ASA	no		2019-01-22	Total repair (1.VSD patching 2.Rastelli operation (native RVOT left in situ), 3.Infundibulectomy, 4.LMBTs takedown, ASD closure)	8	other	>= 6.2 score	elective	elective	open heart	295	>=240 min	202	>=85 min	>=90 min	CBP time > 90 min	138	>=60min
pre	98	male	2016-05-31	2016-05-31	11	>= 5kg	89	TOF with absent PV	cyanosis	no	no		no	no	no	no	no		no	yes	no	no		no		2	class 1-2	no	no	yes	lasix,aldactone	no		2019-01-29	Total repair	8	other	>= 6.2 score	elective	elective	open heart	255	>=240 min	174	>=85 min	>=90 min	CBP time > 90 min	133	>=60min
post	230	male	2015-11-13	#NULL!	12.8	>= 5kg	98	TOF, ASD	cyanosis	no	no		no	no	no	no	no		no	no	no	no		no		1	class 1-2	no	no	yes	propanolol	no		2020-01-20	Total repiar	8	other	>= 6.2 score	elective	elective	open heart	245	>=240 min	165	>=85 min	>=90 min	CBP time > 90 min	123	>=60min
pre	100	female	2014-11-20	2014-11-20	11	>= 5kg	94	TOF with hypoplasia of LPA with MAPCAs s/p PBPV, RMBTS	cyanosis	no	no		no	no	no	no	no		no	no	no	yes	RMBTS 24.04.2016	no		2	class 1-2	no	no	no		no		2018-07-24	Total repair	8	other	>= 6.2 score	elective	elective	open heart	365	>=240 min	242	>=85 min	>=90 min	CBP time > 90 min	141	>=60min
pre	258	female	2013-12-27	2014-06-06	11.5	>= 5kg	95.4	TOF	cyanosis	no	no		no	no	no	no	no		no	no	no	yes	RMBTS 07.2016	no		2	class 1-2	no	no	no		no		2018-07-03	Total repair	8	other	>= 6.2 score	elective	elective	open heart	300	>=240 min	215	>=85 min	>=90 min	CBP time > 90 min	150	>=60min
post	151	female	2011-07-03	2012-12-01	19.5	>= 5kg	999	TOF s/p RMBTS	cyanosis	no	yes	Nooonan syndrome	no	no	no	yes	yes	Spastic CP with HIE	no	no	no	yes	RMBTS 03.11.2015	no		1	class 1-2	no	no	no		no		2019-08-05	Total repair	8	other	>= 6.2 score	elective	elective	open heart	380	>=240 min	244	>=85 min	>=90 min	CBP time > 90 min	177	>=60min
post	206	male	2006-09-01	2006-09-19	32	>= 5kg	140	TOF with PDA	cyanosis	no	no		no	no	no	no	no		no	no	no	no		no		3	class 3-4	no	no	yes	propanolol	no		2019-11-25	Total repair with PDA ligation	8	other	>= 6.2 score	elective	elective	open heart	255	>=240 min	144	>=85 min	>=90 min	CBP time > 90 min	117	>=60min
pre	138	female	2004-11-15	2005-07-20	43	>= 5kg	155	Truncus arteriosus type I post total repair using 16 mm Hancock valve conduit	cyanosis	no	no		no	no	no	no	no		no	no	no	no		no		2	class 1-2	no	no	no		no		2018-10-04	Redo PVR RV-PA conduit replacement using 20 mm Goretex valve conduit	8	other	>= 6.2 score	elective	elective	open heart	260	>=240 min	114	>=85 min	>=90 min	CBP time > 90 min	60	>=60min
pre	199	female	2006-10-21	2006-12-10	49	>= 5kg	155	Truncus arteriosus type I s/p Ratelli Handcock 14 mm	cyanosis	no	no		no	no	no	no	yes	GDD, myopia	no	yes	no	yes	Rastelli Handcock 14 mm	no		2	class 1-2	no	no	yes	lasix	no		2019-02-21	Redo PVR with RV-PA conduit (22 mm Goretex tube with 0.1 mm goretex membrane trileaflet valve) + Direct residual VSD closure	8	other	>= 6.2 score	elective	elective	open heart	265	>=240 min	106	>=85 min	>=90 min	CBP time > 90 min	76	>=60min
post	111	male	2012-10-04	2016-11-03	20	>= 5kg	119	TOF	cyanosis	no	no		no	no	no	no	no		no	no	no	no		no		3	class 3-4	no	no	no		no		2019-05-24	Total repair	8	other	>= 6.2 score	elective	elective	open heart	245	>=240 min	178	>=85 min	>=90 min	CBP time > 90 min	94	>=60min
pre	247	male	2013-05-22	2014-01-06	12.6	>= 5kg	101	TOF with severe subvalvular PS	cyanosis	no	no		no	no	no	no	no		no	no	no	yes	RMBTS 18.11.2014	no		2	class 1-2	no	no	yes	ASA	no		2018-06-10	Total repair with RMBTS ligation	8	other	>= 6.2 score	elective	elective	open heart	290	>=240 min	173	>=85 min	>=90 min	CBP time > 90 min	140	>=60min
pre	205	female	2011-02-20	2011-03-20	20.5	>= 5kg	117	DORV with severe subvulvular PS and VSD s/p PBPV and RBMTS	cyanosis	no	no		no	no	no	no	no		no	no	no	yes	RMBTS 28.11.2012	no		2	class 1-2	no	no	yes	ASA	no		2019-02-25	Total repair(VSD closure with gluteraldehyde-treated pericardial patch, Infundibulectomy, Transannular patch with bovine pericardial patch, Pulmonic monocusp valve creation with 0.1 mm PTFE patch) and RMBTS ligation	8	other	>= 6.2 score	elective	elective	open heart	250	>=240 min	148	>=85 min	>=90 min	CBP time > 90 min	110	>=60min
post	152	female	2004-12-20	#NULL!	30.5	>= 5kg	157	TOF s/p LMBTS RMBTS	cyanosis	no	no		no	no	no	no	no		no	no	no	yes	RMBTS, LMBTS	no		1	class 1-2	no	no	no		no		2019-08-08	Total repair	8	other	>= 6.2 score	elective	elective	open heart	270	>=240 min	150	>=85 min	>=90 min	CBP time > 90 min	121	>=60min
post	180	female	2014-02-02	2014-02-16	15	>= 5kg	109.5	TOF s/p RMBTS	cyanosis	no	no		no	no	no	no	no		no	no	no	yes	RMBTS 21.12.2014	no		3	class 3-4	no	no	no		no		2019-09-30	Total repair	8	other	>= 6.2 score	elective	elective	open heart	255	>=240 min	143	>=85 min	>=90 min	CBP time > 90 min	101	>=60min
pre	269	male	2017-03-02	#NULL!	8.3	>= 5kg	70	Unbalanced AVSD, bilateral SVC s/p LMBTS	acyanosis	yes	no		no	no	no	no	no		yes	no	no	yes	LMBTS 09.03.2017	no		2	class 1-2	no	no	no		no		2018-05-01	Bilateral BDG, ligation of LMBTS	7.5	other	>= 6.2 score	elective	elective	open heart	290	>=240 min	114	>=85 min	>=90 min	CBP time > 90 min	#NULL!	#NULL!
post	165	male	2014-06-05	#NULL!	13	>= 5kg	96	DORV double discordant, severe subvalve and valvular PS, bilateral SVC	cyanosis	no	no		no	no	no	no	no		no	no	no	no		no		2	class 1-2	no	no	yes	propanolol	no		2019-09-05	Atrial septectomy with bilateral bidirectional Genn shunt with MPA ligation	7.5	other	>= 6.2 score	elective	elective	open heart	240	>=240 min	140	>=85 min	>=90 min	CBP time > 90 min	13	<60 min
pre	167	male	2017-06-01	2017-06-01	7.4	>= 5kg	79.5	UVH, PA s/p LMBTS 25.07.2018	cyanosis	yes	no		no	no	no	no	no		no	no	no	no		no		2	class 1-2	no	no	yes	ASA	no		2018-12-25	BDG, RPA plasty	7.5	other	>= 6.2 score	elective	elective	open heart	240	>=240 min	104	>=85 min	>=90 min	CBP time > 90 min	#NULL!	#NULL!
post	258	female	2019-09-05	#NULL!	2.7	< 5 kg	48	Large inlet VSD with hypoplastic aortic atch, tiny PDA, small ASD secundum	acyanosis	no	no		no	no	no	no	no		no	yes	no	no		yes	late neonatal sepsis	2	class 1-2	no	no	no		yes	Cefotaxime,amikacin	2019-09-20	Arch reconstruction, VSD closure, ASD closure	7	other	>= 6.2 score	elective	elective	open heart	365	>=240 min	258	>=85 min	>=90 min	CBP time > 90 min	87	>=60min
post	124	male	2017-12-31	2018-01-04	12.4	>= 5kg	82	UVH post TAPVR with CVP stenosis	cyanosis	yes	no		no	no	no	no	no		yes	yes	no	yes	TAPVR repair 24.01.2018	no		2	class 1-2	no	no	yes	aldactone,propanolol	no		2019-06-25	Redo-BDG with PA banding	7	other	>= 6.2 score	elective	elective	open heart	380	>=240 min	207	>=85 min	>=90 min	CBP time > 90 min	61	>=60min
post	251	male	2017-02-11	#NULL!	14.2	>= 5kg	96	Rt isomerism, large primum ASD, common ventricle, severe PS, bilateral PA stenosis	cyanosis	yes	no		no	no	no	no	no		yes	no	no	no		no		1	class 1-2	no	no	no		no		2020-03-17	Lt bidirectional Glenn shunt with PA plasty	7	other	>= 6.2 score	elective	elective	open heart	240	>=240 min	148	>=85 min	>=90 min	CBP time > 90 min	#NULL!	#NULL!
pre	154	female	2017-03-11	#NULL!	7.4	>= 5kg	73	ccTGA, VSD, PA s/p RMBTS 20.03.2017	cyanosis	no	no		no	no	no	no	no		no	no	no	yes	RMBTS 20.03.2017	no		2	class 1-2	no	no	yes	ASA	no		2018-11-19	5 mm LMBTS	6.3	6.3 score	>= 6.2 score	urgency	emergency or urgency	closed heart	180	<240 min	#NULL!	#NULL!	no	closed and < 90 min	#NULL!	#NULL!
post	121	male	2016-11-28	2016-12-07	15.5	>= 5kg	91	PA/VSD confluent small PA, MAPCA	cyanosis	no	yes	DiGeorge syndrome	no	yes	no	no	no		no	no	no	no		no		2	class 1-2	no	no	no		no		2019-06-21	LMBTS	6.3	6.3 score	>= 6.2 score	elective	elective	closed heart	80	<240 min	#NULL!	#NULL!	no	closed and < 90 min	#NULL!	#NULL!
pre	99	male	2014-05-03	#NULL!	13	>= 5kg	98	TOF with hypoxic spell	cyanosis	no	no		no	no	no	no	no		no	no	no	no		no		3	class 3-4	no	no	no		no		2018-07-23	RMBTS	6.3	6.3 score	>= 6.2 score	emergency	emergency or urgency	closed heart	60	<240 min	#NULL!	#NULL!	no	closed and < 90 min	#NULL!	#NULL!
post	214	male	2015-02-11	2015-04-02	16.3	>= 5kg	106	PA/VSD MAPCAs, small confluent PA	cyanosis	no	no		no	no	no	no	no		no	no	no	no		no		2	class 1-2	no	no	no		no		2019-12-16	LMBTS, Rt unifocalization	11	other	>= 6.2 score	elective	elective	closed heart	150	<240 min	#NULL!	#NULL!	no	closed and < 90 min	#NULL!	#NULL!
pre	284	male	2018-06-19	#NULL!	3.4	< 5 kg	54	Severe CoA	acyanosis	no	no		no	no	no	no	no		no	no	no	no		no		2	class 1-2	no	no	no		no		2018-07-10	Coarctectomy	8	other	>= 6.2 score	elective	elective	closed heart	94	<240 min	#NULL!	#NULL!	no	closed and < 90 min	#NULL!	#NULL!
pre	275	female	2013-09-24	2015-12-01	19	>= 5kg	112	Post ductal CoA, small outlet VSD	acyanosis	no	no		no	no	no	no	no		no	no	no	no		no		2	class 1-2	no	no	no		no		2018-06-04	Coarctation repair with PDA ligation	8	other	>= 6.2 score	elective	elective	closed heart	190	<240 min	#NULL!	#NULL!	no	closed and < 90 min	#NULL!	#NULL!
pre	168	male	2016-10-18	#NULL!	8.2	>= 5kg	83	CoA, hypoplastic arch, PDA	acyanosis	no	no		no	no	no	no	no		no	yes	no	no		yes	Pneumonia 5-13/11/2018	2	class 1-2	no	no	yes	lasix, aldactone	no		2018-12-26	Coarctectomy	8	other	>= 6.2 score	elective	elective	closed heart	75	<240 min	#NULL!	#NULL!	no	closed and < 90 min	19	<60 min
pre	112	female	2016-09-21	2018-06-18	8.3	>= 5kg	78	Juxtaductal CoA with PDA with abberant Rt subclavian artery from coarctation site	acyanosis	no	no		no	no	no	no	no		no	yes	no	no		yes	pneumonia	3	class 3-4	no	no	no		no		2018-08-10	Coarctectomy with end to end anastomosis with PDA division with Rt subclavian division	8	other	>= 6.2 score	elective	elective	closed heart	115	<240 min	#NULL!	#NULL!	no	closed and < 90 min	24	<60 min
post	211	male	2017-10-14	#NULL!	12	>= 5kg	88	CoA, PDA, bicuspid aortic valve	acyanosis	no	no		no	no	no	no	no		no	no	no	no		yes	pneumonia	1	class 1-2	no	no	no		no		2019-12-09	Extended coarctectomy with end to end anastomosis and PDA division	8	other	>= 6.2 score	elective	elective	closed heart	125	<240 min	#NULL!	#NULL!	no	closed and < 90 min	25	<60 min
post	139	female	2018-10-04	2018-10-20	5.2	>= 5kg	60	CoA with PDA	acyanosis	no	yes	Down syndrome	yes	no	no	no	yes	congenital hypothyroid	no	yes	no	no		no		3	class 3-4	no	no	no		no		2019-07-19	CoA repair with extended coarctectomy and end to end anastomosis with PDA devision	7.5	other	>= 6.2 score	elective	elective	closed heart	90	<240 min	#NULL!	#NULL!	no	closed and < 90 min	24	<60 min
pre	35	male	2017-10-09	2017-10-09	6.3	>= 5kg	71	DORV subaortic VSD, no PS with absent RPA and hypoplastic Right lung	cyanosis	no	yes	Multiple anomaly	no	no	no	yes	yes	GDD, Hyperopia	no	yes	no	no		no		2	class 1-2	no	no	no		no		2018-11-02	Total repair	7	other	>= 6.2 score	elective	elective	open heart	120	<240 min	#NULL!	#NULL!	no	closed and < 90 min	#NULL!	#NULL!
pre	239	female	2015-08-25	#NULL!	10	>= 5kg	85	TA with moderate PS	cyanosis	no	no		no	no	no	no	yes	Ectopia cardis	no	no	no	no		no		2	class 1-2	no	no	no		no		2018-05-25	Off pump bidirectional Glenn operation via Rt thoracotomy	7	other	>= 6.2 score	elective	elective	closed heart	85	<240 min	#NULL!	#NULL!	no	closed and < 90 min	#NULL!	#NULL!
post	158	male	2019-01-03	2019-07-13	6.8	>= 5kg	70	PA/IVS	cyanosis	no	no		no	no	no	no	no		no	no	no	no		no		3	class 3-4	no	no	no		no		2019-08-23	Ascending aorta to RPA shunt	6.8	other	>= 6.2 score	elective	elective	closed heart	90	<240 min	#NULL!	#NULL!	no	closed and < 90 min	#NULL!	#NULL!
post	56	male	2017-11-16	#NULL!	10.6	>= 5kg	85	TOF wiyh severe valve and subvalve PS	cyanosis	no	no		no	no	no	no	no		no	no	no	no		no		3	class 3-4	no	no	yes	propanolol	no		2020-04-01	RMBTS	6.3	6.3 score	>= 6.2 score	elective	elective	closed heart	145	<240 min	#NULL!	#NULL!	no	closed and < 90 min	#NULL!	#NULL!
pre	121	female	2018-08-03	2018-08-03	2.6	< 5 kg	49	PA/IVS	cyanosis	yes	no		no	no	no	no	no		no	no	no	no		no		3	class 3-4	no	no	yes	PGE1	no		2018-08-30	RMBTS 3.5 mm	6.3	6.3 score	>= 6.2 score	urgency	emergency or urgency	closed heart	140	<240 min	#NULL!	#NULL!	no	closed and < 90 min	#NULL!	#NULL!
pre	29	female	2015-01-01	2015-01-01	9.6	>= 5kg	88	PA/VSD, confluent PA, PDA	cyanosis	no	no		no	no	no	no	no		no	no	no	yes	RMBTS 12.01.2015	no		2	class 1-2	no	no	no		no		2018-10-22	LMBTS	6.3	6.3 score	>= 6.2 score	elective	elective	open heart	200	<240 min	#NULL!	#NULL!	no	closed and < 90 min	#NULL!	#NULL!
pre	108	female	2003-03-02	#NULL!	51	>= 5kg	158	ccTGA,PA, large perimembranous to inlet VSD, small LPA	cyanosis	no	no		no	no	no	no	yes	recurrent SVT	no	no	no	yes	central shunt 24.06.2008	no		2	class 1-2	no	no	yes	atenolol,flecanide	no		2018-08-09	RMBTS	6.3	6.3 score	>= 6.2 score	elective	elective	closed heart	120	<240 min	#NULL!	#NULL!	no	closed and < 90 min	#NULL!	#NULL!
pre	78	female	2018-04-25	2018-04-25	6.2	>= 5kg	63	DORV subaortic VSD, subvalvular and supravalvular PS and hypoplastic of LPA	cyanosis	no	yes	OAV spectrum	no	no	no	yes	yes	Oromotor dysfunction	no	no	no	no		no		2	class 1-2	no	no	yes	Propanolol	no		2019-03-28	RMBTS	6.3	6.3 score	>= 6.2 score	elective	elective	open heart	75	<240 min	#NULL!	#NULL!	no	closed and < 90 min	#NULL!	#NULL!
post	31	female	2016-10-21	2017-01-01	8.3	>= 5kg	85	TOF with hypoplastic LPA with severe subvalvular and valvular PS with suspected LAD	cyanosis	no	no		no	no	no	no	yes	2 degree AV block	no	no	no	no		no		3	class 3-4	no	no	no		no		2019-12-02	RMBTS with pacemaker	6.3	6.3 score	>= 6.2 score	elective	elective	closed heart	155	<240 min	#NULL!	#NULL!	no	closed and < 90 min	#NULL!	#NULL!
post	71	male	2015-05-15	2015-05-15	13.3	>= 5kg	95	Severe TOF	cyanosis	no	no		no	no	no	no	no		no	no	no	no		no		2	class 1-2	no	no	yes	propanolo	no		2020-03-10	RMBTS	6.3	6.3 score	>= 6.2 score	elective	elective	closed heart	155	<240 min	#NULL!	#NULL!	no	closed and < 90 min	#NULL!	#NULL!
post	190	male	2017-07-16	2017-10-01	11	>= 5kg	98	TOF with LV hypoplasia	cyanosis	no	no		no	no	no	no	no		no	no	no	no		no		2	class 1-2	no	no	yes	propanolol	no		2019-11-05	RMBTS	6.3	6.3 score	>= 6.2 score	elective	elective	closed heart	135	<240 min	#NULL!	#NULL!	no	closed and < 90 min	#NULL!	#NULL!
pre	155	female	2017-09-09	#NULL!	7.2	>= 5kg	75	PA/VSD s/p RMBTS 27.10.2017	cyanosis	no	no		no	no	no	no	yes	multiple anomalies, exotropia, clinodactyle, GDD	no	no	no	yes	RMBTS 27.10.2017	no		2	class 1-2	no	no	yes	ASA	no		2018-11-20	4 mm LMBTS	6.3	6.3 score	>= 6.2 score	urgency	emergency or urgency	closed heart	70	<240 min	#NULL!	#NULL!	no	closed and < 90 min	#NULL!	#NULL!
pre	31	male	2016-06-28	2016-06-28	10.2	>= 5kg	84	PA/VSD, confluent PA	cyanosis	no	no		no	no	no	no	no		no	no	no	yes	RMBTS 21.07.2016	no		2	class 1-2	no	no	no		no		2018-10-25	LMBTS	6.3	6.3 score	>= 6.2 score	elective	elective	open heart	160	<240 min	#NULL!	#NULL!	no	closed and < 90 min	#NULL!	#NULL!
post	86	female	2011-03-05	2012-01-01	15	>= 5kg	108	DORV, severe PS, subaortic VSD, PDA with Rt side aortic arch	cyanosis	no	yes	Mosaic chromosome deletion	no	no	no	yes	yes	GDD	no	no	no	no		no		3	class 3-4	no	no	no		no		2019-04-24	LMBTS	6.3	6.3 score	>= 6.2 score	elective	elective	closed heart	205	<240 min	#NULL!	#NULL!	no	closed and < 90 min	#NULL!	#NULL!
post	108	male	2017-03-30	2017-03-30	9.8	>= 5kg	86	PA/VSD	cyanosis	no	no		no	no	no	no	no		no	no	no	yes	RMBTS	no		3	class 3-4	no	no	yes	ASA	no		2019-05-21	LMBTS	6.3	6.3 score	>= 6.2 score	elective	elective	closed heart	150	<240 min	#NULL!	#NULL!	no	closed and < 90 min	#NULL!	#NULL!
pre	190	female	2014-02-24	2014-10-24	16.6	>= 5kg	109	PA, VSD, small confluent PA, MAPCAS	cyanosis	no	no		no	no	no	no	no		no	no	no	no		no		2	class 1-2	no	no	no		no		2019-02-08	LMBTS	6.3	6.3 score	>= 6.2 score	urgency	emergency or urgency	closed heart	210	<240 min	#NULL!	#NULL!	no	closed and < 90 min	#NULL!	#NULL!
post	52	female	2015-07-04	2016-02-01	10.3	>= 5kg	92.5	TOF with severe RPA hypoplasia	cyanosis	no	yes	DiGeorge syndrome	no	yes	no	no	yes	thrombocytopenia,Vitamin D deficiency	no	no	no	no		no		3	class 3-4	no	no	no		no		2020-03-17	RMBTS	6.3	6.3 score	>= 6.2 score	elective	elective	closed heart	160	<240 min	#NULL!	#NULL!	no	closed and < 90 min	#NULL!	#NULL!
pre	45	male	2013-10-20	2014-06-25	11.5	>= 5kg	90	Right isomerism, common atrium common ventricle, PS, supracardiac TAPVR	cyanosis	yes	no		no	no	no	no	no		yes	no	no	yes	Central shunt 10.07.2014	no		2	class 1-2	no	no	no		no		2018-11-28	LMBTS	6.3	6.3 score	>= 6.2 score	elective	elective	open heart	260	>=240 min	#NULL!	#NULL!	no	closed and < 90 min	#NULL!	#NULL!
pre	75	female	2018-06-28	2018-07-21	5.3	>= 5kg	68	Right isomerism, common atrium common ventricle with mild PS, obstructed supracardiac TAPVR	cyanosis	yes	no		no	no	no	no	yes	FTT	yes	yes	no	no		no		3	class 3-4	no	yes	no		no		2019-03-15	TAPVR repair	9	other	>= 6.2 score	elective	elective	open heart	130	<240 min	56	< 85min	< 90min	closed and < 90 min	27	<60 min
pre	211	female	2019-02-11	2019-02-11	2.9	< 5 kg	51	PA/VSD., APC from LCCA to MPA	cyanosis	no	no		no	no	no	no	no		no	no	no	no		yes	clinical sepsis on ampi genta	3	class 3-4	yes	yes	yes	PGE1	no		2019-03-18	Melbourne shunt	6.3	6.3 score	>= 6.2 score	urgency	emergency or urgency	open heart	180	<240 min	37	< 85min	< 90min	closed and < 90 min	#NULL!	#NULL!
pre	200	female	2019-02-03	2019-02-03	2.34	< 5 kg	49	Common ventricle, PA	cyanosis	yes	no		no	no	no	no	no		yes	no	no	no		yes	clinical sepsis on cefotaxime amikin then PIP-TAZ	3	class 3-4	no	yes	yes	PGE1. PIP-TaZ	yes	PIP-TAZ	2019-02-21	LMBTS then central ECMO	6.3	6.3 score	>= 6.2 score	urgency	emergency or urgency	open heart	297	>=240 min	69	< 85min	< 90min	closed and < 90 min	#NULL!	#NULL!
pre	48	male	2007-08-18	#NULL!	25	>= 5kg	999	Right isomerism, common atrium common ventricle, TAPVR	cyanosis	yes	no		no	no	no	no	no		yes	yes	yes	yes	PDA ligation, BDG, repair TAPVR AV valve repair	yes	Stenotrophomonas pneumonia	3	class 3-4	no	yes	no		no		2019-01-10	AV machanical valve dysfunction s/p thrombectomy	7	other	>= 6.2 score	elective	elective	open heart	265	>=240 min	115	>=85 min	>=90 min	CBP time > 90 min	39	<60 min
pre	81	male	2019-01-15	#NULL!	3	< 5 kg	50	PA/VSD, confluent PA	cyanosis	no	no		no	no	no	no	yes	Anorectal malformation	no	no	no	no		no		2	class 1-2	no	yes	yes	PGE1	no		2019-01-24	RMBTS	6.3	6.3 score	>= 6.2 score	elective	elective	open heart	90	<240 min	#NULL!	#NULL!	no	closed and < 90 min	#NULL!	#NULL!
pre	54	male	2018-10-11	2018-10-11	3.2	< 5 kg	53	PA/IVS, bipartite RV, confluent PA	cyanosis	no	no		no	no	no	no	no		no	yes	no	no		yes		3	class 3-4	no	yes	yes	PGE1	no		2018-12-18	RMBTS	6.3	6.3 score	>= 6.2 score	elective	elective	open heart	160	<240 min	#NULL!	#NULL!	no	closed and < 90 min	#NULL!	#NULL!
post	262	female	2019-08-22	2019-08-27	3.9	< 5 kg	54	Right isomerism, dTGA, PA, complete AVSD	cyanosis	no	no		no	no	no	no	no		yes	no	no	no		yes	pneumonia	2	class 1-2	no	yes	no		no		2019-11-15	LMBTS,PDA ligation	6.3	6.3 score	>= 6.2 score	elective	elective	closed heart	133	<240 min	#NULL!	#NULL!	no	closed and < 90 min	#NULL!	#NULL!
pre	248	male	2017-06-14	2017-10-20	7.5	>= 5kg	77	ccTGA(S,L,L) 2.Ebstein's valve with severe left arioventricular valve regurgitation 3.secundum ASD	cyanosis	no	no		no	no	no	no	no		no	yes	no	no		no		3	class 3-4	no	no	yes	Lasix	no		2018-06-13	Systemic AV valve replacement with 21 mm Saint Jude Atrialized RV(left sided ventricle) plication (Danielson's technique)	11.5	other	>= 6.2 score	elective	elective	open heart	210	<240 min	111	>=85 min	>=90 min	CBP time > 90 min	88	>=60min
pre	101	female	2017-11-26	2017-11-27	4.7	< 5 kg	62	Perimembranous VSD with flap PFO with ASD with HOCM	acyanosis	no	yes	r/o noonan syndrome	no	no	no	yes	no		no	yes	no	no		no		3	class 3-4	no	no	yes	lasix,aldactone	no		2018-07-26	VSD closure and ASD closure	6	other	< 6.2 score	elective	elective	open heart	185	<240 min	86	>=85 min	< 90min	closed and < 90 min	55	<60 min
post	87	female	2019-02-08	2019-03-20	3.5	< 5 kg	999	Hypoplastic aortic arch with long segment juxtaductal CoA	acyanosis	no	no		no	no	no	no	yes	Cleft lip/cleft palate, MCDK	no	no	no	no		no		2	class 1-2	no	no	no		no		2019-04-26	Total repair, PDA ligation	6	other	< 6.2 score	elective	elective	open heart	185	<240 min	64	< 85min	< 90min	closed and < 90 min	55	<60 min
pre	1	male	2018-07-09	2018-07-09	3.3	< 5 kg	55	Perimembranous VSD	acyanosis	no	no		no	no	no	no	yes	Laryngomalacia	no	yes	no	no		no		2	class 1-2	no	no	no		no		2018-09-25	VSD closure with PDA ligation	6	other	< 6.2 score	elective	elective	open heart	145	<240 min	86	>=85 min	< 90min	closed and < 90 min	37	<60 min
post	191	male	2019-03-23	2019-09-16	5.3	>= 5kg	61	Large perimembranous VSD with severe MR with small ASD	acyanosis	no	yes	Down syndrome	yes	no	no	no	no		no	yes	no	no		no		3	class 3-4	no	no	no		no		2019-11-06	VSD closure,MV repair	6	other	< 6.2 score	elective	elective	open heart	150	<240 min	81	< 85min	< 90min	closed and < 90 min	61	>=60min
post	32	female	2019-10-28	2019-11-02	2.5	< 5 kg	48	UVH, DORV, MA, PS, restricted PFO	cyanosis	yes	no		no	no	no	no	no		no	yes	no	no		no		2	class 1-2	no	no	yes	lasix,aldactone,lanoxin	no		2019-12-02	Atrial septectomy with PAB	6	other	< 6.2 score	elective	elective	open heart	165	<240 min	84	< 85min	< 90min	closed and < 90 min	14	<60 min
post	21	female	2019-03-10	2019-06-20	4.4	< 5 kg	62.5	Large inlet extend to muscular VSD	acyanosis	no	no		no	no	no	no	no		no	yes	no	no		yes	pneumonia	3	class 3-4	no	no	yes	lasix,aldactone	yes	Cefotaxime	2019-08-23	VSD closure	6	other	< 6.2 score	elective	elective	open heart	120	<240 min	61	< 85min	< 90min	closed and < 90 min	36	<60 min
pre	242	male	2017-06-07	2018-01-04	6.3	>= 5kg	67	Large inlet VSD	acyanosis	no	yes	Down Syndrome	yes	no	no	no	no		no	yes	no	no		no		3	class 3-4	no	no	yes	HCTZ.aldactone	no		2018-06-02	VSD closure using gluteraldehyde-treated autologous pericardial patch	6	other	< 6.2 score	elective	elective	open heart	140	<240 min	49	< 85min	< 90min	closed and < 90 min	27	<60 min
post	84	male	2019-12-18	#NULL!	2.3	< 5 kg	46	Moderate perimembranous VSD	acyanosis	no	yes	Down syndrome	yes	no	no	no	yes	oromotor dysfunction, hypothyroid	no	yes	no	no		no		2	class 1-2	no	no	yes	lasix,aldactone,lanoxin	no		2020-01-31	VSD closure	6	other	< 6.2 score	elective	elective	open heart	135	<240 min	79	< 85min	< 90min	closed and < 90 min	45	<60 min
pre	64	male	2018-04-04	2018-08-18	5.1	>= 5kg	61	Large perimembranous VSD with moderate MR with pulmonary HT	acyanosis	no	no		no	no	no	no	yes	FTT	no	yes	yes	no		no		3	class 3-4	no	no	no		no		2019-01-04	VSD closure with MV repair	6	other	< 6.2 score	elective	elective	open heart	135	<240 min	84	< 85min	< 90min	closed and < 90 min	59	<60 min
post	189	male	2019-07-05	2019-07-06	3	< 5 kg	50	:arge inlet VSD with ASD secundum, bilateral SVC	acyanosis	no	yes	Down syndrome	yes	no	no	no	no		no	yes	yes	no		no		3	class 3-4	no	no	no		no		2019-11-05	VSD closuer with primary ASD closure	6	other	< 6.2 score	elective	elective	open heart	130	<240 min	85	>=85 min	< 90min	closed and < 90 min	63	>=60min
post	95	male	2019-02-04	#NULL!	3	< 5 kg	50	Perimembranous VSD, secundum ASD, tiny PDA	acyanosis	no	no		no	no	no	no	yes	omphalocele	no	yes	no	no		no		3	class 3-4	no	no	no		no		2019-05-07	VSD closure with primary closure of flap PFO with PDA ligation	6	other	< 6.2 score	elective	elective	open heart	130	<240 min	76	< 85min	< 90min	closed and < 90 min	10	<60 min
pre	62	female	2017-10-06	2017-10-06	4.6	< 5 kg	58	Perimembranous VSD, PDA, moderate TR	acyanosis	no	yes	Down syndrome	yes	no	no	no	yes	FTT	no	yes	yes	no		no		3	class 3-4	no	no	no		no		2019-01-05	VSD closure with TV repair	6	other	< 6.2 score	elective	elective	open heart	90	<240 min	55	< 85min	< 90min	closed and < 90 min	37	<60 min
pre	234	male	2017-08-05	#NULL!	7.7	>= 5kg	68.5	Large perimembranous VSD	acyanosis	no	no		no	no	no	no	yes	R/O Subglottic stenosis	no	yes	no	no		yes	Parainfluenza Pnenumonia	3	class 3-4	no	no	yes	Lasix,aldactone	no		2018-05-05	VSD Closure with gluteraldehyde-treated autologous pericardial patch	6	other	< 6.2 score	elective	elective	open heart	105	<240 min	59	< 85min	< 90min	closed and < 90 min	37	<60 min
pre	49	female	2017-10-10	2017-10-10	6.3	>= 5kg	76	VSD, PDA	acyanosis	no	yes	Down syndrome	yes	no	no	no	yes	FTT	no	yes	yes	no		no		3	class 3-4	no	no	no		no		2018-12-04	PDA ligation, VSD closure	6	other	< 6.2 score	elective	elective	open heart	165	<240 min	71	< 85min	< 90min	closed and < 90 min	42	<60 min
post	16	male	2018-04-20	2019-05-03	10	>= 5kg	81	pulmonary sling with tracheal stenosis	acyanosis	no	no		no	no	no	no	no		no	no	no	no		no		2	class 1-2	no	no	no		yes	meropenem	2019-07-19	LPA relocation	6	other	< 6.2 score	elective	elective	open heart	105	<240 min	55	< 85min	< 90min	closed and < 90 min	4	<60 min
post	153	male	2019-08-01	#NULL!	2.9	< 5 kg	48	TAPVR (supracardiac, coronary sinus type)	cyanosis	no	no		no	no	no	no	no		no	yes	no	no		yes	pneumonia	2	class 1-2	no	no	no		yes	Ampicillin cefotaxime	2019-08-09	Unroof coronary sinus with ASD patch closure	3	other	< 6.2 score	elective	elective	open heart	115	<240 min	61	< 85min	< 90min	closed and < 90 min	32	<60 min
pre	67	male	2017-09-25	2018-11-28	8	>= 5kg	75	Transitional AVSD	acyanosis	no	no		no	no	no	no	yes	FTT	no	yes	yes	no		no		3	class 3-4	no	no	no		no		2019-02-11	Total repair	5	other	< 6.2 score	elective	elective	open heart	210	<240 min	133	>=85 min	>=90 min	CBP time > 90 min	104	>=60min
pre	46	male	2018-08-16	2018-09-02	3.5	< 5 kg	55	Perimembranous VSD, small PFO	acyanosis	no	no		no	no	no	no	no		no	yes	no	no		yes		2	class 1-2	no	no	no		no		2018-12-01	VSD closure	6	other	< 6.2 score	elective	elective	open heart	180	<240 min	92	>=85 min	>=90 min	CBP time > 90 min	49	<60 min
post	23	female	2019-05-31	2019-06-03	3.85	< 5 kg	56	Large perimembranous VSD	acyanosis	no	no		no	no	no	no	yes	oromotor dysfunction	no	yes	yes	no		no		3	class 3-4	no	no	yes	lasix,aldactone,lanoxin	no		2019-09-16	VSD closure	6	other	< 6.2 score	elective	elective	open heart	140	<240 min	90	>=85 min	>=90 min	CBP time > 90 min	69	>=60min
pre	77	male	2019-01-29	#NULL!	2.8	< 5 kg	49	DORV subaortic VSD with PDA	cyanosis	no	no		no	no	no	no	yes	Oromotor dysfunction	no	yes	no	no		no		2	class 1-2	no	no	no		no		2019-03-22	VSD closure with PDA ligation	6	other	< 6.2 score	elective	elective	open heart	170	<240 min	120	>=85 min	>=90 min	CBP time > 90 min	79	>=60min
pre	73	male	2018-12-17	2018-12-17	4	< 5 kg	59	Large VSD	acyanosis	no	no		no	no	no	no	no		no	yes	no	no		no		2	class 1-2	no	no	no		no		2019-01-25	VSD closure	6	other	< 6.2 score	elective	elective	open heart	175	<240 min	110	>=85 min	>=90 min	CBP time > 90 min	62	>=60min
pre	53	female	2018-02-08	2018-05-01	5.6	>= 5kg	69	Perimembranous VSD with subvalvular PS	acyanosis	no	no		no	no	no	no	yes	FTT	no	yes	no	no		no		3	class 3-4	no	no	no		no		2018-12-14	Total repair	6	other	< 6.2 score	elective	elective	open heart	145	<240 min	94	>=85 min	>=90 min	CBP time > 90 min	62	>=60min
post	94	female	2016-05-24	2018-11-02	7.7	>= 5kg	79	Perimembranous VSD, moderate sized PDA	acyanosis	no	yes	Down syndrome	yes	no	no	no	yes	Imperforated anus, thalassemia	no	yes	yes	no		yes	pneumonia	3	class 3-4	no	no	no		no		2019-05-07	VSD closure	6	other	< 6.2 score	elective	elective	open heart	150	<240 min	95	>=85 min	>=90 min	CBP time > 90 min	70	>=60min
post	114	female	2019-03-01	2019-04-21	3.4	< 5 kg	55	CoA,VSD,PFO,PDA	acyanosis	no	no		no	no	no	no	no		no	yes	no	no		yes	neonatal sepsis	4	class 3-4	no	no	no		yes	PIP/TAZ	2019-05-31	Total repair	6	other	< 6.2 score	elective	elective	open heart	210	<240 min	104	>=85 min	>=90 min	CBP time > 90 min	102	>=60min
post	61	female	2017-01-18	2017-09-27	6.3	>= 5kg	72	Intermidiate AVSD with PAH	acyanosis	no	no		no	no	no	no	no		no	no	yes	no		no		3	class 3-4	no	no	yes	lasix,aldactone	no		2019-04-10	Total repair	5	other	< 6.2 score	elective	elective	open heart	165	<240 min	101	>=85 min	>=90 min	CBP time > 90 min	73	>=60min
post	146	female	2018-10-06	2019-02-01	5.1	>= 5kg	62	VSD, moderate tto severe TR, PFO with CoA	acyanosis	no	no		no	no	no	no	no		no	yes	no	no		no		3	class 3-4	no	no	yes	aldactone	no		2019-07-30	Total repair	6	other	< 6.2 score	elective	elective	open heart	370	>=240 min	186	>=85 min	>=90 min	CBP time > 90 min	122	>=60min
post	256	male	2011-04-12	2013-05-01	14.5	>= 5kg	106	Dysplastic TV, severe TR	acyanosis	no	no		no	no	no	no	no		no	yes	no	no		no		2	class 1-2	no	no	yes	lasix,aldactone	no		2019-08-09	TV annuplasty, ASD closure with central VA ecmo	6	other	< 6.2 score	elective	elective	open heart	285	>=240 min	125	>=85 min	>=90 min	CBP time > 90 min	49	<60 min
post	35	female	2019-04-23	#NULL!	5.3	>= 5kg	51	Large perimembranous VSD, small ASD with cortriatriatum sinester	acyanosis	no	yes	Down syndrome	yes	no	no	no	no		no	no	no	no		no		3	class 3-4	no	no	yes	lasix,aldactone	no		2019-12-14	Total repair	6	other	< 6.2 score	elective	elective	open heart	265	>=240 min	197	>=85 min	>=90 min	CBP time > 90 min	163	>=60min
post	192	female	2009-01-26	2012-07-02	21.8	>= 5kg	131	Moderate sized Pm VSD, prolapsed RCC, severe MR, severe AR with LV to RA shunt	acyanosis	no	no		no	no	no	no	no		no	yes	no	no		no		2	class 1-2	no	no	yes	atenolol	no		2019-11-08	VSD closure, MV repair	6	other	< 6.2 score	elective	elective	open heart	404	>=240 min	301	>=85 min	>=90 min	CBP time > 90 min	225	>=60min
pre	89	male	2018-08-12	2018-10-21	5.6	>= 5kg	63	UVH, VSD, TGA	cyanosis	yes	no		no	no	no	no	yes	FTT	no	yes	no	yes	PA banding, balloon atrial septostomy	no		2	class 1-2	no	no	no		no		2019-02-22	Re-banding of MCA	6	other	< 6.2 score	elective	elective	open heart	100	<240 min	#NULL!	#NULL!	no	closed and < 90 min	#NULL!	#NULL!
post	18	male	2019-07-24	2019-08-05	2.6	< 5 kg	46	UVH with unprotective lung, mild to moderate AVVR	cyanosis	yes	no		no	no	no	no	no		no	yes	no	no		no		2	class 1-2	no	no	yes	lasix,aldactone	no		2019-08-16	PA banding	6	other	< 6.2 score	elective	elective	closed heart	35	<240 min	#NULL!	#NULL!	no	closed and < 90 min	#NULL!	#NULL!
pre	65	male	2018-11-06	2018-11-06	3	< 5 kg	53	UVH, supracardiac TAPVR to RSVC with unprotect lung	cyanosis	yes	no		no	no	no	no	no		no	yes	no	no		yes	Pneumonia	3	class 3-4	no	no	no		no		2019-02-05	PA banding	6	other	< 6.2 score	elective	elective	open heart	75	<240 min	#NULL!	#NULL!	no	closed and < 90 min	#NULL!	#NULL!
post	259	female	2018-06-28	2018-07-21	6.1	>= 5kg	70	Right isomerism, CACV, PS, TAPVR s/p TAPVR repair	cyanosis	yes	no		no	no	no	no	no		yes	yes	yes	yes		no		3	class 3-4	no	no	no		no		2019-10-11	Redo-PA banding	6	other	< 6.2 score	elective	elective	closed heart	70	<240 min	#NULL!	#NULL!	no	closed and < 90 min	#NULL!	#NULL!
post	13	female	2019-04-12	2019-04-12	3.9	< 5 kg	54	UVH unprotective lung, RAVV atresia, complete heart block	cyanosis	yes	yes	DiGeorge syndrome	no	yes	no	no	no		no	no	no	no		no		2	class 1-2	no	no	yes	lasix,aldactone	no		2019-07-05	PA banding, atrial and ventrile epicardial lead placement	6	other	< 6.2 score	elective	elective	closed heart	155	<240 min	#NULL!	#NULL!	no	closed and < 90 min	#NULL!	#NULL!
post	142	female	2019-07-08	2019-07-09	3.2	< 5 kg	50	Truncus arteriosus type II with complete AVSD, Rastelli type C	cyanosis	no	yes	CHAEGE syndrome	no	no	yes	no	yes	T cell defect, hypoparathyroid, oromotor dysfunction	no	yes	no	no		yes	pneumonia	3	class 3-4	yes	yes	no		no		2019-07-25	Bilateral PA banding with CPB support	6	other	< 6.2 score	elective	elective	open heart	110	<240 min	43	< 85min	< 90min	closed and < 90 min	#NULL!	#NULL!
post	72	male	2020-02-06	2020-02-08	3	< 5 kg	53	DORV subaortic VSD, small LV, severe MS, hypoplastic arch with severe CoA	cyanosis	no	no		no	no	no	no	yes	acute symptomatic seizure from HIE	no	yes	no	no		no		4	class 3-4	no	yes	yes	PGE1	no		2020-03-12	PAB, arch reconstruction and PDA division	6	other	< 6.2 score	elective	elective	open heart	210	<240 min	93	>=85 min	>=90 min	CBP time > 90 min	42	<60 min
post	119	female	2019-04-16	2019-05-31	3.3	< 5 kg	51	Post ductal CoA with hypoplastic aortic arch	acyanosis	no	no		no	no	no	no	no		no	yes	no	no		yes		3	class 3-4	no	yes	no		no		2019-06-18	Coarctectomy	6	other	< 6.2 score	elective	elective	open heart	180	<240 min	92	>=85 min	>=90 min	CBP time > 90 min	32	<60 min
post	22	male	2019-07-29	2019-07-30	2.9	< 5 kg	999	DORV subaortic VSD	cyanosis	no	no		no	no	no	no	no		no	yes	no	no		yes	pneumonia	4	class 3-4	yes	yes	no		yes	meropenem	2019-08-30	PA banding	6	other	< 6.2 score	elective	elective	closed heart	70	<240 min	#NULL!	#NULL!	no	closed and < 90 min	#NULL!	#NULL!
pre	90	female	2019-02-01	#NULL!	3.3	< 5 kg	50	TA with VSD with non-restrictive VSD with PDA	cyanosis	no	no		no	no	no	no	no		no	yes	no	no		yes	NEC IIC	3	class 3-4	no	yes	yes	lasix	yes	meropenem	2019-02-15	PA banding with PDA ligation	6	other	< 6.2 score	elective	elective	open heart	73	<240 min	#NULL!	#NULL!	no	closed and < 90 min	#NULL!	#NULL!
pre	10	male	2018-08-26	2018-09-01	3.5	< 5 kg	53	dTGA	cyanosis	no	no		no	no	no	no	no		no	no	no	no		no		4	class 3-4	yes	yes	yes	PGE1	yes	Cefotaxime	2018-09-03	Balloon atrial septostomy	5	other	< 6.2 score	emergency	emergency or urgency	open heart	100	<240 min	#NULL!	#NULL!	no	closed and < 90 min	#NULL!	#NULL!
pre	150	female	2017-09-05	2018-09-26	6.9	>= 5kg	75	PDA, pneumonia	acyanosis	no	no		no	no	no	no	no		no	yes	yes	no		yes	P auruginosa then Stenotrophomonas pneumonia 9, 10.2018	4	class 3-4	yes	yes	yes	milrinon, lasix, aldactone, Pip-Tazo	yes	PIP/TAZ	2018-11-07	PDA ligation	3	other	< 6.2 score	urgency	emergency or urgency	closed heart	90	<240 min	#NULL!	#NULL!	no	closed and < 90 min	#NULL!	#NULL!
pre	11	female	2017-08-16	2017-08-21	17.8	>= 5kg	120	PA/IVS,tripatite RV	cyanosis	no	no		no	no	no	no	no		no	no	no	yes	RBMTS 04.09.2017	no		2	class 1-2	no	no	no		no		2018-09-17	BDG	7	other	>= 6.2 score	elective	elective	open heart	170	<240 min	59	< 85min	< 90min	closed and < 90 min	#NULL!	#NULL!
post	39	female	2014-03-26	2014-03-26	17	>= 5kg	100	TA,NRGV,VSD, severe subvalvular PS s/p RMBTS	cyanosis	no	no		no	no	no	no	no		no	no	no	yes	RMBTS 22.07.2015	no		3	class 3-4	no	no	no		no		2020-01-07	bidirectional Glenn shunt and azygous vein ligation	7	other	>= 6.2 score	elective	elective	open heart	195	<240 min	69	< 85min	< 90min	closed and < 90 min	#NULL!	#NULL!
post	254	male	2018-08-12	2018-10-21	7.5	>= 5kg	69	UVH,DILV,no PS,d-TGA relationship,restricted ASD s/p BAS	cyanosis	yes	no		no	no	no	no	no		no	yes	no	yes	PA banding 26.11.2018	no		3	class 3-4	no	no	no		no		2019-07-12	Bidirectional Glenn operation with PA ligation with atrial septostomy	7	other	>= 6.2 score	elective	elective	open heart	205	<240 min	89	>=85 min	< 90min	closed and < 90 min	9	<60 min
pre	274	male	2009-09-23	2010-08-05	16	>= 5kg	114	UVH s/p PAB, interatrial septostomy, BDG and severe AVVR	cyanosis	yes	no		no	no	no	no	no		no	yes	yes	yes	BDG 06.06.2011	no		2	class 1-2	no	no	yes	Captopril,sidenafil	no		2018-06-01	AVVR	7	other	>= 6.2 score	elective	elective	open heart	165	<240 min	80	< 85min	< 90min	closed and < 90 min	40	<60 min
post	5	female	2019-05-23	#NULL!	3.3	< 5 kg	53	Rt side aortic arch with severe CoA with PDA suspected absent Lt sublavian artery	acyanosis	no	no		no	no	no	no	yes	multiple anomaly	no	no	no	no		no		4	class 3-4	no	no	yes	PGE1	no		2019-06-07	Arch reconstruction	7	other	>= 6.2 score	elective	elective	open heart	145	<240 min	67	< 85min	< 90min	closed and < 90 min	42	<60 min
post	3	male	2018-09-06	2018-09-06	5.8	>= 5kg	63	HLHS	cyanosis	no	no		no	no	no	no	no		no	no	no	yes	modified norwood operation with RMBTS 18.09.2018	no		2	class 1-2	no	no	yes	lasix,aldactone	no		2019-06-04	Redo-bidirectional Glenn shunt with RMBTS takedown	7	other	>= 6.2 score	elective	elective	open heart	180	<240 min	82	< 85min	< 90min	closed and < 90 min	#NULL!	#NULL!
post	255	male	2018-09-06	#NULL!	5.8	>= 5kg	63	HLHS s/p modified norwood operation with RMBTS	cyanosis	no	no		no	no	no	no	no		no	yes	no	yes	RMBTS	no		3	class 3-4	no	no	no		no		2019-06-04	Redo-bidirectional Glenn shunt with RMBTS takedown	7	other	>= 6.2 score	elective	elective	open heart	180	<240 min	82	< 85min	< 90min	closed and < 90 min	#NULL!	#NULL!
post	34	male	2017-02-25	2017-02-27	12.8	>= 5kg	69	Severe subvalvular PS, PDA	acyanosis	no	yes	R/O william syndrome	no	no	no	yes	yes	GDD	no	yes	no	yes	PBAV 09.08.2017, PDA device closure 24.10.2018	no		3	class 3-4	no	no	yes	lasix,aldactone,propanolol	no		2019-12-13	AoV repair with resection of subvalvular fibrous tissue and septal myectomy	7	other	>= 6.2 score	elective	elective	open heart	105	<240 min	57	< 85min	< 90min	closed and < 90 min	33	<60 min
pre	229	male	2014-10-26	#NULL!	12.6	>= 5kg	99	UVH dextrocardia Rt isomerism severe PS s/P LMBTs and divided azygos vein	cyanosis	yes	no		no	no	no	no	no		yes	yes	no	yes	RMBTS 04.11.2016	no		2	class 1-2	no	no	no		no		2018-04-27	BDG, Division of LMBTs PA plasty with gluteraldehyde treated pericardial patch	7	other	>= 6.2 score	elective	elective	open heart	100	<240 min	65	< 85min	< 90min	closed and < 90 min	#NULL!	#NULL!
post	17	female	2018-09-21	2018-10-01	6	>= 5kg	67	DORV subaortic VSD, mildly hypoplastic LV, severe MV	cyanosis	no	no		no	no	no	no	no		no	no	yes	no		no		2	class 1-2	no	no	yes	lasix,aldactone	no		2019-08-16	mitral valve resection, VSD closure, ASD correction	7	other	>= 6.2 score	elective	elective	open heart	100	<240 min	58	< 85min	< 90min	closed and < 90 min	722	>=60min
pre	61	male	2017-01-29	2017-04-01	8.2	>= 5kg	79	Heterotaxy unbalanced AV canal, TAPVR	acyanosis	yes	no		no	no	no	no	no		yes	yes	no	yes	TAPVR repair and PA banding 18.08.2017	no		2	class 1-2	no	no	no		no		2018-12-28	BDG	7	other	>= 6.2 score	elective	elective	open heart	120	<240 min	50	< 85min	< 90min	closed and < 90 min	#NULL!	#NULL!
pre	120	female	2018-08-18	#NULL!	4.2	< 5 kg	51	Cotritriatum dexter with PDA with ASD secundum	acyanosis	no	no		no	no	no	no	no		no	yes	no	no		no		3	class 3-4	no	no	no		no		2018-08-28	Repair cotritriatum with PDA ligation with direct ASD closure	6.8	other	>= 6.2 score	elective	elective	open heart	120	<240 min	50	< 85min	< 90min	closed and < 90 min	21	<60 min
pre	272	male	2018-03-06	2018-03-08	3	< 5 kg	51	PA with VSD MAPCA with small PDA	cyanosis	no	no		no	no	no	no	no		no	no	no	no		no		3	class 3-4	no	no	no		no		2018-05-23	RMBTS	6.3	6.3 score	>= 6.2 score	elective	elective	open heart	180	<240 min	65	< 85min	< 90min	closed and < 90 min	18	<60 min
post	140	male	2018-07-02	#NULL!	3.2	< 5 kg	52	UVH with severe PS, LAVV atresia with mild Rt AVVR with restrict ASD s/p BAS with cyanotic spell	cyanosis	yes	no		no	no	no	no	no		no	yes	no	no		no		4	class 3-4	no	no	no		no		2019-07-18	LMBTS	6.3	6.3 score	>= 6.2 score	emergency	emergency or urgency	open heart	150	<240 min	69	< 85min	< 90min	closed and < 90 min	#NULL!	#NULL!
pre	283	male	2014-05-28	2014-10-21	12	>= 5kg	100	Tausssing Bing syndrome, PAH, hypoplastic arch, small PDA	acyanosis	no	no		no	no	no	no	no		no	no	yes	no		no		3	class 3-4	no	no	no		no		2018-07-06	Atrial switch with PDA ligation	10	other	>= 6.2 score	elective	elective	open heart	150	<240 min	91	>=85 min	>=90 min	CBP time > 90 min	54	<60 min
pre	273	male	2012-09-29	2013-01-03	10.5	>= 5kg	97	DORV with subaortic VSD	cyanosis	no	no		no	no	no	no	no		no	yes	no	no		no		3	class 3-4	no	no	yes	Lasix,aldactone,lanoxin	no		2018-05-28	Total repair	7	other	>= 6.2 score	elective	elective	open heart	230	<240 min	135	>=85 min	>=90 min	CBP time > 90 min	96	>=60min
pre	173	male	2018-10-24	2018-11-20	3.35	< 5 kg	54	Truncus arteriosus type I, Perimembranous VSD, ASD secondum	cyanosis	no	yes	DiGeorge syndrome	no	yes	no	no	no		no	yes	yes	no		no		2	class 1-2	no	no	yes	lasix, aldactone	no		2019-01-09	Total repair truncus using 12 mm contegra	11	other	>= 6.2 score	urgency	emergency or urgency	open heart	190	<240 min	118	>=85 min	>=90 min	CBP time > 90 min	79	>=60min
post	49	male	2018-09-27	#NULL!	5	>= 5kg	66	Truncus arteriosus type II with PAH	cyanosis	no	no		no	no	no	no	no		no	yes	yes	no		yes	pneumoia, candidiamia, Rota diarrhea	3	class 3-4	no	no	yes	lasix,captopril,carvedilol	yes	PIP/TAZ	2020-02-20	Total repair	11	other	>= 6.2 score	elective	elective	open heart	225	<240 min	155	>=85 min	>=90 min	CBP time > 90 min	107	>=60min
pre	51	female	2018-08-17	2018-11-23	3.1	< 5 kg	57	Complete AVSD type A	acyanosis	no	no		no	no	no	no	yes	FTT	no	yes	no	no		yes	MSSA pneumonia, Pseudomonas UTI, MRCNS CLABSI	3	class 3-4	no	no	no		yes	PIP/TAZ	2019-01-09	Total repair	9	other	>= 6.2 score	elective	elective	open heart	210	<240 min	149	>=85 min	>=90 min	CBP time > 90 min	87	>=60min
post	55	female	2019-04-14	2019-04-14	5.9	>= 5kg	63	complete AVSD type A, 2ASD	acyanosis	no	yes	Down syndrome	yes	no	no	no	yes	pulmonary HT, hypothyroid	no	yes	yes	no		no		3	class 3-4	no	no	yes	lasix	no		2020-03-04	Total repair	9	other	>= 6.2 score	elective	elective	open heart	180	<240 min	128	>=85 min	>=90 min	CBP time > 90 min	101	>=60min
pre	286	female	2018-03-29	#NULL!	3.2	< 5 kg	999	CACV with PA with TAPVR infracardiac type	cyanosis	yes	no		no	no	no	no	no		yes	yes	no	no		yes	Early neonatal sepsis	3	class 3-4	no	no	no		no		2018-04-20	Total repaired of TAPVR, LMBTS, PDA ligation	9	other	>= 6.2 score	elective	elective	open heart	190	<240 min	132	>=85 min	>=90 min	CBP time > 90 min	45	<60 min
pre	66	female	2018-02-08	2018-02-08	7.4	>= 5kg	73	TOF with severe subvalvular and valvular PS	cyanosis	no	no		no	no	no	no	no		no	no	no	no		no		3	class 3-4	no	no	no		no		2019-02-01	Total repair	8	other	>= 6.2 score	elective	elective	open heart	210	<240 min	104	>=85 min	>=90 min	CBP time > 90 min	93	>=60min
pre	119	female	2016-09-07	2016-09-07	8	>= 5kg	78	TOF with mild LPA stenosis, small PDA	cyanosis	no	no		no	no	no	no	no		no	no	no	no		no		2	class 1-2	no	no	yes	propanolol	no		2018-08-31	Total repair	8	other	>= 6.2 score	elective	elective	open heart	185	<240 min	125	>=85 min	>=90 min	CBP time > 90 min	95	>=60min
pre	16	female	2018-05-30	2018-05-30	4.4	< 5 kg	59	DORV subaortic type, mild PS, PDA, ASD	cyanosis	no	no		no	no	no	no	yes	Ambiguous genitalia, BPD, Absent thymus with T cell defect	no	yes	no	no		yes	Pneumonia	3	class 3-4	no	no	no		yes	Meropenem	2018-10-11	Total repair	7	other	>= 6.2 score	elective	elective	open heart	190	<240 min	120	>=85 min	>=90 min	CBP time > 90 min	90	>=60min
post	174	female	2019-09-01	2019-09-01	2.39	< 5 kg	47	TOF with collateral vessel from aorta to LPA	cyanosis	no	no		no	no	no	no	no		no	no	no	no		yes	neonatal sepsis	3	class 3-4	no	no	no		no		2019-09-16	LMBTS	6.8	other	>= 6.2 score	elective	elective	open heart	210	<240 min	99	>=85 min	>=90 min	CBP time > 90 min	#NULL!	#NULL!
post	212	female	2019-10-04	2019-10-28	2.95	< 5 kg	49	Truncus arteriosus type I	cyanosis	no	yes	DiGeorge syndrome	no	yes	no	no	no		no	yes	no	no		yes	neonatal sepsis	2	class 1-2	no	no	no		no		2019-12-12	Repair truncus arteriosus with VSD closure	11	other	>= 6.2 score	elective	elective	open heart	170	<240 min	109	>=85 min	>=90 min	CBP time > 90 min	76	>=60min
post	224	male	2019-11-03	#NULL!	3.7	< 5 kg	52	Truncus arteriosus type I with bileaflet valve with VSD with ASD secundum	cyanosis	no	no		no	no	no	no	no		no	yes	no	no		no		3	class 3-4	no	no	no		no		2020-01-09	repair of truncus arteriosus with VSD closure	11	other	>= 6.2 score	elective	elective	open heart	205	<240 min	133	>=85 min	>=90 min	CBP time > 90 min	83	>=60min
post	134	female	2013-01-02	2013-01-02	17.2	>= 5kg	108	Ebstein anomaly with moderate TR, secundum ASD with PFO	cyanosis	no	no		no	no	no	no	no		no	no	no	no		no		1	class 1-2	no	no	no		no		2019-07-02	TV relocation, ASD and PFO closure, cryoablation	10	other	>= 6.2 score	elective	elective	open heart	210	<240 min	111	>=85 min	>=90 min	CBP time > 90 min	86	>=60min
post	201	female	2019-10-22	#NULL!	2.4	< 5 kg	48	Rt isomerism CACV with TAPVR (infracardiac type) with hypoplastic arch	cyanosis	yes	no		no	no	no	no	no		yes	yes	no	no		no		3	class 3-4	no	no	yes	lasix	no		2019-11-25	Repair TAPVR with hypoplastic arch repair with PA banding	9	other	>= 6.2 score	elective	elective	open heart	205	<240 min	96	>=85 min	>=90 min	CBP time > 90 min	39	<60 min
post	115	female	2018-09-29	#NULL!	4.8	< 5 kg	60	Complete AVSD Rastelli type A, PHT	acyanosis	no	no		no	no	no	no	no		no	yes	yes	no		no		3	class 3-4	no	no	yes	lasix,lanoxin	no		2019-06-14	Total repair	9	other	>= 6.2 score	elective	elective	open heart	190	<240 min	96	>=85 min	>=90 min	CBP time > 90 min	68	>=60min
pre	41	female	2017-12-24	2017-12-24	6.5	>= 5kg	60	Complete AVSD type A	acyanosis	no	yes	Down syndrome	yes	no	no	no	yes	Hypothyroid	no	no	no	no		no		2	class 1-2	no	no	no		no		2018-11-23	Total repair	9	other	>= 6.2 score	elective	elective	open heart	195	<240 min	123	>=85 min	>=90 min	CBP time > 90 min	99	>=60min
post	218	female	2019-06-06	2019-09-11	4.8	< 5 kg	65	Complete AVSD with PDA	acyanosis	no	no		no	no	no	no	no		no	no	no	no		no		3	class 3-4	no	no	no		no		2019-12-27	complete AVSD repair	9	other	>= 6.2 score	elective	elective	open heart	165	<240 min	107	>=85 min	>=90 min	CBP time > 90 min	84	>=60min
pre	85	male	2017-07-27	2017-07-27	7	>= 5kg	70	Complete AVSD type A, PHT	acyanosis	no	yes	Down syndrome	yes	no	no	no	yes	Hypothyroid	no	yes	yes	no		no		3	class 3-4	no	no	no		no		2019-03-08	AVSD repair	9	other	>= 6.2 score	elective	elective	open heart	205	<240 min	121	>=85 min	>=90 min	CBP time > 90 min	96	>=60min
post	99	male	2018-11-12	2018-11-12	4.4	< 5 kg	64	Complete AVSD Rastelli type A, mild RAVVR and LAVVR, large ASD, moderate VSD	acyanosis	no	no		no	no	no	no	no		no	yes	no	no		no		3	class 3-4	no	no	yes	aldactone	no		2019-05-10	Total repair	9	other	>= 6.2 score	elective	elective	open heart	170	<240 min	99	>=85 min	>=90 min	CBP time > 90 min	71	>=60min
post	36	male	2013-05-31	2013-06-03	28.2	>= 5kg	120.5	Rt isomerism with UVH s/p MBTS with PA plasty with Glenn	cyanosis	yes	no		no	no	no	no	yes	Asthma,AR,GDD	yes	no	no	yes	MBTS with Glenn 2559	no		2	class 1-2	no	no	yes	captopril	no		2019-12-06	Extracardiac fontan	9	other	>= 6.2 score	elective	elective	open heart	213	<240 min	131	>=85 min	>=90 min	CBP time > 90 min	#NULL!	#NULL!
pre	23	female	2009-06-03	2009-06-03	13.5	>= 5kg	105	Complete AVSD	acyanosis	no	yes	Down syndrome	yes	no	no	no	no		no	no	no	yes	PDA clipping	no		2	class 1-2	no	no	no		no		2018-10-12	Total repair	9	other	>= 6.2 score	elective	elective	open heart	200	<240 min	116	>=85 min	>=90 min	CBP time > 90 min	87	>=60min
pre	59	female	2011-02-22	2011-06-14	22	>= 5kg	123	UVH, DILV,severe valvular and subvalvilar PS	cyanosis	yes	no		no	no	no	no	no		no	no	no	yes	BDG 12.02.2014	no		1	class 1-2	no	no	no		no		2018-12-25	Completion of extracardiac fontan	9	other	>= 6.2 score	elective	elective	open heart	235	<240 min	98	>=85 min	>=90 min	CBP time > 90 min	#NULL!	#NULL!
pre	277	male	2010-07-28	#NULL!	23.5	>= 5kg	117.5	Dextrocardia, mesocardia,common atrail, common ventricle, proxima; RPA stenosis	cyanosis	yes	no		no	no	no	no	no		no	no	no	yes	BDG 23.01.2012	no		2	class 1-2	no	no	no		no		2018-06-18	Extracardiac fontan, Rt and Lt pulmonary arterioplasty	9	other	>= 6.2 score	elective	elective	open heart	210	<240 min	160	>=85 min	>=90 min	CBP time > 90 min	66	>=60min
post	138	female	2016-04-07	2016-11-07	11.5	>= 5kg	97	TOF with subvalvular PS	cyanosis	no	no		no	no	no	no	no		no	no	no	no		no		1	class 1-2	no	no	yes	propanolol	no		2019-07-12	Total repair	8	other	>= 6.2 score	elective	elective	open heart	222	<240 min	154	>=85 min	>=90 min	CBP time > 90 min	108	>=60min
post	127	male	2018-08-26	2018-08-26	6.1	>= 5kg	69	TOF with mild subvalvular and valvular PS	cyanosis	no	no		no	no	no	no	no		no	no	no	no		no		3	class 3-4	no	no	no		no		2019-06-28	Total repair	8	other	>= 6.2 score	elective	elective	open heart	175	<240 min	101	>=85 min	>=90 min	CBP time > 90 min	73	>=60min
post	42	male	2018-11-24	2018-11-24	8.9	>= 5kg	77	TOF	cyanosis	no	no		no	no	no	no	no		no	no	no	no		no		3	class 3-4	no	no	no		no		2020-01-16	Transannular patch repair	8	other	>= 6.2 score	elective	elective	open heart	170	<240 min	110	>=85 min	>=90 min	CBP time > 90 min	88	>=60min
pre	179	male	2017-10-20	2018-07-20	8.5	>= 5kg	75	UVH, PS, small RPA	cyanosis	yes	no		no	no	no	no	no		no	no	no	no		no		2	class 1-2	no	no	yes	propanolol	no		2019-01-14	BDG, RPA plasty	7.5	other	>= 6.2 score	elective	elective	open heart	180	<240 min	115	>=85 min	>=90 min	CBP time > 90 min	76	>=60min
post	4	female	2018-01-22	#NULL!	8.5	>= 5kg	74	congenital MR with severe MR with CHF	acyanosis	no	no		no	no	no	no	yes	IDA	no	yes	yes	no		no		4	class 3-4	yes	no	no		yes	PIP/TAZ	2019-06-14	MV repair with MV annuplasty	7.5	other	>= 6.2 score	elective	elective	open heart	210	<240 min	135	>=85 min	>=90 min	CBP time > 90 min	93	>=60min
post	110	female	2016-05-24	2016-05-24	12	>= 5kg	90	UVH, Rt ismerism unbalance AVSD, subvalvular PS, TAPVR	cyanosis	yes	no		no	no	no	no	no		yes	yes	no	yes	partial repair TAPVR and RMBTS 16.11.2017	no		2	class 1-2	no	no	no		no		2019-05-24	Redo repair PAPVR and Glenn operation	7	other	>= 6.2 score	elective	elective	open heart	215	<240 min	165	>=85 min	>=90 min	CBP time > 90 min	57	<60 min
pre	19	male	2008-01-25	2008-01-25	41.7	>= 5kg	150	UVH	cyanosis	yes	no		no	no	no	no	no		no	no	no	no		no		2	class 1-2	no	no	no		no		2018-09-28	Bidirectional Gelnn	7	other	>= 6.2 score	elective	elective	open heart	215	<240 min	102	>=85 min	>=90 min	CBP time > 90 min	#NULL!	#NULL!
pre	79	male	2015-07-23	2015-08-04	12.2	>= 5kg	96	TA, dTGA, restricted ASD/VSD	cyanosis	no	no		no	no	no	no	yes	Ruptured Left MCA aneurysm s/p craniotomy with clot removal with clip aneurysm	no	yes	no	yes	PA banding 13.08.2015, Redo BAS 29.02.2016	no		2	class 1-2	no	no	no		no		2019-03-25	BDG with DKS with atrial septectomy	9.5	other	>= 6.2 score	elective	elective	open heart	300	>=240 min	180	>=85 min	>=90 min	CBP time > 90 min	75	>=60min
pre	232	male	2017-12-17	2017-12-17	5.1	>= 5kg	60	Complete AVSD (Rastell type C)	acyanosis	no	yes	Down Syndrome	yes	no	no	no	yes	Hypothyroidism	no	yes	yes	no		no		3	class 3-4	no	no	yes	Lasix	no		2018-05-03	Total repair	9	other	>= 6.2 score	elective	elective	open heart	240	>=240 min	154	>=85 min	>=90 min	CBP time > 90 min	123	>=60min
pre	58	male	2012-07-04	2012-07-04	15.5	>= 5kg	118	Truncus, ASD, Hypoplastic RV, severe PS	cyanosis	no	no		no	no	no	no	no		no	no	no	yes	BDG, MPA ligation 29.11.2015	no		2	class 1-2	no	no	no		no		2018-12-24	Extrafontan operation	9	other	>= 6.2 score	elective	elective	open heart	360	>=240 min	255	>=85 min	>=90 min	CBP time > 90 min	#NULL!	#NULL!
post	63	male	2018-05-14	2018-05-14	7.5	>= 5kg	73	UVH, mitral atresia, VSD, dTGA relationship	cyanosis	yes	no		no	no	no	no	no		no	no	no	yes	PA banding with PDA ligation 06.06.2018	no		2	class 1-2	no	no	no		no		2019-04-19	BDG with debanding PA with PA plasty	7	other	>= 6.2 score	elective	elective	open heart	320	>=240 min	201	>=85 min	>=90 min	CBP time > 90 min	126	>=60min
post	253	male	2020-01-25	2020-01-25	2.5	< 5 kg	48	dTGA with hypoplastic aortic arch with moderate perimembranous VSD with ASD secundum	cyanosis	no	no		no	no	no	no	no		no	yes	no	no		no		3	class 3-4	yes	no	no		no		2020-02-19	Arterial switch operation with VSD patch repair with ASD primary closure	11	other	>= 6.2 score	elective	elective	open heart	705	>=240 min	161	>=85 min	>=90 min	CBP time > 90 min	209	>=60min
post	46	female	2019-08-28	2019-08-28	3.4	< 5 kg	48.5	Truncus arteriosus type II	cyanosis	no	no		no	no	no	no	no		no	yes	no	no		yes	pneumonia	3	class 3-4	no	no	no		no		2019-10-21	repair of truncus with VSD closure	11	other	>= 6.2 score	elective	elective	open heart	330	>=240 min	261	>=85 min	>=90 min	CBP time > 90 min	107	>=60min
pre	30	female	2018-08-01	2018-10-08	2.9	< 5 kg	52	Juxtaductal CoA with muscular VSD, ASD	acyanosis	no	no		no	no	no	no	no		no	yes	no	no		yes	A.baum pneumonia	4	class 3-4	yes	no	no		yes	Meropenem, Colistin	2018-10-30	Total repair	10	other	>= 6.2 score	elective	elective	open heart	300	>=240 min	171	>=85 min	>=90 min	CBP time > 90 min	117	>=60min
pre	276	female	2012-12-18	2013-02-01	14	>= 5kg	106	DORV,subpulmonic VSD, no PS, small PDA, severe PAH	cyanosis	no	no		no	no	no	no	no		no	yes	yes	no		no		3	class 3-4	no	no	no		no		2018-06-15	Arterial swicth operation	10	other	>= 6.2 score	elective	elective	open heart	240	>=240 min	176	>=85 min	>=90 min	CBP time > 90 min	132	>=60min
post	170	female	2019-08-29	#NULL!	2.9	< 5 kg	54	dTGA with IVS with restrictive ASD s/p BAS	cyanosis	no	no		no	no	no	no	no		no	yes	no	no		yes	late neonatal sepsis	4	class 3-4	no	no	yes	PGE1	yes	Cefotaxime amikacin	2019-09-09	Arterial switch with direct closure ASD	10	other	>= 6.2 score	elective	elective	open heart	470	>=240 min	274	>=85 min	>=90 min	CBP time > 90 min	146	>=60min
pre	44	male	2009-10-21	#NULL!	22	>= 5kg	130	Corrected TGA, VSD, PA	cyanosis	no	yes	Multiple anomaly	no	no	no	yes	no		no	no	no	yes	LMBTS 21.10.2009, RMBTS 16.10.2011	no		2	class 1-2	no	no	no		no		2018-11-09	Arterial switch and Rastelli operation	10	other	>= 6.2 score	elective	elective	open heart	360	>=240 min	268	>=85 min	>=90 min	CBP time > 90 min	169	>=60min
post	19	male	2010-06-26	2010-06-29	18.4	>= 5kg	107.5	Complete AV canal type C, mild AVVR, pulmonary atresia, hypoplastic LV	acyanosis	no	yes	Down syndrome	yes	no	no	no	yes	Congenital ET with amblyopia Lt eye	no	no	no	yes	RMBTS 09.07.2010	no		2	class 1-2	no	no	no		no		2019-08-02	complete AVSD repair with bidiractional Glenn shunt	9	other	>= 6.2 score	elective	elective	open heart	245	>=240 min	190	>=85 min	>=90 min	CBP time > 90 min	123	>=60min
post	97	male	2008-11-01	2010-10-25	36	>= 5kg	141.6	UVH, dextrocardia, unblanced CACV	cyanosis	yes	no		no	no	no	no	no		no	no	no	yes	BDG 07.03.2011	no		2	class 1-2	no	no	no		no		2019-05-08	Fontan	9	other	>= 6.2 score	elective	elective	open heart	480	>=240 min	305	>=85 min	>=90 min	CBP time > 90 min	52	<60 min
pre	84	female	2008-06-23	#NULL!	51.5	>= 5kg	144	PA, TA	cyanosis	yes	no		no	no	no	no	no		no	yes	no	yes	LMBTS, BDG 2011	no		2	class 1-2	no	no	no		no		2019-03-11	Extracardiac fontan with fenestration	9	other	>= 6.2 score	elective	elective	open heart	575	>=240 min	263	>=85 min	>=90 min	CBP time > 90 min	#NULL!	#NULL!
post	47	female	2020-01-17	2020-01-23	2.8	< 5 kg	52	CoA, large perimembranous to muscular VSD, small ASD, PDA	acyanosis	no	no		no	no	no	no	no		no	yes	no	no		yes	pneumonia	3	class 3-4	no	no	no		no		2020-02-11	extended coarctectomy with end to end anastomosis with VSD closure with suture ASD	8	other	>= 6.2 score	elective	elective	open heart	250	>=240 min	167	>=85 min	>=90 min	CBP time > 90 min	67	>=60min
post	20	male	2016-04-09	2016-04-09	10.7	>= 5kg	81	TOF with severe PS, unrestricted VSD	cyanosis	no	no		no	no	no	no	no		no	no	no	no		no		3	class 3-4	no	no	no		no		2019-08-29	Total repair	8	other	>= 6.2 score	elective	elective	open heart	240	>=240 min	167	>=85 min	>=90 min	CBP time > 90 min	116	>=60min
pre	156	female	2001-06-27	2001-06-27	43	>= 5kg	156	PA/VSD, S/P RMBTS, LMBTS with suture ligated of Rt.SCA S/P total correction (Rastelli's operation) with aortic homograft No.21 on 29/9/2549	cyanosis	no	no		no	no	no	no	yes	Asthma, left diaphram paralysis	no	no	no	yes	RMBTS, LMBTS with suture ligated of Rt.SCA S/P total correction (Rastelli's operation) with aortic homograft No.21 on 29/9/2549	no		2	class 1-2	no	no	no		no		2018-11-22	Redo PVR with RV-PA conduit (22 mm Goretex tube with 0.1 mm goretex membrane trileaflet valve)	8	other	>= 6.2 score	elective	elective	open heart	295	>=240 min	114	>=85 min	>=90 min	CBP time > 90 min	73	>=60min
post	150	male	2019-04-28	2019-05-14	4	< 5 kg	54	DORV subaortic VSD, secundum ASD, CoA	cyanosis	no	no		no	no	no	no	yes	limb anomaly	no	yes	no	no		no		2	class 1-2	no	no	yes	lasix,aldactone	no		2019-08-05	Total repair	8	other	>= 6.2 score	elective	elective	open heart	415	>=240 min	230	>=85 min	>=90 min	CBP time > 90 min	127	>=60min
pre	104	male	2007-08-18	2007-08-18	27	>= 5kg	128	Rt isomerism, CACV, PA, TAPVR s/p TAPVR repair PA banding, BDG with RMBTS	cyanosis	yes	no		no	no	no	no	no		yes	yes	yes	yes	RMBTS 27.04.2010	no		3	class 3-4	no	no	yes	ASA,sidenafil	no		2018-08-02	Redo AV valve replacement	7.5	other	>= 6.2 score	elective	elective	open heart	285	>=240 min	157	>=85 min	>=90 min	CBP time > 90 min	76	>=60min
post	58	female	2013-05-07	2014-02-01	15.5	>= 5kg	105	UVH,modretae PS,bilateral SVC, TAPVR with obstruction with svere AVVR	cyanosis	yes	no		no	no	no	no	no		no	no	no	yes	BDG, TAPVR repair 10.11.2014	no		3	class 3-4	no	no	yes	digoxin,carvedilol	no		2019-04-02	AVV replacement	7	other	>= 6.2 score	elective	elective	open heart	295	>=240 min	152	>=85 min	>=90 min	CBP time > 90 min	55	<60 min
post	11	female	2014-10-03	#NULL!	22.5	>= 5kg	104	DORV with diubly committed VSD	cyanosis	no	no		no	no	no	no	no		no	yes	no	yes	PA banding 05.01.2015	no		2	class 1-2	no	no	yes	lasix,captopril	no		2019-06-04	Redo-one and half ventrivular repair	7	other	>= 6.2 score	elective	elective	open heart	390	>=240 min	254	>=85 min	>=90 min	CBP time > 90 min	149	>=60min
pre	68	male	2019-02-08	#NULL!	2.7	< 5 kg	50	d-TGA with non restrictive ASD, tiny VSD, PDA	cyanosis	no	no		no	no	no	no	no		no	no	no	no		yes		2	class 1-2	no	no	yes	PGE1	yes	PIP/TAZ	2019-02-14	Arterial switch with VSD closure	11	other	>= 6.2 score	elective	elective	open heart	325	>=240 min	197	>=85 min	>=90 min	CBP time > 90 min	121	>=60min
pre	221	female	2018-03-09	2018-03-11	3.12	< 5 kg	52	Truncus arteriosus type I	cyanosis	no	yes	VACTREL anomaly	no	no	no	yes	no		no	yes	no	no		yes	Pneumonia	3	class 3-4	yes	no	no		yes	Meropenem	2018-04-05	Total repair by pulmonary artery excision, RV-PA conduit with Contegra 12 mm, VSD Closure with Gluteraldehyde treated pericardial patch and partial ASD secundum closure	11	other	>= 6.2 score	elective	elective	open heart	245	>=240 min	157	>=85 min	>=90 min	CBP time > 90 min	117	>=60min
post	260	female	2019-09-27	2019-09-27	4.5	< 5 kg	55	dTGA,VSD,hypoplastic arch	cyanosis	no	no		no	no	no	no	no		no	yes	no	no		yes	pneumonia	3	class 3-4	no	no	no		no		2019-10-15	Aortic arch augmentation with arterial switch operation with direct closure of ASD with PDA division	11	other	>= 6.2 score	elective	elective	open heart	615	>=240 min	336	>=85 min	>=90 min	CBP time > 90 min	203	>=60min
post	29	male	2019-10-10	#NULL!	3.2	< 5 kg	54	Truncus arteriosus type IA, ASD, VSD	cyanosis	no	no		no	no	no	no	no		no	yes	no	no		no		3	class 3-4	no	no	yes	lasix,aldactone	no		2019-11-14	Truncus repair	11	other	>= 6.2 score	elective	elective	open heart	250	>=240 min	158	>=85 min	>=90 min	CBP time > 90 min	80	>=60min
pre	8	female	2012-04-16	2012-04-16	22	>= 5kg	119	Dextrocardia,ccTGA,ASD,VSD,PS	cyanosis	no	no		no	no	no	no	no		no	yes	no	yes	LMBTS 04.2012, RMBTS 05.2013	no		2	class 1-2	no	no	no		no		2018-09-14	Glenn's opeartion with Rastelli's operation	11	other	>= 6.2 score	elective	elective	open heart	320	>=240 min	236	>=85 min	>=90 min	CBP time > 90 min	150	>=60min
post	10	male	2013-12-24	#NULL!	10.9	>= 5kg	100	Congenital severe AS, modrate AR	acyanosis	no	no		no	no	no	no	yes	bilateral nephrocalcinosis	no	no	no	no		no		3	class 3-4	no	no	no		no		2019-11-01	AV neocuspidization	11	other	>= 6.2 score	elective	elective	open heart	275	>=240 min	199	>=85 min	>=90 min	CBP time > 90 min	157	>=60min
post	220	female	2019-11-12	2019-12-11	2.7	< 5 kg	50	Interrupted aortic arch type B, perimembranous VSD, secundum ASD	acyanosis	no	yes	CHARGE syndrome	no	no	yes	no	no		no	yes	yes	no		yes		3	class 3-4	yes	no	no		yes	meropenem	2020-01-02	IAA repair, VSD closure	10.8	other	>= 6.2 score	elective	elective	open heart	330	>=240 min	110	>=85 min	>=90 min	CBP time > 90 min	104	>=60min
pre	180	female	2012-04-24	2012-04-24	15.8	>= 5kg	111	TGA, VSD, PS	cyanosis	no	no		no	no	no	no	no		no	no	no	no		no		2	class 1-2	no	no	no		no		2019-01-14	Rastelli's operation ASD closure	10	other	>= 6.2 score	elective	elective	open heart	390	>=240 min	216	>=85 min	>=90 min	CBP time > 90 min	164	>=60min
pre	87	female	2019-02-24	2019-02-24	4.1	< 5 kg	55	dTGA, IVS	cyanosis	no	no		no	no	no	no	no		no	no	no	no		yes		3	class 3-4	no	no	no		yes	Meropenem	2019-03-04	Arterial switch	10	other	>= 6.2 score	elective	elective	open heart	410	>=240 min	205	>=85 min	>=90 min	CBP time > 90 min	114	>=60min
pre	181	female	2011-06-06	2011-06-10	20	>= 5kg	120	PA/VSD, dextrocardia s/p LMBTS	cyanosis	no	no		no	no	no	no	no		no	no	no	yes	LMBTS	no		2	class 1-2	no	no	yes	ASA	no		2019-01-15	Total repair with 16 mm goretex valve conduit	10	other	>= 6.2 score	elective	elective	open heart	480	>=240 min	167	>=85 min	>=90 min	CBP time > 90 min	26	<60 min
post	120	male	2018-03-06	2018-03-06	6.8	>= 5kg	999	PA/VSD confluent PA, PDA	cyanosis	no	no		no	no	no	no	no		no	no	no	yes	RMBTS 23.05.2018	no		2	class 1-2	no	no	no		no		2019-06-21	Total repair	9	other	>= 6.2 score	elective	elective	open heart	245	>=240 min	149	>=85 min	>=90 min	CBP time > 90 min	87	>=60min
pre	40	male	2007-11-07	#NULL!	24.3	>= 5kg	137	Common atrium common ventricle with moderate PS	cyanosis	yes	no		no	no	no	no	no		yes	no	no	yes	RMBTS 12.11,2007, BDG 04.05.2009	no		2	class 1-2	no	no	no		no		2018-11-16	Fontan operation	9	other	>= 6.2 score	elective	elective	open heart	330	>=240 min	174	>=85 min	>=90 min	CBP time > 90 min	#NULL!	#NULL!
pre	47	male	2018-04-02	2018-04-02	5.9	>= 5kg	66	Complete AVSD	acyanosis	no	yes	Down syndrome	yes	no	no	no	no		no	no	no	no		no		2	class 1-2	no	no	no		no		2018-11-30	Total repair	9	other	>= 6.2 score	elective	elective	open heart	320	>=240 min	120	>=85 min	>=90 min	CBP time > 90 min	83	>=60min
post	41	female	2011-06-14	2011-06-14	19	>= 5kg	118	Rt isomerism, CACV, supracardiac TAPVR s/p RMBTS, Glenn	cyanosis	no	no		no	no	no	no	no		no	no	no	yes	RMBTS, Glenn 12.03.2012	no		2	class 1-2	no	no	no		no		2020-01-13	Fontan	9	other	>= 6.2 score	elective	elective	open heart	465	>=240 min	249	>=85 min	>=90 min	CBP time > 90 min	#NULL!	#NULL!
post	217	male	2018-10-09	2018-10-09	7.2	>= 5kg	72	TOF	cyanosis	no	yes	Down syndrome	yes	no	no	no	yes	Imperforated anus, hypothyroid, r/o moya moya syndrome	no	no	no	no		yes	UTI, pneumonia	3	class 3-4	no	no	yes	propanolol	no		2019-12-25	Total repair	8	other	>= 6.2 score	elective	elective	open heart	360	>=240 min	221	>=85 min	>=90 min	CBP time > 90 min	163	>=60min
post	182	female	2017-03-21	#NULL!	18.5	>= 5kg	100	TOF with absent pulmonic valve syndrome	cyanosis	no	no		no	no	no	no	no		no	no	no	no		no		2	class 1-2	no	no	no		no		2019-10-08	Total repair	8	other	>= 6.2 score	elective	elective	open heart	280	>=240 min	202	>=85 min	>=90 min	CBP time > 90 min	153	>=60min
pre	21	female	2017-07-25	#NULL!	9	>= 5kg	75	TOF	cyanosis	no	no		no	no	no	no	no		no	no	no	no		no		2	class 1-2	no	no	no		no		2018-10-08	Total repair	8	other	>= 6.2 score	elective	elective	open heart	250	>=240 min	131	>=85 min	>=90 min	CBP time > 90 min	104	>=60min
post	69	female	2020-02-23	#NULL!	3	< 5 kg	49	VSD,ASD,PDA, hypoplastic arch with juxta ductal CoA	acyanosis	no	no		no	no	no	no	no		no	yes	no	no		no		3	class 3-4	no	no	yes	PGE1	no		2020-03-06	Total repair	7.8	other	>= 6.2 score	elective	elective	open heart	240	>=240 min	107	>=85 min	>=90 min	CBP time > 90 min	92	>=60min
post	216	male	2018-10-01	#NULL!	11.7	>= 5kg	79	Rt isomerism CACV with pulmonary stenosis	cyanosis	yes	no		no	no	no	no	no		yes	no	no	yes	LMBTS 16.03.2019	no		2	class 1-2	no	no	no		no		2019-12-19	Bilateral BDG	7.5	other	>= 6.2 score	elective	elective	open heart	335	>=240 min	223	>=85 min	>=90 min	CBP time > 90 min	#NULL!	#NULL!
post	37	male	2018-10-01	#NULL!	11.7	>= 5kg	79	UVH with mild to moderate PS	cyanosis	yes	no		no	no	no	no	no		yes	no	no	yes	LMBTS 16.03.2019	no		2	class 1-2	no	no	no		no		2019-12-19	bilateral bidirectional Glenn	7.5	other	>= 6.2 score	elective	elective	open heart	335	>=240 min	223	>=85 min	>=90 min	CBP time > 90 min	#NULL!	#NULL!
post	12	male	2017-09-10	2018-01-02	7.9	>= 5kg	82	Rt isomerism with supracardiac TAPVR with bilateral SVC with severe subvalvular PS	cyanosis	no	no		no	no	no	no	yes	GDD	yes	no	no	no		no		3	class 3-4	no	no	no		no		2019-11-04	Bilat BDG	7.5	other	>= 6.2 score	elective	elective	open heart	340	>=240 min	238	>=85 min	>=90 min	CBP time > 90 min	#NULL!	#NULL!
pre	39	male	2015-05-20	2015-05-20	12.3	>= 5kg	86.7	TOF	cyanosis	no	no		no	no	no	no	no		no	no	no	no		no		2	class 1-2	no	no	yes	Propanolol	no		2018-11-16	Total repair	7.5	other	>= 6.2 score	elective	elective	open heart	240	>=240 min	112	>=85 min	>=90 min	CBP time > 90 min	61	>=60min
post	133	male	2015-05-18	2015-05-18	15.2	>= 5kg	999	Dextrocardia CACV severe valve and subvalve PS, bilateral SVC, PAPVR	cyanosis	yes	no		no	no	no	no	no		yes	yes	no	no		no		2	class 1-2	no	no	no		no		2019-07-01	Bilateral BDG with MPA division	7.5	other	>= 6.2 score	elective	elective	open heart	255	>=240 min	126	>=85 min	>=90 min	CBP time > 90 min	#NULL!	#NULL!
post	143	female	2019-03-21	2019-04-07	3.7	< 5 kg	59	Large perimembranous VSD with hypoplastic aortic arch with CoA	acyanosis	no	no		no	no	no	no	no		no	yes	no	no		no		3	class 3-4	no	no	yes	lasix,aldactone	no		2019-07-26	Total repiar	7	other	>= 6.2 score	elective	elective	open heart	270	>=240 min	146	>=85 min	>=90 min	CBP time > 90 min	60	>=60min
post	223	female	2015-07-09	#NULL!	15.8	>= 5kg	107	DORV (TOF physiology) proximal LPA stenosis, PDA, bilateral SVC	cyanosis	no	no		no	no	no	no	no		no	no	no	no		no		2	class 1-2	no	no	no		no		2020-01-06	Total repair	7	other	>= 6.2 score	elective	elective	open heart	420	>=240 min	255	>=85 min	>=90 min	CBP time > 90 min	183	>=60min
pre	5	male	2016-08-02	2016-08-02	6.4	>= 5kg	70	DORV subaortic VSD with Mild PS, complete heart block	cyanosis	no	no		no	no	no	no	yes	Hyperactive airway	no	yes	no	yes	PDA ligation 17.08.2016	no		2	class 1-2	no	no	no		no		2018-09-07	Total repair	7	other	>= 6.2 score	elective	elective	open heart	260	>=240 min	130	>=85 min	>=90 min	CBP time > 90 min	81	>=60min
pre	267	male	2017-03-18	#NULL!	8.8	>= 5kg	75	PA IVS	cyanosis	no	yes	Chromosome disorder	no	no	no	yes	yes	Anorectal malformation	no	no	no	yes	RMBTS 27.03.2017	no		3	class 3-4	no	no	no		no		2018-04-25	BDG	7	other	>= 6.2 score	elective	elective	open heart	250	>=240 min	90	>=85 min	>=90 min	CBP time > 90 min	#NULL!	#NULL!
pre	38	male	2018-11-10	2018-11-11	4	< 5 kg	54	PA/VSD, confluent PA	cyanosis	no	no		no	no	no	no	no		no	no	no	no		yes		2	class 1-2	no	no	yes	PGE!	yes	Meropenem	2018-11-22	RMBTS	6.3	6.3 score	>= 6.2 score	elective	elective	open heart	80	<240 min	#NULL!	#NULL!	no	closed and < 90 min	#NULL!	#NULL!
pre	9	female	2017-07-04	2017-07-04	9.5	>= 5kg	999	Severe TOF	cyanosis	no	yes	Down syndrome	yes	no	no	no	no		no	no	no	no		yes	Pneumonia	3	class 3-4	no	no	yes	Propanolol	no		2018-08-29	RBMTS	6.3	6.3 score	>= 6.2 score	elective	elective	open heart	90	<240 min	#NULL!	#NULL!	no	closed and < 90 min	#NULL!	#NULL!
pre	266	male	2018-02-06	#NULL!	3.2	< 5 kg	999	Preductal CoA with PDA, small ASD VSD	acyanosis	no	no		no	no	no	no	yes	Cleft lip cleft palate, severe laryngomalacia	no	yes	no	no		yes	Pneumonia	3	class 3-4	no	no	no		no		2018-04-17	Extended coarctectomy with PDA division	8	other	>= 6.2 score	elective	elective	open heart	120	<240 min	#NULL!	#NULL!	no	closed and < 90 min	22	<60 min
pre	6	male	2016-10-18	2016-10-18	9.9	>= 5kg	88	PAVSD,confluent PA, MAPCA	cyanosis	no	yes	DiGeorge syndrome	no	yes	no	no	no		no	no	no	no		no		2	class 1-2	no	no	no		no		2018-09-10	Central shunt	7.8	other	>= 6.2 score	elective	elective	open heart	185	<240 min	#NULL!	#NULL!	no	closed and < 90 min	#NULL!	#NULL!
post	176	female	2019-07-22	2019-07-22	3.5	< 5 kg	52	TOF	cyanosis	no	no		no	no	no	no	yes	Multiple anomaly	no	no	no	no		no		2	class 1-2	no	no	no		no		2019-09-24	RMBTS	6.3	6.3 score	>= 6.2 score	elective	elective	closed heart	110	<240 min	#NULL!	#NULL!	no	closed and < 90 min	#NULL!	#NULL!
pre	37	male	2016-08-02	2016-11-01	10	>= 5kg	66	DORV subaortic VSD with PS	cyanosis	no	no		no	no	no	no	no		no	no	no	no		no		4	class 3-4	no	no	yes	Propanolol	no		2018-11-08	LMBTS	6.3	6.3 score	>= 6.2 score	emergency	emergency or urgency	open heart	150	<240 min	#NULL!	#NULL!	no	closed and < 90 min	#NULL!	#NULL!
pre	55	male	2018-12-14	2018-12-14	2.6	< 5 kg	999	Right isomerism, UVH	cyanosis	yes	no		no	no	no	no	no		yes	no	no	no		no		2	class 1-2	no	no	yes	PGE1	no		2018-12-20	RMBTS with PDA ligation	6.3	6.3 score	>= 6.2 score	elective	elective	open heart	140	<240 min	#NULL!	#NULL!	no	closed and < 90 min	#NULL!	#NULL!
pre	176	female	2018-10-11	2018-10-14	3.2	< 5 kg	56	PA/VSD, confluent Pas, APC from LsCa to LPA	cyanosis	no	yes	DiGeorge syndrome	no	yes	no	no	no		no	no	no	no		no		2	class 1-2	no	no	no		no		2019-01-11	LMBTS to RPA	6.3	6.3 score	>= 6.2 score	urgency	emergency or urgency	closed heart	105	<240 min	#NULL!	#NULL!	no	closed and < 90 min	#NULL!	#NULL!
post	25	female	2019-07-16	2019-07-20	3.42	< 5 kg	51	Tricuspid atresia, unrestrictive ASD, DORV, VSD	cyanosis	no	no		no	no	no	no	no		no	no	no	no		no		3	class 3-4	no	no	no		no		2019-10-01	RMBTS	6.3	6.3 score	>= 6.2 score	elective	elective	closed heart	165	<240 min	#NULL!	#NULL!	no	closed and < 90 min	#NULL!	#NULL!
post	38	female	2014-11-10	2015-04-01	20.8	>= 5kg	107	PA/VSD,MAPCAs	cyanosis	no	yes	DiGeorge syndrome	no	yes	no	no	no		no	no	no	no		no		2	class 1-2	no	no	no		no		2019-10-25	Rt unifocalization	11	other	>= 6.2 score	elective	elective	closed heart	165	<240 min	#NULL!	#NULL!	no	closed and < 90 min	#NULL!	#NULL!
post	228	male	2019-12-18	2020-01-06	2.9	< 5 kg	49	Severe juxtaductal CoA with large PDA	acyanosis	no	no		no	no	no	no	no		no	no	no	no		yes	congenital pneumonia	3	class 3-4	no	no	no		no		2020-01-10	Extended coarctectomy with end to end anastomosis with PDA ligation	8	other	>= 6.2 score	elective	elective	closed heart	100	<240 min	#NULL!	#NULL!	no	closed and < 90 min	17	<60 min
post	175	male	2019-06-20	2019-09-13	4.4	< 5 kg	999	Severe juxtaductal CoA with PDA	acyanosis	no	no		no	no	no	no	no		no	no	no	no		no		2	class 1-2	no	no	yes	PGE1	no		2019-09-20	Coarctectomy with end to end anastomosis with PDA ligation	8	other	>= 6.2 score	elective	elective	closed heart	80	<240 min	#NULL!	#NULL!	no	closed and < 90 min	#NULL!	#NULL!
pre	280	female	2018-05-28	2018-05-28	999	#NULL!	999	Juxtaductal CoA	acyanosis	no	no		no	no	no	no	no		no	yes	no	no		yes	Late neonatal sepsis	3	class 3-4	yes	no	no		yes	Meropenem	2018-07-02	Coarctectomy with end to end anastomosis and PDA ligation	8	other	>= 6.2 score	elective	elective	open heart	140	<240 min	#NULL!	#NULL!	no	closed and < 90 min	26	<60 min
pre	50	male	2018-10-11	2018-10-11	3.3	< 5 kg	54	Corrected TGA, PA, VSD, confluent PA	cyanosis	no	no		no	no	no	no	no		no	no	no	no		no		3	class 3-4	no	no	yes	PGE1	no		2018-12-07	RMBTS	6.3	6.3 score	>= 6.2 score	elective	elective	open heart	60	<240 min	#NULL!	#NULL!	no	closed and < 90 min	#NULL!	#NULL!
pre	26	male	2017-09-28	2018-03-20	8	>= 5kg	72.8	PA/VSD, small confluent PA, MAPCA	cyanosis	no	no		no	no	no	no	no		no	no	no	no		no		2	class 1-2	no	no	no		no		2018-10-19	MBTS	6.3	6.3 score	>= 6.2 score	elective	elective	open heart	100	<240 min	#NULL!	#NULL!	no	closed and < 90 min	#NULL!	#NULL!
pre	105	male	2017-08-08	2017-08-08	7.9	>= 5kg	72	PA/VSD, PDA s/p RMBTS with PDA ligation with thrombosed RMBTS	cyanosis	no	no		no	no	no	no	no		no	no	no	yes	RMBTS 15.08.2017	no		3	class 3-4	no	no	no		no		2018-08-02	LMBTS	6.3	6.3 score	>= 6.2 score	elective	elective	closed heart	85	<240 min	#NULL!	#NULL!	no	closed and < 90 min	#NULL!	#NULL!
post	233	male	2017-11-30	2017-11-30	12.5	>= 5kg	96	ccTGA, large inlet VSD, PA with confluent PA	cyanosis	no	no		no	no	no	no	no		no	no	no	yes	RMBTS 06.12.2017	no		2	class 1-2	no	no	no		no		2020-01-22	LMBTS	6.3	6.3 score	>= 6.2 score	elective	elective	closed heart	120	<240 min	#NULL!	#NULL!	no	closed and < 90 min	#NULL!	#NULL!
pre	96	male	2017-07-14	2017-07-17	8.8	>= 5kg	82	PA/VSD, confluent PA, LPA hypoplasia	cyanosis	no	no		no	no	no	no	no		no	no	no	yes	PDA stent 25.07.2017	no		3	class 3-4	no	no	no		no		2019-01-30	LMBTS	6.3	6.3 score	>= 6.2 score	elective	elective	open heart	150	<240 min	#NULL!	#NULL!	no	closed and < 90 min	#NULL!	#NULL!
post	81	female	2020-01-31	2020-02-03	3	< 5 kg	51	Tricuspid atresia, PA	cyanosis	yes	no		no	no	no	no	no		no	no	no	no		no		3	class 3-4	no	no	yes	PGE1	no		2020-02-14	RMBTS	6.3	6.3 score	>= 6.2 score	elective	elective	closed heart	85	<240 min	#NULL!	#NULL!	no	closed and < 90 min	#NULL!	#NULL!
post	237	male	2017-08-24	2017-08-28	9.1	>= 5kg	78.5	PA/VSD, MAPCA confluent PA	cyanosis	no	yes	DiGeorge syndrome	no	yes	no	no	yes	T cell defect	no	no	no	no		no		2	class 1-2	no	no	no		no		2020-01-30	RMBTS	6.3	6.3 score	>= 6.2 score	elective	elective	closed heart	150	<240 min	#NULL!	#NULL!	no	closed and < 90 min	#NULL!	#NULL!
pre	17	female	2018-07-27	2018-07-27	2.8	< 5 kg	48	PA/IVS	cyanosis	no	no		no	no	no	no	no		no	no	no	no		no		2	class 1-2	no	no	no		no		2018-10-02	LMBTS	6.3	6.3 score	>= 6.2 score	elective	elective	open heart	210	<240 min	#NULL!	#NULL!	no	closed and < 90 min	#NULL!	#NULL!
post	14	female	2019-08-03	2019-08-03	4.3	< 5 kg	52	Tricuspid atresia with non restricted VSD with mild PS with flap PFO	cyanosis	no	no		no	no	no	no	no		no	yes	no	no		no		2	class 1-2	no	no	no		no		2019-10-31	RMBTS	6.3	6.3 score	>= 6.2 score	elective	elective	closed heart	120	<240 min	#NULL!	#NULL!	no	closed and < 90 min	#NULL!	#NULL!
post	54	female	2020-02-18	2020-02-21	3.1	< 5 kg	52	Dextrocardia with PA with VSD with confluent PA	cyanosis	no	no		no	no	no	no	no		no	no	no	no		no		2	class 1-2	no	no	yes	PGE1	no		2020-03-19	RMBTS	6.3	6.3 score	>= 6.2 score	elective	elective	closed heart	120	<240 min	#NULL!	#NULL!	no	closed and < 90 min	#NULL!	#NULL!
post	7	male	2019-04-18	#NULL!	3.1	< 5 kg	53	Hypoplastic arch with severe CoA, moderate sized perimembrnous VSD, ASD secundum with PHT	acyanosis	no	no		no	no	no	no	no		no	yes	yes	no		no		3	class 3-4	no	no	no		no		2019-05-23	Extended coarctectomy with PDA division	8	other	>= 6.2 score	elective	elective	closed heart	280	>=240 min	#NULL!	#NULL!	no	closed and < 90 min	31	<60 min
pre	285	female	2015-09-08	2016-02-01	12.5	>= 5kg	87	ccTGA with PA, VSD with dextrocardia s/p LMBTS	cyanosis	no	no		no	no	no	no	no		no	yes	no	yes	LMBTS 07.08.2017	no		2	class 1-2	no	no	no		no		2018-07-12	RMBTS	6.3	6.3 score	>= 6.2 score	elective	elective	closed heart	610	>=240 min	#NULL!	#NULL!	no	closed and < 90 min	#NULL!	#NULL!
post	24	female	2011-10-07	2017-10-07	14.7	>= 5kg	108	TOF with non-confluenet PA	cyanosis	no	yes	Down syndrome	yes	no	no	no	yes	congenital hypothyroid	no	no	no	no		no		2	class 1-2	no	no	no		no		2019-10-04	RMBTS with PA reconstruction	6.3	6.3 score	>= 6.2 score	elective	elective	closed heart	250	>=240 min	#NULL!	#NULL!	no	closed and < 90 min	#NULL!	#NULL!
post	40	female	2019-12-12	#NULL!	3	< 5 kg	52	Pulmonary atresia confluent PA, small PDA	acyanosis	yes	yes	Heterotaxy syndrome	no	no	no	yes	no		yes	no	no	no		no		4	class 3-4	yes	yes	yes	PGE1	yes	Cefotaxime	2019-12-29	Systemic to pulmonary shunt from left innominate artery to proximal LPA	6.8	other	>= 6.2 score	emergency	emergency or urgency	open heart	150	<240 min	78	< 85min	< 90min	closed and < 90 min	#NULL!	#NULL!
pre	212	male	2019-02-02	#NULL!	2.1	< 5 kg	45	Common ventricle TAPVR with PA	cyanosis	yes	no		no	no	no	no	yes	Hiatal hernia, bronchomalacia	yes	no	no	no		yes	A.Buamanii pneumonia	3	class 3-4	yes	yes	yes	PGE1, cefotaxime + vanco then pip-taz	yes	cefotaxime vanco then PIP-TAZ	2019-03-19	LMBTS 3.5 mm Goretex with median sternotomy approach	6.3	6.3 score	>= 6.2 score	urgency	emergency or urgency	open heart	205	<240 min	54	< 85min	< 90min	closed and < 90 min	#NULL!	#NULL!
post	33	male	2019-12-11	#NULL!	2.5	< 5 kg	50	dTGA,VSD,PS	cyanosis	no	no		no	no	no	no	no		no	no	no	no		no		2	class 1-2	no	yes	yes	PGE1	no		2019-12-23	RMBTS with PDA division	6.3	6.3 score	>= 6.2 score	elective	elective	open heart	195	<240 min	88	>=85 min	< 90min	closed and < 90 min	#NULL!	#NULL!
pre	147	male	2018-10-27	2018-10-28	3.1	< 5 kg	51	Obstructed infracardiac TAPVR, PPHN	cyanosis	no	no		no	no	no	no	yes	PPHN	no	yes	yes	no		no		4	class 3-4	yes	yes	yes	Dopa, dobu, adrenalin, Ampi, Genta, iNO	yes	ampi, genta	2018-10-29	Repaired of TAPVR with PFO closure with pericardial patch with PDA ligation, VA ECMO	9	other	>= 6.2 score	emergency	emergency or urgency	open heart	235	<240 min	198	>=85 min	>=90 min	CBP time > 90 min	100	>=60min
post	234	male	2020-01-21	#NULL!	2.9	< 5 kg	50	Rt isomerism, bilateral SVC, UVH, confluent PA, TAPVR with obstruction	cyanosis	yes	no		no	no	no	no	yes	congenital hypothyroid	yes	no	no	no		no		4	class 3-4	yes	yes	no		no		2020-01-23	RMBTS, repair of TAPVR	9	other	>= 6.2 score	elective	elective	open heart	202	<240 min	105	>=85 min	>=90 min	CBP time > 90 min	36	<60 min
pre	208	female	2019-02-27	2019-02-28	3	< 5 kg	50	Common ventricle, severe PS	cyanosis	yes	no		no	no	no	no	no		yes	no	no	no		yes	clinical sepsis on cefotaxime, amikacin	3	class 3-4	no	yes	yes	PGE1, cefotaxime, amikin	no		2019-03-11	RMBTS, PDA ligation	6.3	6.3 score	>= 6.2 score	urgency	emergency or urgency	open heart	210	<240 min	94	>=85 min	>=90 min	CBP time > 90 min	#NULL!	#NULL!
pre	2	male	2018-08-26	#NULL!	2.7	< 5 kg	33	dTGA with small VSD	cyanosis	no	no		no	no	no	no	no		no	no	no	no		yes		4	class 3-4	no	yes	yes	PGE1	yes	Ampicillin	2018-08-31	Arterial switch with PDA ligation with PFO closure	10	other	>= 6.2 score	elective	elective	open heart	220	<240 min	145	>=85 min	>=90 min	CBP time > 90 min	73	>=60min
pre	43	male	2018-09-02	2018-11-23	6	>= 5kg	999	ALCAPA with severe MR with decreased LV function	acyanosis	no	no		no	no	no	no	no		no	yes	no	no		yes		2	class 1-2	yes	yes	no		yes	Cefotaxime	2018-11-30	LCA translocation	10	other	>= 6.2 score	elective	elective	open heart	195	<240 min	108	>=85 min	>=90 min	CBP time > 90 min	80	>=60min
post	28	male	2019-08-22	2019-10-22	2.8	< 5 kg	55	Large perimembranous VSD with hypoplastic aortic arch with ASD secundum	acyanosis	no	no		no	no	no	no	no		no	yes	no	no		no		4	class 3-4	yes	yes	yes	lasix	yes	levofloxacin,meropenem	2019-11-01	ASD and VSD closure, aortic arch repair	10	other	>= 6.2 score	elective	elective	open heart	155	<240 min	158	>=85 min	>=90 min	CBP time > 90 min	70	>=60min
pre	13	male	2018-08-16	2018-08-17	3.7	< 5 kg	51	DORA subaortic VSD	cyanosis	no	yes	Down syndrome	yes	no	no	no	yes	G6PD deficiency	no	yes	no	no		yes	VAP	4	class 3-4	yes	yes	no		yes	Cefoperazone	2018-09-26	Total repair	7	other	>= 6.2 score	elective	elective	open heart	180	<240 min	100	>=85 min	>=90 min	CBP time > 90 min	62	>=60min
pre	24	male	2018-02-19	2018-08-31	7.7	>= 5kg	68	DORV subaortic VSD with severe MR, Hypoplastic arch	cyanosis	no	no		no	no	no	no	yes	Cerebral cystic hygroma with epilepsy	no	yes	no	no		yes	Penumonia with RS failure with DIC	3	class 3-4	yes	yes	no		yes	Colisitn	2018-10-31	DORV repair	7	other	>= 6.2 score	elective	elective	open heart	175	<240 min	103	>=85 min	>=90 min	CBP time > 90 min	71	>=60min
pre	228	female	2017-07-23	2017-10-17	57.1	>= 5kg	67.4	ALCAPA	acyanosis	no	no		no	no	no	no	no		no	yes	no	no		no		3	class 3-4	no	yes	no		no		2018-04-27	Relocation of LCA	10	other	>= 6.2 score	elective	elective	open heart	180	<240 min	115	>=85 min	>=90 min	CBP time > 90 min	56	<60 min
pre	18	male	2017-06-16	2017-06-16	8	>= 5kg	70	TOF	cyanosis	no	no		no	no	no	no	no		no	no	no	no		yes	Viral pneumonia, Enterobacter cloacae septicemia, MRSA septicemia	2	class 1-2	no	yes	no		no		2018-10-16	Total repai	8	other	>= 6.2 score	elective	elective	open heart	230	<240 min	140	>=85 min	>=90 min	CBP time > 90 min	95	>=60min
post	257	female	2019-09-06	2019-09-06	2.6	< 5 kg	999	dTGA,IVS,unrestricted ASD,PDA,PHT	cyanosis	no	no		no	no	no	no	no		no	yes	yes	no		yes		3	class 3-4	yes	yes	yes	PGE1	yes	PIP/TAZ	2019-09-17	Arterial switch operation with direct closure ASD with PDA division	11	other	>= 6.2 score	elective	elective	open heart	275	>=240 min	197	>=85 min	>=90 min	CBP time > 90 min	143	>=60min
post	1	male	2019-02-25	2019-02-25	3.5	< 5 kg	50	HLHS with CoA	cyanosis	no	no		no	no	no	no	no		no	yes	no	no		yes		4	class 3-4	yes	yes	yes	PGE1	yes	meropenem	2019-05-01	modified Norwood with RMBTS	14.5	other	>= 6.2 score	elective	elective	open heart	465	>=240 min	170	>=85 min	>=90 min	CBP time > 90 min	97	>=60min
pre	83	female	2019-03-03	2019-03-07	3.3	< 5 kg	56	Truncus arteriosus type II	cyanosis	no	yes	R/O PHACE syndrome	no	no	no	yes	no		no	yes	no	no		yes		3	class 3-4	yes	yes	no		yes	Meropenem	2019-03-29	Total repair	11	other	>= 6.2 score	elective	elective	open heart	280	>=240 min	156	>=85 min	>=90 min	CBP time > 90 min	114	>=60min
post	156	female	2018-10-17	#NULL!	6	>= 5kg	67	PA/IVS s/p atrial septostomy, RMBTS	cyanosis	no	no		no	no	no	no	yes	GDD, spastic CP	no	no	no	yes	RMBTS with PDA ligation 24.10.2018, decompress RMBTS 07.11.2018	yes		4	class 3-4	yes	yes	no		yes	meroepnem,vancomycin	2019-10-18	Bidirectional Glenn operation	7	other	>= 6.2 score	elective	elective	open heart	315	>=240 min	141	>=85 min	>=90 min	CBP time > 90 min	#NULL!	#NULL!
pre	12	male	2018-09-06	2018-09-06	3.1	< 5 kg	999	HLHS	cyanosis	no	no		no	no	no	no	no		no	no	no	no		yes		4	class 3-4	no	yes	yes	PGE1	no		2018-09-18	Norwood	14.5	other	>= 6.2 score	elective	elective	open heart	335	>=240 min	221	>=85 min	>=90 min	CBP time > 90 min	86	>=60min
post	83	male	2020-01-27	2020-01-27	3.3	< 5 kg	51	dTGA,IVS,ASD,PDA	cyanosis	no	no		no	no	no	no	no		no	no	no	no		no		4	class 3-4	no	yes	yes	PGE1	yes	PIP/TAZ	2020-02-03	Arterial switch with direct closure of ASD	10	other	>= 6.2 score	elective	elective	open heart	325	>=240 min	107	>=85 min	>=90 min	CBP time > 90 min	172	>=60min
post	167	male	2018-12-18	2018-12-18	5.6	>= 5kg	67	Large perimembranous to muscular VSD, small LVOT and AoV annulus s/p balloon AS, PA banding	acyanosis	no	no		no	no	no	no	yes	epilepsy	no	yes	no	yes	balloon AS 22.01.2019, PA banding 01.02.2019	yes	pneumonia, UTI	3	class 3-4	no	yes	no		no		2019-09-06	Yasui operation conristing of DKS	9.5	other	>= 6.2 score	elective	elective	open heart	320	>=240 min	218	>=85 min	>=90 min	CBP time > 90 min	34	<60 min
pre	42	female	2018-09-26	2018-09-26	3.5	< 5 kg	999	Ebstein's anomaly severe TR with PA/IVS	cyanosis	no	no		no	no	no	no	no		no	yes	no	yes	PDA stent 04.10.2018	yes		4	class 3-4	yes	yes	yes	Propanolol	yes	Meropenem	2018-11-23	RMBTS	6.3	6.3 score	>= 6.2 score	elective	elective	open heart	380	>=240 min	257	>=85 min	>=90 min	CBP time > 90 min	103	>=60min
pre	159	female	2018-11-22	#NULL!	2.86	< 5 kg	50	HLHS (MS, AA)	cyanosis	yes	no		no	no	no	no	no		no	yes	yes	no		no		4	class 3-4	yes	yes	yes	cefazolin, PGE1, lasix	yes	Cefazolin q 6	2018-11-28	Norwood, RMBTS	14.5	other	>= 6.2 score	urgency	emergency or urgency	open heart	360	>=240 min	111	>=85 min	>=90 min	CBP time > 90 min	88	>=60min
post	45	male	2020-01-04	#NULL!	2.8	< 5 kg	48	HLHS	cyanosis	no	no		no	no	no	no	no		no	yes	no	no		yes	NEC	4	class 3-4	yes	yes	yes	PGE1	yes	meropenem	2020-01-27	modified norwood operation with RMBTS	14.5	other	>= 6.2 score	elective	elective	open heart	480	>=240 min	297	>=85 min	>=90 min	CBP time > 90 min	96	>=60min
post	118	female	2019-05-30	2019-06-02	2.75	< 5 kg	54	HLHS with hypoplastic aortic arch with large PDA with restricted ASD	cyanosis	no	no		no	no	no	no	no		no	no	no	no		yes	late neonatal sepsis	4	class 3-4	yes	yes	no		yes	meropenem	2019-06-18	modified norwood operation with RMBTS	14.5	other	>= 6.2 score	elective	elective	open heart	325	>=240 min	237	>=85 min	>=90 min	CBP time > 90 min	81	>=60min
post	78	male	2020-02-08	#NULL!	3.8	< 5 kg	50	dTGA,VSD,PFO,PDA with PHT	cyanosis	no	no		no	no	no	no	no		no	yes	no	no		yes		4	class 3-4	no	yes	yes	PGE1	yes	PIP/TAZ	2020-02-21	ASD with VSD , PFO closure with relocation of left coronary button	11	other	>= 6.2 score	elective	elective	open heart	395	>=240 min	171	>=85 min	>=90 min	CBP time > 90 min	312	>=60min
post	145	male	2012-08-14	#NULL!	16.7	>= 5kg	120	ccTGA with VSD with PA	cyanosis	no	no		no	no	no	no	no		no	no	no	yes	RMBTS 07.09.2012	no		2	class 1-2	no	yes	no		no		2019-07-26	Hemi-Mustard's operation with BDG with Rastelli's operation	11	other	>= 6.2 score	elective	elective	open heart	285	>=240 min	200	>=85 min	>=90 min	CBP time > 90 min	107	>=60min
pre	222	female	2018-03-30	#NULL!	2.8	< 5 kg	52	Interrupted aortic arch type A,perimembranous VSD,PFO	acyanosis	no	no		no	no	no	no	no		no	no	no	no		yes	Pneumonia	3	class 3-4	yes	yes	yes	PGE1	no		2018-04-08	Total repair by aortic arch-descending aorta anastomosis and DHCA/SACP, VSD Closure with Gluteraldehyde treated pericardial patch, direct PFO closure	10.8	other	>= 6.2 score	elective	elective	open heart	260	>=240 min	119	>=85 min	>=90 min	CBP time > 90 min	104	>=60min
post	154	female	2019-07-27	#NULL!	2.4	< 5 kg	46	dTGA with unrestrictive ASD	cyanosis	no	no		no	no	no	no	no		no	yes	no	no		yes	pneumonia	2	class 1-2	no	yes	no		no		2019-08-13	Arterial switch with ASD primary closure	10	other	>= 6.2 score	elective	elective	open heart	450	>=240 min	287	>=85 min	>=90 min	CBP time > 90 min	174	>=60min
pre	69	female	2019-02-25	#NULL!	3.5	< 5 kg	50	dTGA with IVS	cyanosis	no	no		no	no	no	no	no		no	yes	no	no		yes		3	class 3-4	yes	yes	yes	PGE1	yes	Meropenem	2019-03-05	Arterial switch operation	10	other	>= 6.2 score	elective	elective	open heart	530	>=240 min	174	>=85 min	>=90 min	CBP time > 90 min	95	>=60min
post	184	female	2019-10-01	2019-10-01	2.5	< 5 kg	48	TAPVR supracardiac type	cyanosis	no	no		no	no	no	no	no		no	yes	no	no		no		3	class 3-4	no	yes	no		no		2019-10-11	TAPVR repair	9	other	>= 6.2 score	elective	elective	open heart	270	>=240 min	132	>=85 min	>=90 min	CBP time > 90 min	73	>=60min
pre	3	female	2017-10-12	2017-11-04	7.4	>= 5kg	68	PA/IVS,unipartite with shunt stenosis	cyanosis	no	no		no	no	no	no	no		no	no	no	yes	RMBTS 09.11.2017, balloon septostomy 06.11.2017	no		4	class 3-4	yes	yes	no		yes	Meropenem	2018-09-07	Right BDG	7	other	>= 6.2 score	elective	elective	open heart	240	>=240 min	100	>=85 min	>=90 min	CBP time > 90 min	#NULL!	#NULL!
pre	15	male	2018-09-26	#NULL!	2.8	< 5 kg	999	PA/IVS,unipartite RV	cyanosis	no	no		no	no	no	no	no		no	yes	no	no		yes	Early neonatal sepsis	2	class 1-2	no	yes	yes	PGE1	yes	Ampicillin,Gentamicin	2018-10-03	RMBTS	6.3	6.3 score	>= 6.2 score	elective	elective	open heart	118	<240 min	#NULL!	#NULL!	no	closed and < 90 min	#NULL!	#NULL!
pre	34	female	2018-10-17	#NULL!	2.9	< 5 kg	47	PA/IVS	cyanosis	no	no		no	no	no	no	no		no	no	no	no		no		4	class 3-4	no	yes	yes	PGE1	no		2018-10-24	RMBTS with PDA ligation	6.3	6.3 score	>= 6.2 score	elective	elective	open heart	120	<240 min	#NULL!	#NULL!	no	closed and < 90 min	#NULL!	#NULL!
pre	132	female	2018-07-30	2018-07-31	2.07	< 5 kg	47	PA/VSD, PDA, tracheal stenosis	cyanosis	no	no		no	no	no	no	yes	SGA, tracheal stenosis refer and admit NICU since DOL 1, failure extubation, transfer Anan 7 DOL 25, weight 3 kg	no	no	no	no		no		3	class 3-4	yes	yes	yes	PGE1	no		2018-09-24	RMBTS 3.5 mm	6.3	6.3 score	>= 6.2 score	urgency	emergency or urgency	closed heart	135	<240 min	#NULL!	#NULL!	no	closed and < 90 min	#NULL!	#NULL!
pre	270	male	2018-04-09	#NULL!	2.5	< 5 kg	49	Heterotaxy syndrome unbalanced AVSD with ASD primum, RV dominant, PA supplied by PDA	acyanosis	yes	no		no	no	no	no	no		yes	yes	no	no		yes		3	class 3-4	no	yes	no		no		2018-05-10	Central shunt-arch-LPA	6.8	other	>= 6.2 score	elective	elective	closed heart	95	<240 min	#NULL!	#NULL!	no	closed and < 90 min	#NULL!	#NULL!
post	178	female	2019-09-18	2019-09-18	3.6	< 5 kg	50	PA.IVS with unipartite RV	cyanosis	no	no		no	no	no	no	no		no	no	no	no		no		3	class 3-4	no	yes	yes	PGE1	no		2019-09-27	Innominate artery to proximal RPA shunt	6.3	6.3 score	>= 6.2 score	elective	elective	closed heart	100	<240 min	#NULL!	#NULL!	no	closed and < 90 min	#NULL!	#NULL!
post	105	female	2019-04-19	#NULL!	2.4	< 5 kg	50	DORV subpulmonic VSD, PA confluent with large PDA	cyanosis	no	no		no	no	no	no	yes	TE fistula	no	no	no	no		no		4	class 3-4	no	yes	no		no		2019-05-14	LMBTS	6.3	6.3 score	>= 6.2 score	elective	elective	closed heart	130	<240 min	#NULL!	#NULL!	no	closed and < 90 min	#NULL!	#NULL!
post	51	male	2019-12-14	2019-12-16	2.7	< 5 kg	48	Dextrocardia,ccTGA,VSD,PA	cyanosis	no	no		no	no	no	no	yes	subglottic stenosis	no	yes	no	no		yes	NEC IB	4	class 3-4	no	yes	yes	PGE1	no		2020-03-02	RMBTS	6.3	6.3 score	>= 6.2 score	elective	elective	closed heart	75	<240 min	#NULL!	#NULL!	no	closed and < 90 min	#NULL!	#NULL!
pre	219	male	2018-03-21	2018-03-21	2.83	< 5 kg	51	DORV subaortic VSD,PA with non-confluent PA with MAPCAs	cyanosis	no	no		no	no	no	no	yes	G6PD deficiency	no	yes	no	no		no		3	class 3-4	no	yes	yes	PGE1	no		2018-04-02	LMBTS with Goretext graft 3 mm.	6.3	6.3 score	>= 6.2 score	elective	elective	closed heart	120	<240 min	#NULL!	#NULL!	no	closed and < 90 min	#NULL!	#NULL!
post	66	female	2019-04-18	#NULL!	3.4	< 5 kg	50	PA/IVS, hypoplastic unipartite RV, confluent PA	cyanosis	no	no		no	no	no	no	no		no	no	no	no		no		4	class 3-4	no	yes	yes	PGE1	no		2019-04-22	RMBTS	6.8	other	>= 6.2 score	elective	elective	closed heart	105	<240 min	#NULL!	#NULL!	no	closed and < 90 min	#NULL!	#NULL!
post	53	female	2020-03-04	2020-03-04	2.8	< 5 kg	51	PA/IVS tripartite RV	cyanosis	no	no		no	no	no	no	no		no	yes	no	no		no		3	class 3-4	no	yes	yes	PGE1	yes	PIP/TAZ	2020-03-23	RMBTS	6.3	6.3 score	>= 6.2 score	elective	elective	closed heart	90	<240 min	#NULL!	#NULL!	no	closed and < 90 min	#NULL!	#NULL!
[truncated: 141 more columns]
